# Supplementary material for: Visible-light-driven electrophilic chalcogen species: integration of sustainable synthesis, green metrics, and computational discovery of antioxidants
Source: Royal Society of Chemistry journal article supplement (doi:10.1039/d5qo01286d), 2026-01-01
Supplement: d5qo01286d1.pdf [file d5qo01286d1.pdf]

## *Supporting Information*

### **Visible-Light-Driven Electrophilic Chalcogen Species: Integration of Sustainable Synthesis, Green Metrics, and Computational Discovery of Antioxidants**

Filipe. T. Coelho<sup>a</sup>, Leonardo V. E. Guimarães<sup>a</sup>, Camila P. Ebersol<sup>a</sup>, Larissa G. Velasco<sup>a</sup>, Pâmella da Costa<sup>b</sup>, Cristiani F. Bortolatto<sup>b</sup>, Wendell T. Coltro<sup>a</sup>, Luciano M. Lião<sup>a</sup>, Felipe L. Coelho<sup>c\*</sup> and José S. S. Neto<sup>a\*</sup>

<sup>a</sup> SustenSin - Instituto de Química, Universidade Federal de Goiás, 74690-900 Goiânia – GO, Brasil.

<sup>b</sup> LABIONEM - Centro de Ciências Químicas, Farmacêuticas e de Alimentos, Universidade Federal de 96010-900, Pelotas – RS, Brasil.

<sup>c</sup> Instituto de Química, Universidade Federal do Rio grande do Sul, 91501 – 970, Porto Alegre – RS, Brasil.

#### **TABLE OF CONTENTS**

|                                                     |    |
|-----------------------------------------------------|----|
| 1. General Information .....                        | 2  |
| 2. Photoreactor.....                                | 3  |
| 3. Controlled Experiments.....                      | 4  |
| 4. Synthetic Procedures.....                        | 5  |
| 5. Spectral data of the products <b>3a-ae</b> ..... | 6  |
| 6. Green Chemistry Metrics.....                     | 12 |
| 7. NMR Characterization .....                       | 15 |
| 8. Supplementary Results of Molecular Docking ..... | 43 |

## 1. General Information

The reactions were monitored by TLC carried out on Merck silica gel (60 F254) by using UV light as visualizing agent and 5% vanillin in 10% H<sub>2</sub>SO<sub>4</sub> and heat as developing agents. Nuclear magnetic resonance spectra (<sup>1</sup>H NMR) were acquired on a Bruker Avance III 500 spectrometer (Bruker, Rheinstetten, Germany) operating at 11.75 Tesla, fitted with a broadband inverse (BBI) probe at 25 °C. <sup>1</sup>H NMR spectra were acquired by zg30 pulse program (Bruker) in 64k points with an acquisition time of 3.27 s, a relaxation delay of 1 s and 16 scans. <sup>13</sup>C NMR spectra were acquired by zgpg30 pulse program (Bruker) in 64k points with an acquisition time of 0.91 s, a relaxation delay of 0.5 s and 2048 scans. Chemical shifts are reported in ppm, referenced to tetramethylsilane (TMS) as the external reference. Coupling constants (J) are reported in Hertz. Abbreviations to denote the multiplicity of a particular signal are s (singlet), d (doublet), dt (doublet of triplet), t (triplet), q (quartet), quint (quintet), sext (sextet), m (multiplet) and brd (broad doublet). Chemical shifts (δ) are given in parts per million from the peak of tetramethylsilane (δ = 0.00 ppm) as the internal standard in <sup>1</sup>H NMR or from the solvent peak of CDCl<sub>3</sub> (d = 77.00 ppm) in <sup>13</sup>C NMR. Triethylamine and carbon tetrabromide were purchased from commercial suppliers and used as received.

## 2. Photoreactor

The home-made photoreactor used in the experiments, illustrated above, consists of five irradiation units mounted inside an MDF box. The box has a width of 24 cm, with the sample positioned approximately 12 cm from the irradiation source. A cooling fan was installed at the top of the box to regulate the internal temperature, which is monitored with a digital thermometer. Each irradiation unit is equipped with either a 50 W blue or a 50 W white chip LED coupled to a processor cooler. For this study, a single 50 W blue LED unit was employed. The reaction mixture was stirred with a magnetic stirrer positioned inside the photoreactor.

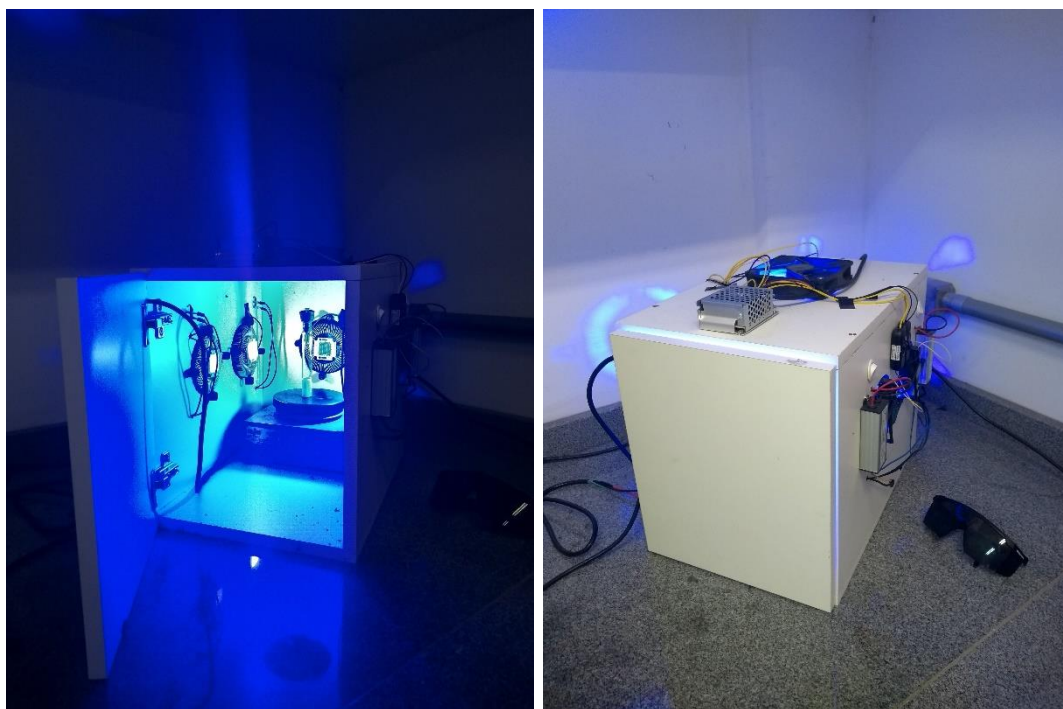

### 3. Controlled Experiments

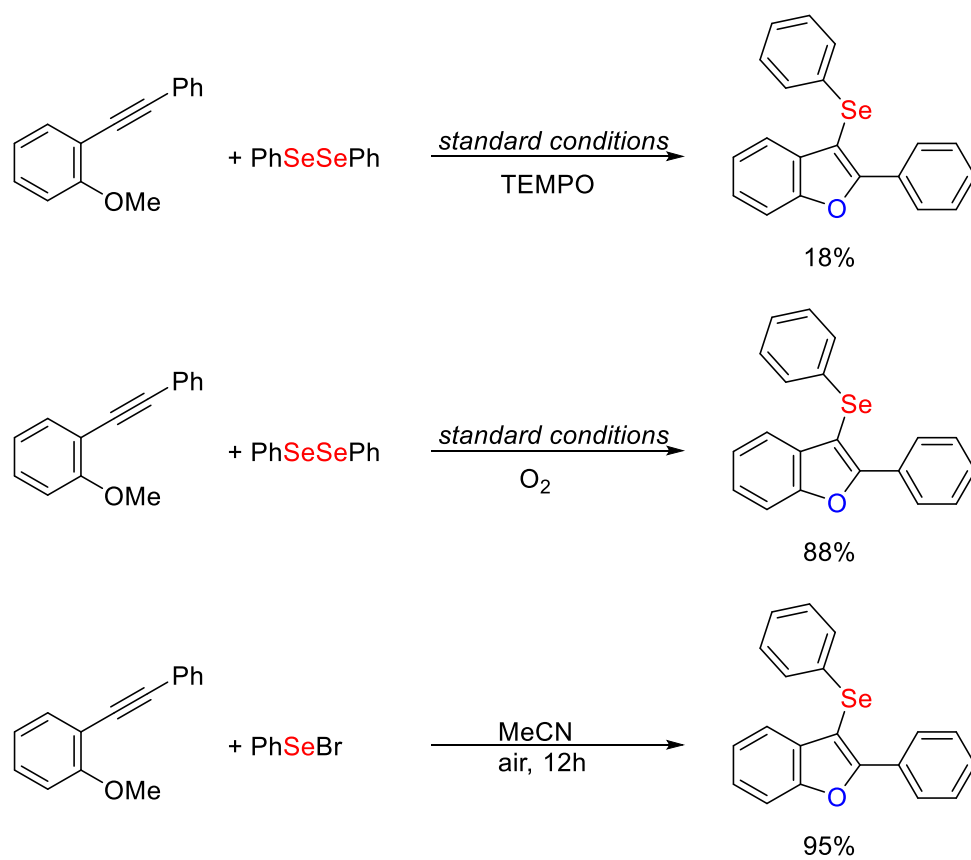

**Scheme 1.** Controlled experiments performed to investigate the reaction mechanism.

## 4. Synthetic procedures

### 4.1 General procedure for 1-methoxy-2-(arylethynyl)benzene derivatives<sup>1</sup>

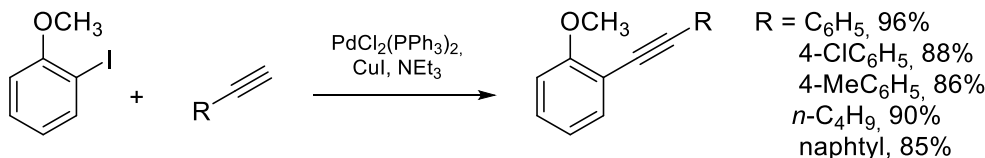

In Schlenk tube, a mixture of 2-iodoanisole (650  $\mu$ L, 5.0 mmol), arylacetylene derivative (5.0 mmol), PdCl<sub>2</sub>(PPh<sub>3</sub>)<sub>2</sub> (3 mol%, 109 mg, 0.15 mmol) and CuI (3 mol%, 28 mg, 0.15 mmol) in triethylamine (20 mL) was stirred under argon at room temperature overnight. The reaction mixture was filtered through a layer of Celite and concentrated in vacuo. The residue was dissolved in ethyl acetate (50 mL) and washed with water (2 x 20 mL). The organic layer was dried over MgSO<sub>4</sub>, the solvent was evaporated under reduced pressure and the crude product was purified on a silica gel column using hexane as eluent.

### 4.2. General procedure for the synthesis of diorganyl dichalcogenides 2.

#### 4.2.1. General Procedure for the Synthesis of Organic Diselenides (RSeSeR)<sup>2</sup>

Under an inert atmosphere of nitrogen, a dry round-bottom flask equipped with a magnetic stirrer was charged with magnesium turnings (1.0 equiv) and anhydrous diethyl ether. The corresponding organic halide (R-X, 2.0 equiv) was added dropwise, and the mixture was stirred until complete formation of the organomagnesium reagent was achieved. Powdered elemental selenium (1.0 equiv) was then added portionwise at 0 °C, and the reaction mixture was allowed to warm to room temperature and stirred for an additional 1–2 h.

After completion, the reaction was quenched by careful addition of saturated aqueous ammonium chloride solution, and the resulting mixture was stirred under air for 4–6 h to promote oxidative coupling of the intermediate organoselenium species. The biphasic mixture was then extracted with ethyl acetate, and the combined organic layers were washed with water and brine, dried over anhydrous magnesium sulfate, filtered, and

<sup>1</sup> Jablonkai, I.; Bogner, M. M.; Zsignár-Nagy, B.; Simon, J.; London, G. *Eur. J. Org. Chem.* **2025**, 28, e202401114.

<sup>2</sup> H. J. Reich, M. L. Cohen and P. S. Clark, *Reagents for Synthesis of Organoselenium Compounds: Diphenyl Diselenide and Benzeneselenenyl Chloride*, *Org. Synth.*, **1979**, 59, 141.

concentrated under reduced pressure. The crude product was purified by recrystallization from hexane to afford the corresponding organic diselenide (RSeSeR).

#### 4.2.2. General Procedure for the Synthesis of Organic Disulfides (RSSR)<sup>3</sup>

A round-bottom flask equipped with a magnetic stirrer was charged with the corresponding thiol (R–SH, 2.0 equiv) and an appropriate solvent. Aqueous hydrogen peroxide (30%, 1.0 equiv) was added dropwise at room temperature, and the reaction mixture was stirred under air for 3 h. After completion, the reaction mixture was diluted with water and extracted with ethyl acetate. The combined organic layers were washed with water and brine, dried over anhydrous magnesium sulfate, filtered, and concentrated under reduced pressure. The crude product was purified by recrystallization from hexane to afford the corresponding organic disulfide (RSSR).

#### 4.3. General procedure for the synthesis of compounds 3a-ae:

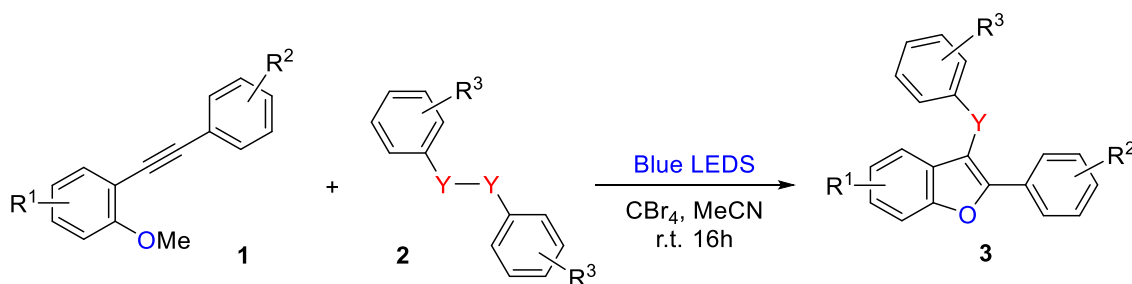

In a 5.0 mL glass tube, the corresponding 2-alkynylanisole (0.25 mmol) and diorganyl chalcogenide (0.137 mmol) was added to a solution of CBr<sub>4</sub> (83 mg; 0.25 mmol) in acetonitrile under air. The reaction mixture was irradiated with blue light for 16h in the photoreactor. After completion of the reaction, the crude residue was concentrated under reduced pressure and adsorbed onto silica gel (~1.0 g). The mixture was dried under vacuum to afford a free-flowing powder, which was applied as a dry layer to the top of the prepacked silica gel column. Elution with hexane afforded the purified product.

<sup>3</sup> M. Kirihara, Y. Asai, S. Ogawa, T. Noguchi, A. Hatano and Y. Hirai, *Synthesis*, **2007**, 3286–3289.

## 1. Spectral data of the products 3a-ad:

### Compound 3a: 2-phenyl-3-(phenylselanyl)benzo[*b*]furan.<sup>4</sup>

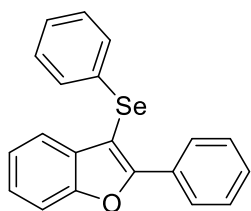

White solid. **Yield:** 86 mg, 98%. **<sup>1</sup>H NMR** (500 MHz, CDCl<sub>3</sub>) δ 8.20 (d, *J* = 7.2 Hz, 2H), 7.55 (d, *J* = 8.2 Hz, 1H), 7.51 (d, *J* = 7.8 Hz, 1H), 7.45 (d, *J* = 7.2 Hz, 2H), 7.38 (t, *J* = 7.3 Hz, 1H), 7.35 – 7.28 (m, 3H), 7.24 – 7.21 (m, 1H), 7.18 – 7.10 (m, 3H). **<sup>13</sup>C NMR** (125 MHz, CDCl<sub>3</sub>) δ 157.4, 154.3, 132.1, 131.5, 130.3, 129.5, 129.3, 128.6, 127.9, 126.4, 125.4, 123.6, 121.4, 111.3, 99.8.

### Compound 3b: 2-phenyl-3-(*p*-tolylselanyl)benzo[*b*]furan.<sup>13</sup>

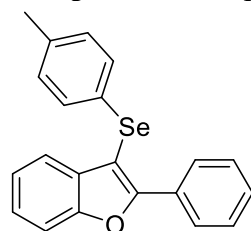

Yellow solid. **Yield:** 81 mg, 89%. **<sup>1</sup>H NMR** (500 MHz, CDCl<sub>3</sub>) δ 8.21 (d, *J* = 7.4 Hz, 2H), 7.52 (t, *J* = 8.2 Hz, 2H), 7.43 (t, *J* = 7.6 Hz, 2H), 7.36 (t, *J* = 7.3 Hz, 1H), 7.30 (t, *J* = 7.3 Hz, 1H), 7.22 – 7.19 (m, 3H), 6.96 (d, *J* = 8.1 Hz, 2H), 2.22 (s, 3H). **<sup>13</sup>C NMR** (125 MHz, CDCl<sub>3</sub>) δ 157.1, 154.2, 136.3, 132.1, 130.2, 129.7, 129.3, 128.6, 127.9, 127.6, 125.3, 123.5, 121.4, 111.2, 100.3, 21.1.

### Compound 3c: 2-phenyl-3-(*o*-tolylselanyl)benzo[*b*]furan.<sup>13</sup>

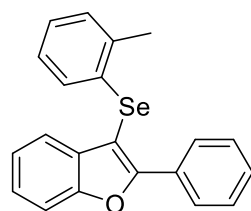

Pallid oil. **Yield:** 82 mg, 91%. **<sup>1</sup>H NMR** (500 MHz, CDCl<sub>3</sub>) δ 8.18 – 8.16 (m, 2H), 7.56 (d, *J* = 8.2 Hz, 1H), 7.47 – 7.41 (m, 3H), 7.37 (t, *J* = 7.3 Hz, 1H), 7.33 – 7.31 (m, 1H), 7.23 – 7.21 (m, 1H), 7.15 (d, *J* = 7.4 Hz, 1H), 7.04 (t, *J* = 7.4 Hz, 1H), 6.96 (d, *J* = 7.8 Hz, 1H), 6.87 (t, *J* = 7.6 Hz, 1H), 2.47 (s, 3H). **<sup>13</sup>C NMR** (125 MHz, CDCl<sub>3</sub>) δ 157.7, 154.4, 136.9, 132.2, 132.1, 130.3, 130.2, 129.4, 128.6, 128.5, 127.9, 126.9, 126.2, 125.4, 123.6, 121.4, 111.3, 99.3, 21.6.

### Compound 3d: 3-((*p*-methoxyphenyl)selanyl)-2-phenylbenzo[*b*]furan.<sup>13</sup>

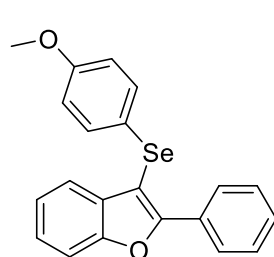

Pallid yellow solid. **Yield:** 91 mg, 96%. **<sup>1</sup>H NMR** (500 MHz, CDCl<sub>3</sub>) δ 8.27 (d, *J* = 7.5 Hz, 2H), 7.57 – 7.55 (m, 2H), 7.52 – 7.49 (m, 2H), 7.45 – 7.42 (m, 1H), 7.37 – 7.32 (m, 3H), 7.29 – 7.24 (m, 1H), 6.76 (d, *J* = 8.4 Hz, 2H), 3.76 (s, 2H). **<sup>13</sup>C NMR** (125 MHz, CDCl<sub>3</sub>) δ 158.9, 156.6, 154.2, 132.1, 132.0, 130.4, 129.3, 128.6, 127.9, 125.2, 123.5, 121.4, 121.2, 115.2, 111.3, 101.1, 55.4.

### Compound 3e: 3-((2-methoxyphenyl)selanyl)-2-phenylbenzofuran.<sup>13</sup>

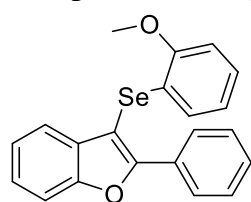

Yellow oil. **Yield:** 85 mg, 90%. **<sup>1</sup>H NMR** (500 MHz, CDCl<sub>3</sub>) δ 8.19 (d, *J* = 7.3 Hz, 2H), 7.57 (d, *J* = 8.2 Hz, 1H), 7.53 (d, *J* = 7.7 Hz, 1H), 7.44 – 7.41 (m, 2H), 7.38 – 7.33 (m, 2H), 7.25 – 7.22 (m, 1H), 7.13 – 7.10 (m, 1H), 6.85 (d, *J* = 8.1 Hz, 1H), 6.78 (dd, *J* = 7.7, 1.2 Hz, 1H), 6.66 (t, *J* = 7.3 Hz, 1H), 3.95 (s, 3H). **<sup>13</sup>C NMR** (125 MHz,

<sup>4</sup> G. B. Blödorn, L. F. B. Duarte, J. A. Roehrs, M. S. Silva, J. S. S. Neto and D. Alves, *Eur. J. Org. Chem.*, **2022**, 2022, e202200775.

CDCl<sub>3</sub>)  $\delta$  158.2, 156.0, 154.4, 132.3, 130.3, 129.4, 128.6, 128.3, 127.9, 126.9, 125.4, 123.6, 121.9, 121.5, 111.3, 110.4, 98.0, 56.0.

**Compound 3f:** 3-((4-(tert-butyl)phenyl)selanyl)-2-phenylbenzo[*b*]furan.<sup>5</sup>

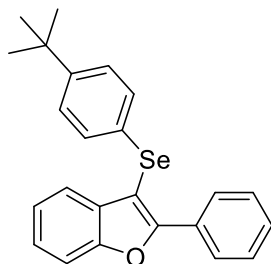

White solid. **Yield:** 23 mg, 23%. <sup>1</sup>H NMR (500 MHz, CDCl<sub>3</sub>)  $\delta$  8.23 (d, *J* = 7.8 Hz, 2H), 7.56 – 7.53 (m, 2H), 7.45 (t, *J* = 7.6 Hz, 2H), 7.40 – 7.37 (m, 1H), 7.35 – 7.31 (m, 1H), 7.25 – 7.22 (m, 3H), 7.18 (d, *J* = 8.4 Hz, 2H), 1.23 (s, 9H). <sup>13</sup>C NMR (125 MHz, CDCl<sub>3</sub>)  $\delta$  157.3, 154.3, 149.6, 132.3, 131.5, 130.4, 129.4, 129.3, 128.6, 127.9, 127.8, 126.6, 125.3, 123.5, 121.5, 111.3, 100.1, 34.5, 31.4.

**Compound 3g:** 3-((4-chlorophenyl)selanyl)-2-phenylbenzofuran.<sup>13</sup>

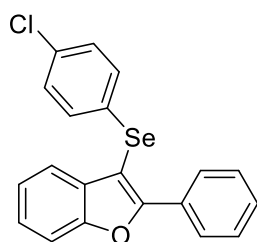

Yellow solid. **Yield:** 78 mg, 82%. <sup>1</sup>H NMR (500 MHz, CDCl<sub>3</sub>)  $\delta$  8.17 (d, *J* = 7.4 Hz, 2H), 7.55 (d, *J* = 8.2 Hz, 1H), 7.49 – 7.43 (m, 3H), 7.39 (t, *J* = 7.3 Hz, 1H), 7.35 – 7.32 (m, 1H), 7.25 – 7.19 (m, 3H), 7.12 (d, *J* = 8.5 Hz, 2H). <sup>13</sup>C NMR (125 MHz, CDCl<sub>3</sub>)  $\delta$  157.5, 154.3, 132.5, 131.7, 130.6, 130.1, 129.7, 129.6, 129.5, 128.7, 127.9, 125.5, 123.7, 121.2, 111.4, 99.5.

**Compound 3h:** 3-((4-fluorophenyl)selanyl)-2-phenylbenzo[*b*]furan.<sup>13</sup>

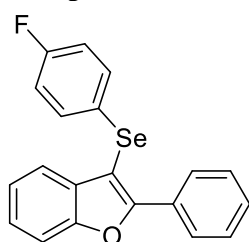

White solid. **Yield:** 67 mg, 73%. <sup>1</sup>H NMR (500 MHz, CDCl<sub>3</sub>)  $\delta$  8.20 – 8.18 (m, 2H), 7.53 (brd, *J* = 8.2 Hz, 1H), 7.48 (brd, *J* = 8.3 Hz, 1H), 7.45 – 7.42 (m, 2H), 7.39 – 7.36 (m, 1H), 7.32 – 7.29 (m, 1H), 7.27 – 7.25 (m, 2H), 7.23 – 7.20 (m, 1H), 6.86 – 6.83 (m, 2H). <sup>13</sup>C NMR (125 MHz, CDCl<sub>3</sub>)  $\delta$  162.0 (d, *J* = 246.2 Hz), 157.2, 154.3, 131.8, 131.5 (d, *J* = 7.6 Hz), 130.2, 129.5, 128.6, 127.9, 125.7 (d, *J* = 3.2 Hz), 125.4, 123.6, 121.2, 116.6 (d, *J* = 21.8 Hz), 111.4, 100.3.

**Compound 3i:** 2-phenyl-3-((3-(trifluoromethyl)phenyl)selanyl)benzo[*b*]furan.<sup>13</sup>

White solid. **Yield:** 84 mg, 81%. <sup>1</sup>H NMR (500 MHz, CDCl<sub>3</sub>)  $\delta$  8.18 – 8.16 (m, 2H), 7.60 (s, 1H), 7.57 (brd, *J* = 8.2 Hz, 1H), 7.49 – 7.43 (m, 3H), 7.41 – 7.33 (m, 4H), 7.26 – 7.20 (m, 2H). <sup>13</sup>C NMR (125 MHz, CDCl<sub>3</sub>)  $\delta$  157.9, 154.3, 132.9, 132.2, 131.6, 131.7 (q, *J*<sub>2</sub> = 32.7 Hz), 131.5, 130.0, 129.7 (d, *J*<sub>3</sub> = 9.8 Hz), 128.7, 127.9, 125.7 (q, *J*<sub>4</sub> = 4.4 Hz), 125.6, 123.8, 123.6 (q, *J*<sub>1</sub> = 272.9 Hz), 123.2 (q, *J*<sub>4</sub> = 3.3 Hz), 121.0, 111.5, 98.9.

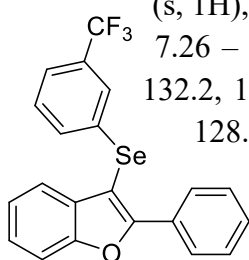

**Compound 3j:** 3-(mesityl)selanyl)-2-phenylbenzofuran.<sup>13</sup> White solid. **Yield:** 65 mg,

66%. <sup>1</sup>H NMR (500 MHz, CDCl<sub>3</sub>)  $\delta$  8.18 – 8.04 (m, 2H), 7.46 (dt, *J* = 14.1, 7.9 Hz, 3H), 7.41 – 7.35 (m, 1H), 7.25 – 7.16 (m, 1H), 7.05 – 6.98 (m, 1H), 6.97 – 6.92 (m, 1H), 6.85 (s, 2H), 2.39 (s, 6H), 2.22 (s, 3H). <sup>13</sup>C NMR (125 MHz, CDCl<sub>3</sub>)  $\delta$

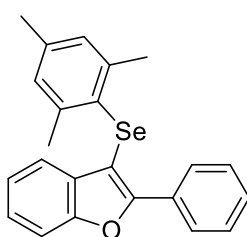

<sup>5</sup> M. H. Shaw, J. Twilton and D. W. C. MacMillan, *J. Org. Chem.*, 2016, **81**, 6898.



154.0, 153.5, 142.2, 138.2, 131.6, 130.7, 128.9, 128.6, 128.4, 127.47, 127.4, 126.4, 124.6, 122.8, 120.7, 111.0, 102.3, 24.1, 20.9.

**Compound 3k:** 3-(naphthalen-1-ylselanyl)-2-phenylbenzo[*b*]furan.<sup>6</sup>

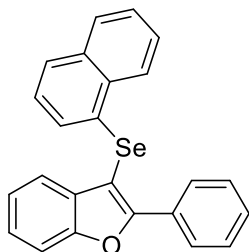

White solid. **Yield:** 83 mg, 83%. <sup>1</sup>H NMR (500 MHz, CDCl<sub>3</sub>) δ 8.22 – 8.19 (m, 3H), 7.80 (d, *J* = 8.0 Hz, 1H), 7.61 (d, *J* = 8.1 Hz, 1H), 7.55 – 7.44 (m, 4H), 7.41 – 7.38 (m, 2H), 7.36 – 7.33 (m, 1H), 7.31 – 7.28 (m, 1H), 7.25 – 7.23 (m, 1H), 7.18 – 7.10 (m, 2H). <sup>13</sup>C NMR (125 MHz, CDCl<sub>3</sub>) δ 157.8, 154.4, 134.2, 132.6, 132.3, 132.0, 130.2, 129.5, 128.8, 128.6, 127.9, 127.2, 126.9, 126.6, 126.4, 126.3, 125.7, 125.4, 123.6, 121.4, 111.4, 99.2.

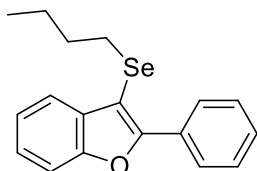

**Compound 3l:** 3-(butylselanyl)-2-phenylbenzofuran.<sup>13</sup> Yellow Oil. **Yield:** 61mg, 74%. <sup>1</sup>H NMR (500 MHz, CDCl<sub>3</sub>) δ 8.30 (d, *J* = 7.0 Hz, 2H), 7.69 – 7.66 (m, 1H), 7.51 – 7.47 (m, 1H), 7.44 (dd, *J* = 8.5, 7.0 Hz, 1H), 7.37 – 7.32 (m, 1H), 7.31 – 7.25 (m, 2H), 2.76 (t, *J* = 7.4 Hz, 2H), 1.53 (quint, *J* = 7.4 Hz, 2H), 1.31 (sext, *J* = 7.4 Hz, 2H), 0.76 (t, *J* = 7.4 Hz, 3H). <sup>13</sup>C NMR (125 MHz, CDCl<sub>3</sub>) δ 155.9, 153.90, 132.7, 130.7, 128.9, 128.39, 127.7, 124.9, 123.1, 121.0, 111.3, 100.4, 32.4, 28.3, 22.7, 13.5.

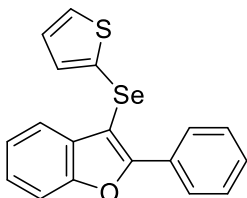

**Compound 3m:** 2-phenyl-3-(thiophen-2-ylselanyl)benzofuran.<sup>13</sup> Pallid yellow solid. **Yield** = 56 mg, 63%. <sup>1</sup>H NMR (500 MHz, CDCl<sub>3</sub>) δ 8.25 (d, *J* = 7.4 Hz, 2H), 7.68 (d, *J* = 7.6 Hz, 1H), 7.51 (t, *J* = 7.5 Hz, 3H), 7.44 (t, *J* = 7.4 Hz, 1H), 7.33 – 7.27 (m, 3H), 7.22 (d, *J* = 3.5 Hz, 1H), 6.89 (dd, *J* = 5.3, 3.5 Hz, 1H). <sup>13</sup>C NMR (125 MHz, CDCl<sub>3</sub>) δ 156.1, 153.8, 133.5, 131.6, 130.1, 129.8, 129.9, 128.4, 128.0, 127.7, 125.1, 124.5, 123.3, 121.0, 111.1, 102.1.

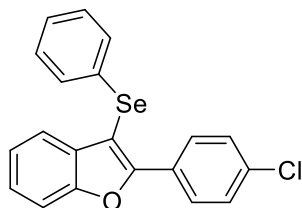

**Compound 3n:** 2-(4-chlorophenyl)-3-(phenylselanyl)benzo[*b*]furan.<sup>7</sup> Yellow solid. **Yield:** 55 mg, 57%. <sup>1</sup>H NMR (500 MHz, CDCl<sub>3</sub>) δ 8.15 (d, *J* = 8.6 Hz, 2H), 7.52 (t, *J* = 7.1 Hz, 2H), 7.39 (d, *J* = 8.6 Hz, 2H), 7.34 – 7.31 (m, 1H), 7.26 – 7.25 (m, 2H), 7.24 – 7.21 (m, 1H), 7.16 – 7.12 (m, 3H). <sup>13</sup>C NMR (125 MHz, CDCl<sub>3</sub>) δ 156.1, 154.2, 135.4, 131.9, 131.2, 129.5, 129.4, 129.1, 128.9, 128.7, 126.6, 125.6, 123.7, 121.4, 111.3, 100.4.

<sup>6</sup> Y. Murata, N. Otake, M. Sano, M. Matsumura and S. Yasuike, *Asian J. Org. Chem.*, 2021, **10**, 2975–2981.

<sup>7</sup> C. V. Doerner, M. R. Scheide, C. R. Nicoletti, D. C. Durigon, V. D. Idiarte, M. J. A. Sousa, S. R. Mendes, S. Saba, J. S. S. Neto, G. M. Martins, J. Rafique and A. L. Braga, *Front. Chem.*, 2022, **10**, 880099.

**Compound 3p:** 2-(4-chlorophenyl)-3-((4-chlorophenyl)selanyl)benzo[*b*]furan.<sup>16</sup>

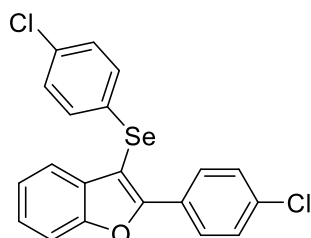

111.5, 100.1.

White solid. **Yield:** 83 mg, 79%. **<sup>1</sup>H NMR** (500 MHz, CDCl<sub>3</sub>) δ 8.17 – 8.12 (m, 2H), 7.55 (d, *J* = 8.2 Hz, 1H), 7.51 – 7.48 (m, 1H), 7.44 – 7.42 (m, 2H), 7.38 – 7.34 (m, 1H), 7.28 – 7.24 (m, 1H), 7.21 – 7.18 (m, 2H), 7.15 – 7.12 (m, 2H). **<sup>13</sup>C NMR** (125 MHz, CDCl<sub>3</sub>) δ 156.9, 154.3, 135.6, 133.5, 132.7, 131.7, 130.7, 129.7, 129.5, 129.1, 128.9, 128.6, 125.8, 123.9, 121.2,

**Compound 3q:** 3-(phenylselanyl)-2-(*p*-tolyl)benzo[*b*]furan.<sup>16</sup>

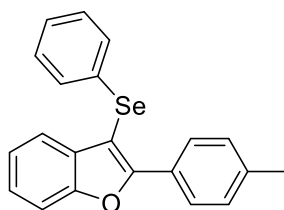

White solid. **Yield:** 80 mg, 88%. **<sup>1</sup>H NMR** (500 MHz, CDCl<sub>3</sub>) δ 8.09 (d, *J* = 8.1 Hz, 2H), 7.54 – 7.49 (m, 2H), 7.32 – 7.27 (m, 3H), 7.25 – 7.20 (m, 3H), 7.16 – 7.11 (m, 3H). **<sup>13</sup>C NMR** (125 MHz, CDCl<sub>3</sub>) δ 157.7, 154.2, 139.6, 132.2, 131.7, 129.4, 129.3, 129.2, 127.9, 127.5, 126.3, 125.1, 123.5, 121.2, 111.2, 99.1, 21.6.

**Compound 3r:** 2-(*p*-tolyl)-3-(*p*-tolylselanyl)benzo[*b*]furan.<sup>16</sup>

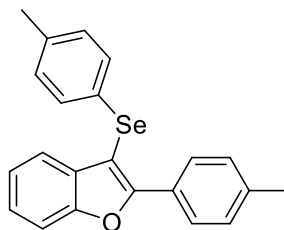

Yellow oil. **Yield:** 73 mg, 77%. **<sup>1</sup>H NMR** (500 MHz, CDCl<sub>3</sub>) δ 8.10 (d, *J* = 8.2 Hz, 2H), 7.50 (t, *J* = 8.0 Hz, 2H), 7.30 – 7.27 (m, 1H), 7.24 (d, *J* = 8.1 Hz, 2H), 7.21 – 7.18 (m, 3H), 6.95 (d, *J* = 8.0 Hz, 2H), 2.37 (s, 3H), 2.22 (s, 3H). **<sup>13</sup>C NMR** (125 MHz, CDCl<sub>3</sub>) δ 157.4, 154.2, 139.5, 136.3, 133.1, 132.2, 130.2, 129.6, 129.3, 127.8, 127.6, 125.0, 123.4, 121.2, 111.2, 99.5, 21.6, 21.1.

**Compound 3s:** 3-((4-chlorophenyl)selanyl)-2-(*p*-tolyl)benzo[*b*]furan.<sup>16</sup>

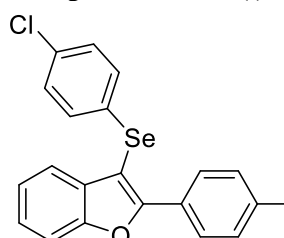

98.8, 21.6.

Yellow oil. **Yield:** 77 mg, 78%. **<sup>1</sup>H NMR** (500 MHz, CDCl<sub>3</sub>) δ 8.07 (d, *J* = 8.2 Hz, 2H), 7.54 (d, *J* = 8.2 Hz, 1H), 7.47 (d, *J* = 7.7 Hz, 1H), 7.32 (t, *J* = 7.7 Hz, 1H), 7.26 – 7.23 (m, 3H), 7.20 – 7.18 (m, 2H), 7.11 (d, *J* = 8.6 Hz, 2H), 2.39 (s, 3H). **<sup>13</sup>C NMR** (125 MHz, CDCl<sub>3</sub>) δ 157.9, 154.2, 139.8, 132.4, 131.9, 130.5, 129.9, 129.5, 129.4, 127.8, 127.3, 125.3, 123.6, 121.0, 111.3,

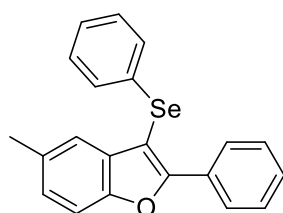

**Compound 3t:** 5-methyl-2-phenyl-3-(phenylselanyl)benzo[*b*]furan.<sup>8</sup>

White solid. **Yield:** 71 mg, 78%. White solid. **Yield:** **<sup>1</sup>H NMR** (500 MHz, CDCl<sub>3</sub>) δ (d, *J* = 7.4 Hz, 2H), 7.42 (ddd, *J* = 7.9, 5.1, 2.4 Hz, 3H), 7.39 – 7.34 (m, 1H), 7.31 (d, *J* = 1.7 Hz, 1H), 7.30 –

<sup>8</sup> Rafaela M. Gay, Flávia Manarin, Caroline C. Schneider, Daniela A. Barancelli, Michael D. Costa, Gilson Zeni *J. Org. Chem.* 2010, **75**, 5701–5706

7.26 (m, 2H), 7.18 – 7.07 (m, 4H), 2.39 (s, 2H). <sup>3</sup>C NMR (125 MHz, CDCl<sub>3</sub>) δ 157.5, 152.5, 133.0, 132.0, 131.6, 130.2, 129.3, 129.2, 128.9, 128.4, 127.7, 126.5, 126.10, 120.9, 110.7, 99.2, 21.3.

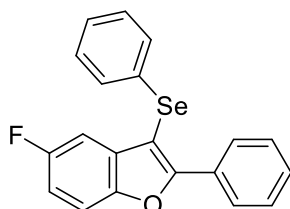

**Compound 3u:** 5-fluoro-2-phenyl-3-(phenylselanyl)benzo[*b*]furan.<sup>17</sup>

White solid. **Yield:** 59 mg, 64%. <sup>1</sup>H NMR (500 MHz, CDCl<sub>3</sub>) δ 8.19 (d, *J* = 7.6 Hz, 2H), 7.49 – 7.38 (m, 4H), 7.28 (dd, *J* = 7.3, 2.1 Hz, 2H), 7.16 (td, *J* = 6.2, 5.6, 2.3 Hz, 4H), 7.03 (td, *J* = 9.0, 2.6 Hz, 1H). <sup>3</sup>C NMR (125 MHz, CDCl<sub>3</sub>) δ 159.7 (d, *J* = 239.5 Hz), 159.0, 133.2 (d, *J* = 10.8 Hz), 131.5, 130.9, 129.8, 129.6, 129.40, 129.3, 128.5, 127.8, 126.5, 112.9 (d, *J* = 26.3 Hz), 111.9 (d, *J* = 9.4 Hz), 106.8 (d, *J* = 25.6 Hz), 99.8 (d, *J* = 3.9 Hz).

**Compound 3v:** 2-(naphthalen-1-yl)-3-(phenylselanyl)benzo[*b*]furan.<sup>9</sup>

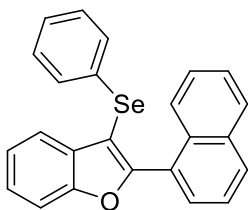

White solid. **Yield:** 79 mg, 79%. <sup>1</sup>H NMR (500 MHz, CDCl<sub>3</sub>) δ 7.97 (t, *J* = 7.4 Hz, 2H), 7.91 (d, *J* = 7.7 Hz, 1H), 7.68 (dd, *J* = 7.1, 1.0 Hz, 1H), 7.97 (t, *J* = 7.4 Hz, 1H), 7.56 – 7.46 (m, 4H), 7.40 – 7.37 (m, 1H), 7.31 – 7.35 (m, 3H), 7.13 – 7.11 (m, 3H). <sup>13</sup>C NMR (125 MHz, CDCl<sub>3</sub>) δ 159.1, 155.1, 133.8, 132.3, 131.4, 130.9, 130.6, 129.9, 129.9, 129.3, 128.6, 127.4, 126.9, 126.4, 126.3, 126.0, 125.3, 125.0, 123.6, 121.5, 111.6, 103.8.

**Compound 3w:** 2-(naphthalen-1-yl)-3-(p-tolylselanyl)benzo[*b*]furan.<sup>10</sup>

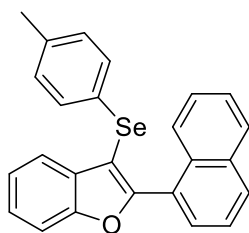

White solid. **Yield:** 87 mg, 84%. <sup>1</sup>H NMR (500 MHz, CDCl<sub>3</sub>) δ 7.94 (dd, *J* = 16.5, 8.2 Hz, 2H), 7.88 (d, *J* = 7.8 Hz, 1H), 7.68 (d, *J* = 7.0 Hz, 1H), 7.56 (dd, *J* = 14.6, 7.9 Hz, 2H), 7.51 – 7.44 (m, 3H), 7.35 (t, *J* = 7.7 Hz, 1H), 7.26 (t, *J* = 7.5 Hz, 1H), 7.16 (d, *J* = 8.0 Hz, 2H), 6.91 (d, *J* = 8.0 Hz, 2H), 2.21 (s, 3H). <sup>13</sup>C NMR (125 MHz, CDCl<sub>3</sub>) δ 158.8, 155.0, 136.4, 133.8, 132.3, 131.0, 130.5, 130.4, 130.1, 130.0, 128.5, 127.5, 127.4, 126.9, 126.3, 126.1, 125.2, 125.0, 123.6, 121.5, 111.6, 104.6, 21.1.

**Compound 3z:** 2-phenyl-3-(phenylthio)benzo[*b*]furan.<sup>13</sup>

<sup>9</sup> J. C. Kazmierczak, A. M. S. Recchi, F. Gritzenco, E. B. Balbom, T. Barcellos, A. Sperança and B. Godoi, *Eur. J. Org. Chem.*, 2017, **2017**, 6382–6389.

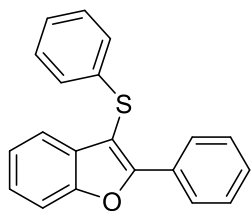

Pallid oil. **Yield:** 74 mg, 98%. **<sup>1</sup>H NMR** (500 MHz, CDCl<sub>3</sub>) δ 8.23 (d, *J* = 7.6 Hz, 2H), 7.56 (d, *J* = 8.2 Hz, 1H), 7.49 – 7.43 (m, 3H), 7.40 – 7.38 (m, 1H), 7.33 (t, *J* = 7.7 Hz, 1H), 7.22 – 7.19 (m, 5H), 7.12 – 7.09 (m, 1H). **<sup>13</sup>C NMR** (125 MHz, CDCl<sub>3</sub>) δ 157.6, 154.1, 136.3, 130.9, 129.9, 129.5, 129.2, 128.7, 127.6, 126.7, 125.7, 125.4, 123.6, 120.6, 111.5, 104.9.

**Compound 3ab:** 2-phenyl-3-(*p*-tolylthio)benzo[*b*]furan.<sup>11</sup>

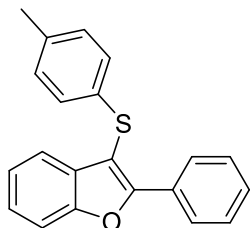

Pallid yellow solid. **Yield:** 55 mg, 70%. **<sup>1</sup>H NMR** (500 MHz, CDCl<sub>3</sub>) δ 8.26 – 8.24 (m, 2H), 7.56 (d, *J* = 8.2 Hz, 1H), 7.49 – 7.45 (m, 3H), 7.42 – 7.40 (m, 1H), 7.35 – 7.32 (m, 1H), 7.24 – 7.21 (m, 1H), 7.12 (brd, *J* = 8.2 Hz, 2H), 7.02 (d, *J* = 8.1 Hz, 2H), 2.27 (s, 3H). **<sup>13</sup>C NMR** (125 MHz, CDCl<sub>3</sub>) δ 157.3, 154.1, 135.7, 132.6, 131.1, 129.9, 129.5, 128.7, 127.5, 127.1, 125.3, 123.5, 120.6, 111.4,

21.0.

**Compound 3ac:** 2-(*p*-tolyl)-3-(*p*-tolylthio)benzo[*b*]furan.<sup>20</sup>

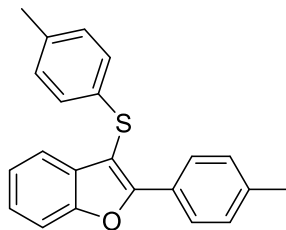

Pallid oil. **Yield:** 63 mg, 77%. **<sup>1</sup>H NMR** (500 MHz, CDCl<sub>3</sub>) δ 8.13 (d, *J* = 8.3 Hz, 2H), 7.53 (d, *J* = 8.2 Hz, 1H), 7.46 (brd, *J* = 8.3 Hz, 1H), 7.30 (ddd, *J* = 8.3, 7.3, 1.3 Hz, 1H), 7.26 – 7.23 (m, 2H), 7.20 (dd, *J* = 11.1, 3.9 Hz, 1H), 7.10 (brd, *J* = 8.2 Hz, 2H), 6.99 (brd, *J* = 8.1 Hz, 2H), 2.38 (s, 3H), 2.25 (s, 3H). **<sup>13</sup>C NMR** (125 MHz, CDCl<sub>3</sub>) δ 157.7, 153.9, 139.7, 135.5, 132.8, 131.2,

129.9, 129.4, 127.5, 127.2, 126.9, 125.1, 123.5, 120.4, 111.3, 104.6, 21.6, 21.0.

**Compound 3ad:** 2-(naphthalen-1-yl)-3-(phenylthio)benzo[*b*]furan.<sup>20</sup>

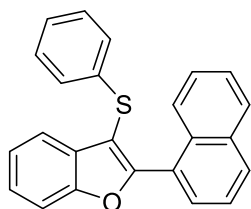

White Solid. **Yield:** 54 mg, 61%. **<sup>1</sup>H NMR** (500 MHz, CDCl<sub>3</sub>) δ 8.04 (brd, *J* = 7.8 Hz, 1H), 7.94 (brd, *J* = 8.3 Hz, 1H), 7.90 – 7.89 (m, 1H), 7.72 (d, *J* = 7.1 Hz, 1H), 7.61 (d, *J* = 8.2 Hz, 1H), 7.52 – 7.49 (m, 4H), 7.38 (t, *J* = 7.7 Hz, 1H), 7.27 (t, *J* = 7.5 Hz, 1H), 7.16 – 7.15 (m, 4H), 7.09 – 7.05 (m, 1H). **<sup>13</sup>C NMR** (125 MHz, CDCl<sub>3</sub>) δ 159.3, 154.9, 136.4, 133.9, 132.1, 130.6, 129.8, 129.8, 129.1,

128.6, 127.0, 126.9, 126.8, 126.3, 126.0, 125.6, 125.4, 125.1, 123.7, 120.8, 111.8, 108.2.

<sup>11</sup> J. S. Han, Y. Shao, X.-H. Zhang and P. Zhong, *Phosphorus, Sulfur Silicon Relat. Elem.*, 2013, **188**, 1599–1610.

## 2. Green Chemistry Metrics

**Table 1.** Experimental data for calculation of Reaction yield, E-factor, Atom economy, Atom efficiency, Carbon efficiency, Reaction Mass Efficiency, stoichiometric factor, Material Recovery Potential.

| PART 1: RAW MATERIALS USAGE                  |            |                           |                       |                    |                 |                 |          |               |
|----------------------------------------------|------------|---------------------------|-----------------------|--------------------|-----------------|-----------------|----------|---------------|
| <b>(A) REACTION STAGE:</b>                   |            |                           |                       |                    |                 |                 |          |               |
| <b>Reaction Scale</b>                        | 2.50E-04   |                           |                       |                    |                 |                 |          |               |
| <b>(i) REAGENTS</b>                          | MW (g/mol) | <i>Theoretical Stoich</i> | MW (g/mol)            | Used Stoich        | MW (g/mol)      | Moles           | Mass (g) | Carbon number |
| 2-(phenylethynyl) alkynylanisole             | 208.25     | 1                         | 208.25                | 1                  | 208.25          | 2.50E-04        | 0.0521   | 15            |
| 1,2-diphenyl diselenide                      | 312.13     | 0.5                       | 156.065               | 0.55               | 171.6715        | 1.38E-04        | 0.0429   | 6             |
| Tetrabromomethane                            | 331.62     | 1                         | 331.62                | 1                  | 331.62          | 2.50E-04        | 0.0829   | 1             |
| <i>TOTAL REAGENTS</i>                        |            |                           | 695.935               |                    | 711.5415        |                 | 0.1779   | <b>22</b>     |
| <b>(ii) SOLVENTS</b>                         |            |                           | <u>Density (g/mL)</u> | <u>Volume (mL)</u> |                 | <u>Mass (g)</u> |          |               |
| Acetonitrile                                 |            |                           | 0.786                 | 1                  |                 | 0.786           |          |               |
| <i>TOTAL SOLVENTS</i>                        |            |                           |                       |                    |                 | 0.786           |          |               |
| <b>Reaction Materials Subtotals</b>          |            |                           |                       |                    |                 | 0.9639          |          |               |
| <b>(B) WORK-UP STAGE:</b>                    |            |                           |                       |                    |                 |                 |          |               |
| MATERIAL USED                                |            |                           | <u>Density (g/mL)</u> | <u>Volume (mL)</u> |                 | <u>Mass (g)</u> |          |               |
| <i>TOTAL WORK-UP MATERIALS</i>               |            |                           |                       |                    |                 | 0               |          |               |
| <b>(C) PURIFICATION STAGE:</b>               |            |                           |                       |                    |                 |                 |          |               |
| MATERIAL                                     |            |                           | <u>Density (g/mL)</u> | <u>Volume (mL)</u> |                 | <u>Mass (g)</u> |          |               |
| Silica                                       |            |                           |                       |                    |                 | 5               |          |               |
| Hexane                                       |            |                           | 0.661                 | 80                 |                 | 52.88           |          |               |
|                                              |            |                           |                       |                    | Total           | 57.88           |          |               |
| Material recycled                            |            |                           | <u>Density (g/mL)</u> | <u>Volume (mL)</u> |                 | <u>Mass (g)</u> |          |               |
| Hexane                                       |            |                           | 0.661                 | 68                 |                 | 44.948          |          |               |
|                                              |            |                           |                       |                    | Total           | 44.948          |          |               |
| <i>TOTAL PURIFICATION MATERIALS</i>          |            |                           |                       |                    | 12.932          |                 |          |               |
| <b>Post-reaction Materials Subtotals</b>     |            |                           |                       |                    | 12.932          |                 |          |               |
|                                              |            |                           |                       |                    | <b>Mass (g)</b> |                 |          |               |
| <b>TOTAL INPUT MATERIALS (reclaiming)</b>    |            |                           |                       |                    | 13.90           |                 |          |               |
| <b>TOTAL INPUT MATERIALS (no reclaiming)</b> |            |                           |                       |                    | 58.84           |                 |          |               |

| <b>(E) PRODUCT INFORMATION</b>                  |                   | <b>Mass (g)</b> | <b>MW (g/mol)</b> | <b>Moles</b> | <b>Mol (Limiting)</b> | <u>Carbon number</u> |
|-------------------------------------------------|-------------------|-----------------|-------------------|--------------|-----------------------|----------------------|
| selenylbenzo[b]furan                            |                   | 0.08557         | 349.29            | 0.00024      | 2.50E-04              | 20                   |
| <b>PART 2: GREEN METRICS ANALYSIS</b>           |                   |                 |                   |              |                       |                      |
|                                                 |                   | Obtained        | Ideal             |              |                       |                      |
| <b>(i) Reaction yield</b>                       | Rx Yield          | 0.980           | 1                 |              |                       |                      |
| <b>(ii) E-factor</b>                            | E-factor          | 162.39          |                   |              |                       |                      |
| <b>(iii) Atom economy</b>                       | AE                | 0.502           | 1                 | without CBr4 | 0.959                 |                      |
| <b>(iv) Atom efficiency</b>                     | Atom efficiency   | 0.492           | 1                 |              |                       |                      |
| <b>(v) Carbon efficiency</b>                    | Carbon efficiency | 0.909           | 1                 |              |                       |                      |
| <b>(vi) Reaction Mass Efficiency (RME)</b>      | RME               | 0.481           | 1                 |              |                       |                      |
| <b>(vii) stoichiometric factor (SF)</b>         | SF                | 1.022           | 1                 |              |                       |                      |
| <b>(viii) Material Recovery Potential (MRP)</b> | MRP               | 0.764           | 1                 |              |                       |                      |

**Table 2.** Calculation of EcoScale parameter.

| The penalty points to calculate the EcoScale       |                               |                |                |
|----------------------------------------------------|-------------------------------|----------------|----------------|
| Parameter                                          |                               | for <b>3a</b>  | for <b>3z</b>  |
|                                                    |                               | Penalty points | Penalty points |
| 1. Yield                                           |                               | 1              | 1              |
| 2. Price of reaction components<br>(10 mmol scale) |                               |                |                |
|                                                    | Expensive (< \$30)            | 3              | 3              |
| 3. Safety                                          |                               |                |                |
| Acetonitrile, Diphenyldiselenide                   |                               |                |                |
|                                                    | N (dangerous for environment) | 5              | 5              |
|                                                    | T (toxic)                     | 5              | 0              |
|                                                    | F (highly flammable)          | 5              | 5              |
| 4. Technical setup                                 |                               | 0              | 0              |
| 5. Temperature/time                                |                               |                |                |
|                                                    | Room temperature, < 24 h      | 1              | 1              |
| 6. Workup and purification                         |                               |                |                |
|                                                    | Classical chromatography      | 10             | 10             |
| <b>Ecoscale</b>                                    |                               | <b>70</b>      | <b>75</b>      |

### 3. NMR Characterization

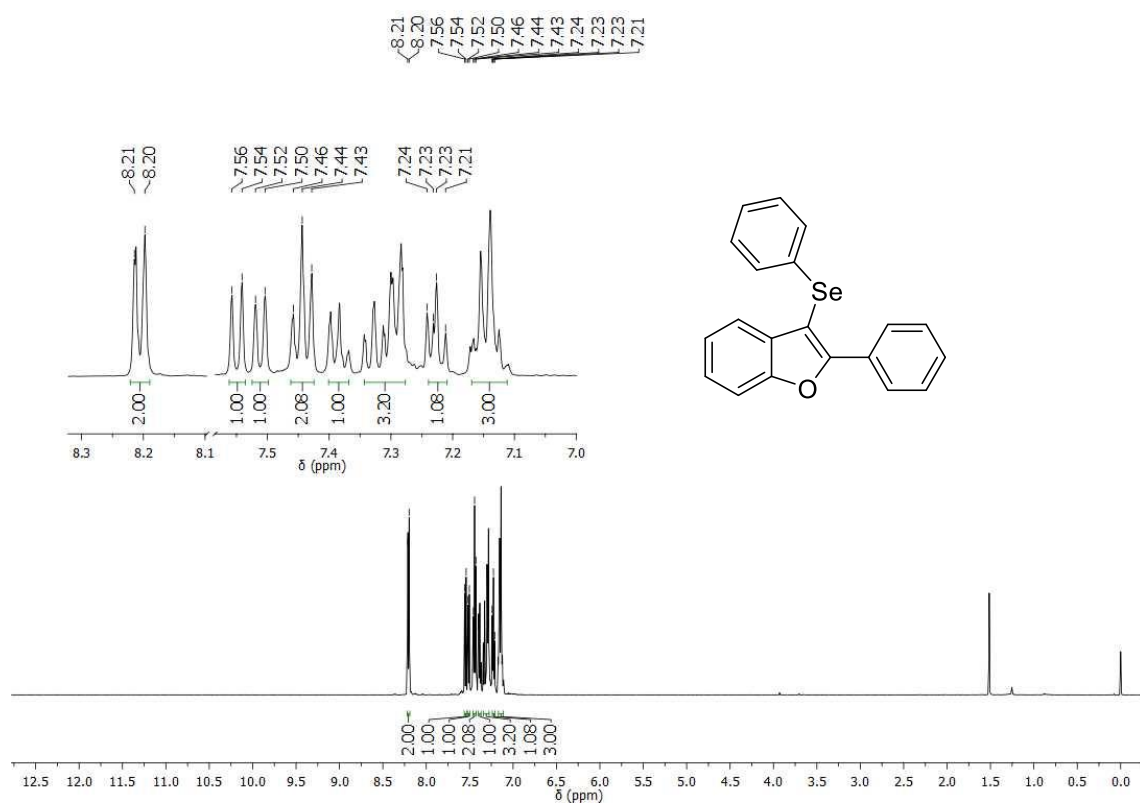

**Figure S1:**  $^1\text{H}$  NMR spectrum (500 MHz,  $\text{CDCl}_3$ ) of compound **3a**

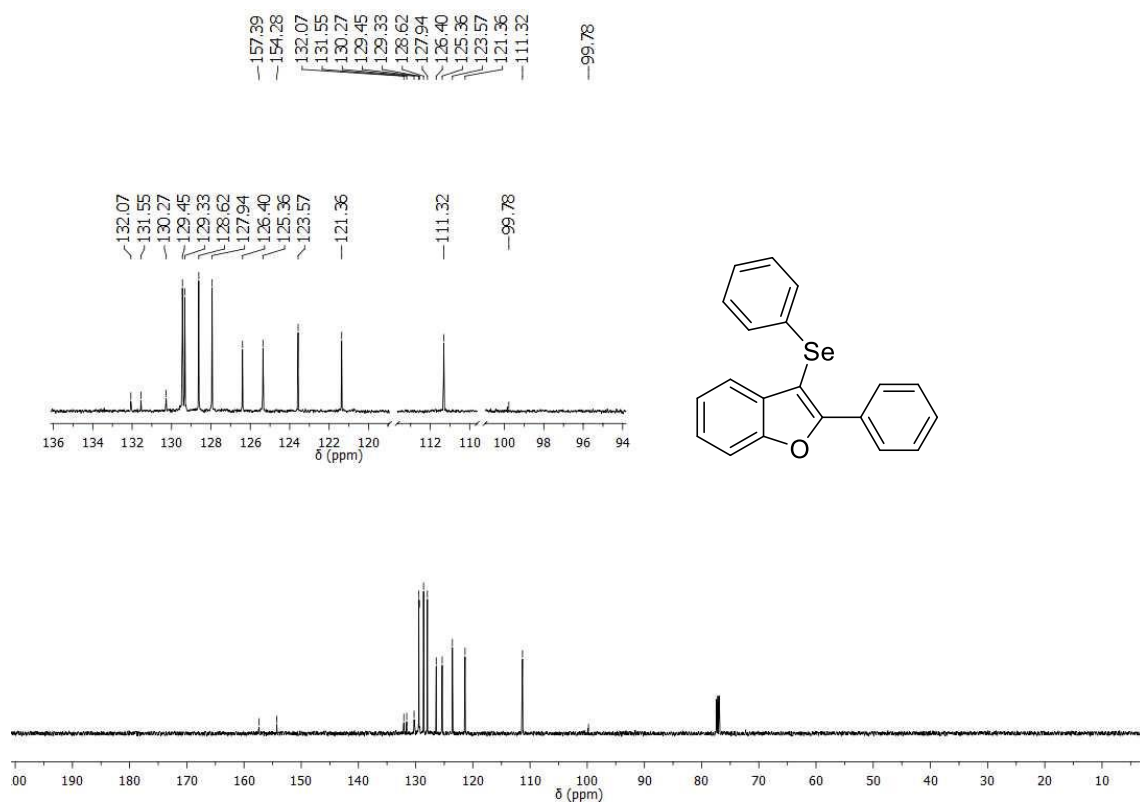

**Figure S2:**  $^{13}\text{C}$  NMR spectrum (125 MHz,  $\text{CDCl}_3$ ) of compound **3a**



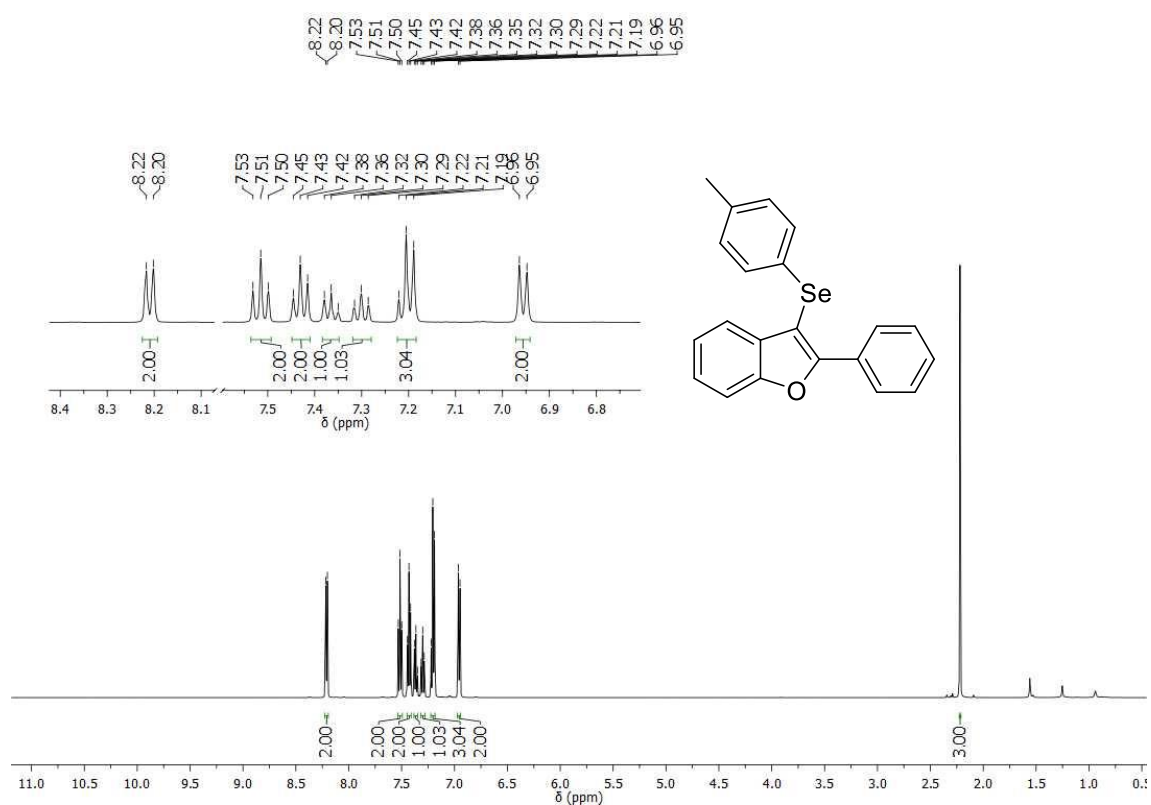

**Figure S3:** <sup>1</sup>H NMR spectrum (500 MHz, CDCl<sub>3</sub>) of compound 3b

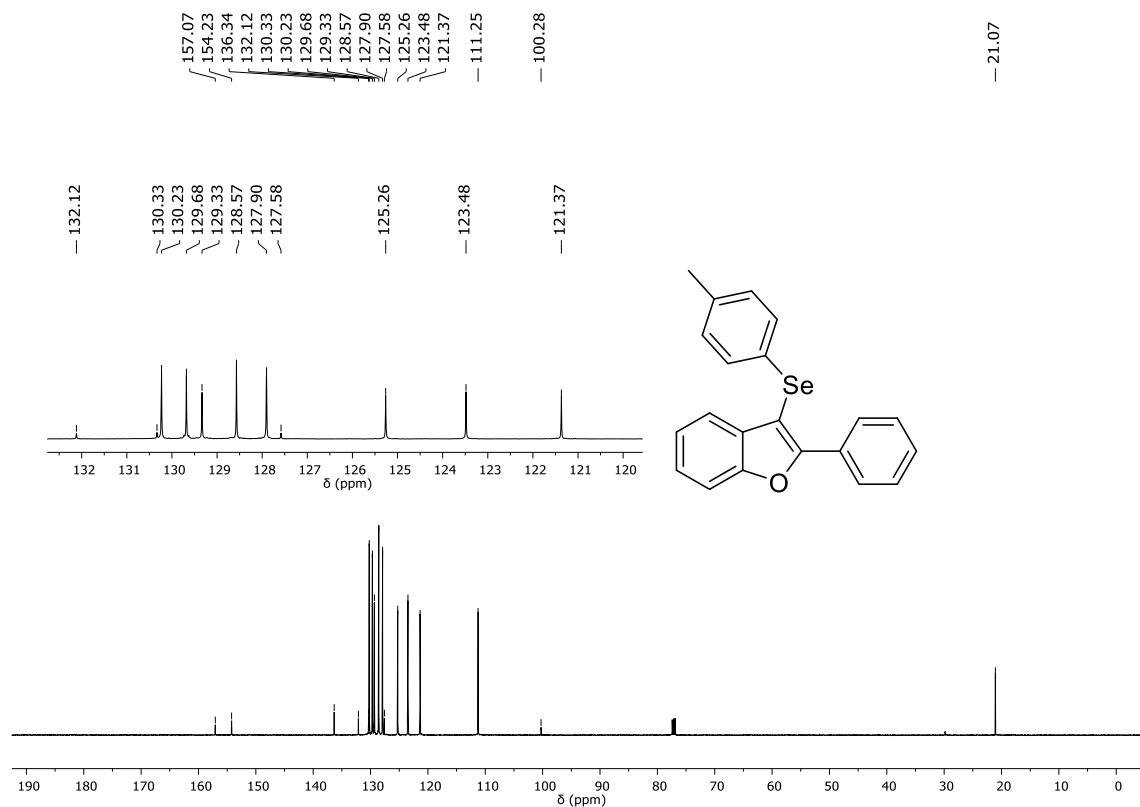

**Figure S4:** <sup>13</sup>C NMR spectrum (125 MHz, CDCl<sub>3</sub>) of compound 3b

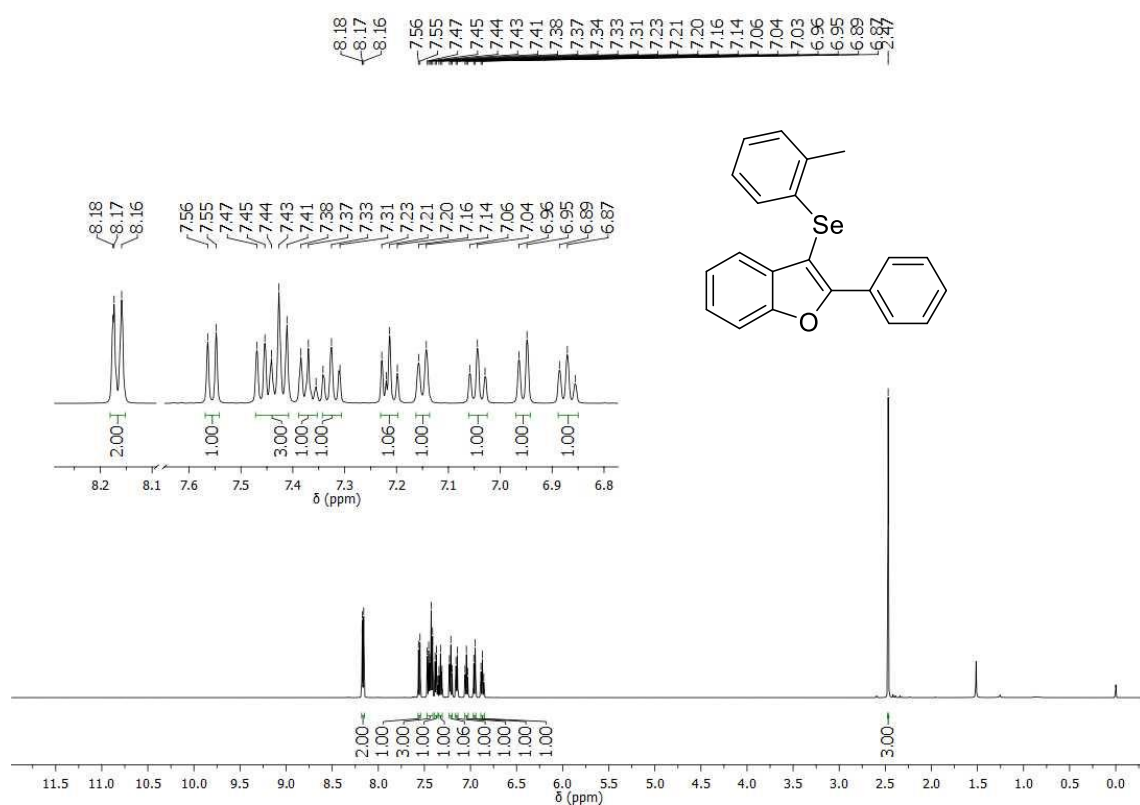

**Figure S5:** <sup>1</sup>H NMR spectrum (500 MHz, CDCl<sub>3</sub>) of compound 3c

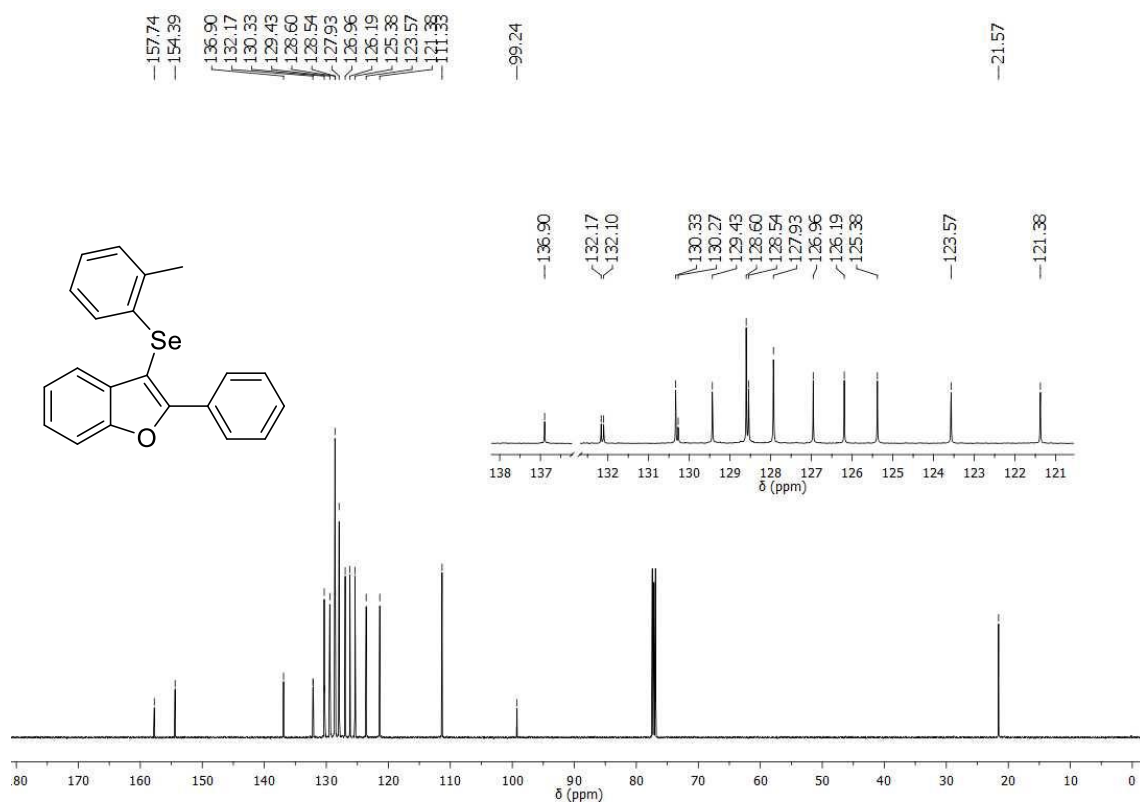

**Figure S6:** <sup>13</sup>C NMR spectrum (125 MHz, CDCl<sub>3</sub>) of compound 3c

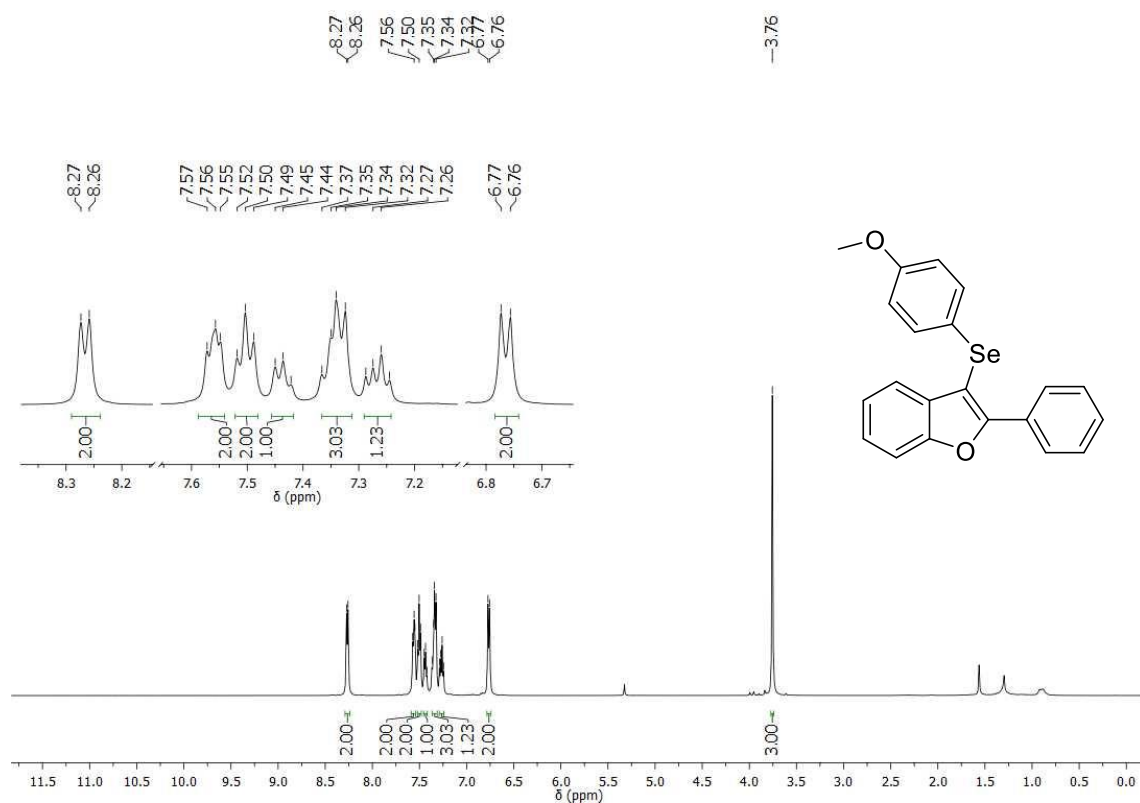

**Figure S7:** <sup>1</sup>H NMR spectrum (500 MHz, CDCl<sub>3</sub>) of compound 3d

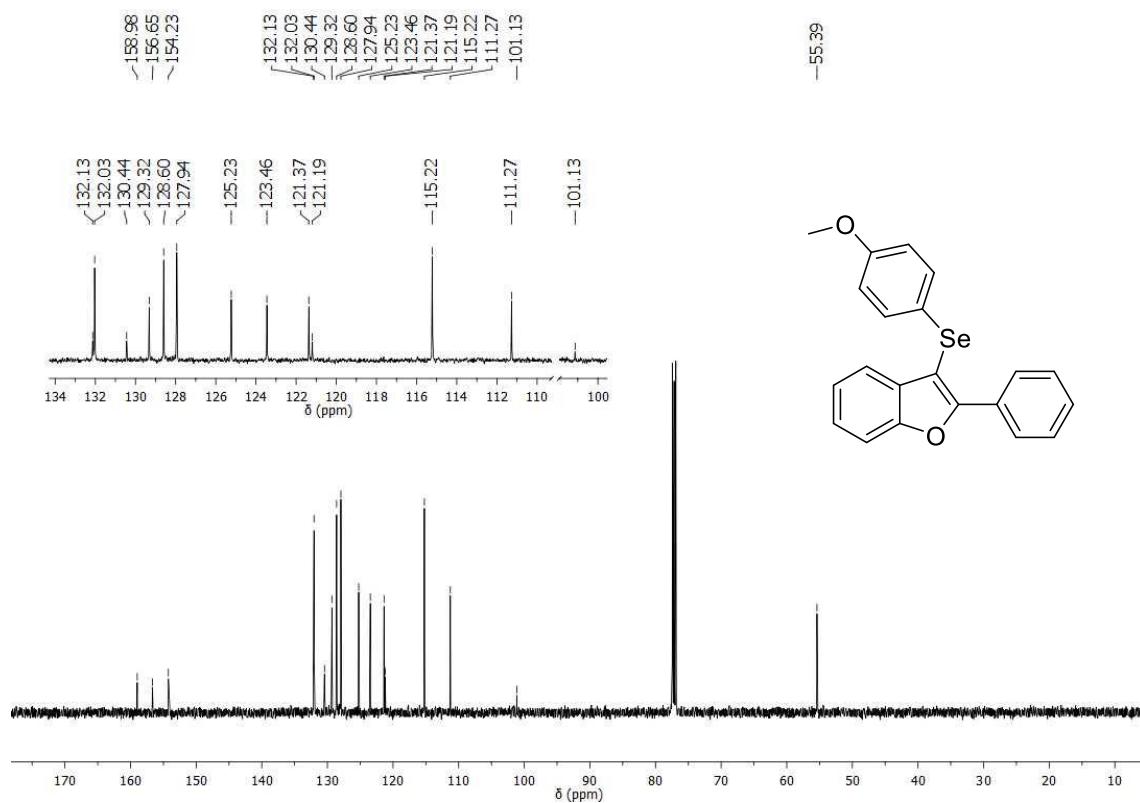

**Figure S8:** <sup>13</sup>C NMR spectrum (125 MHz, CDCl<sub>3</sub>) of compound 3d

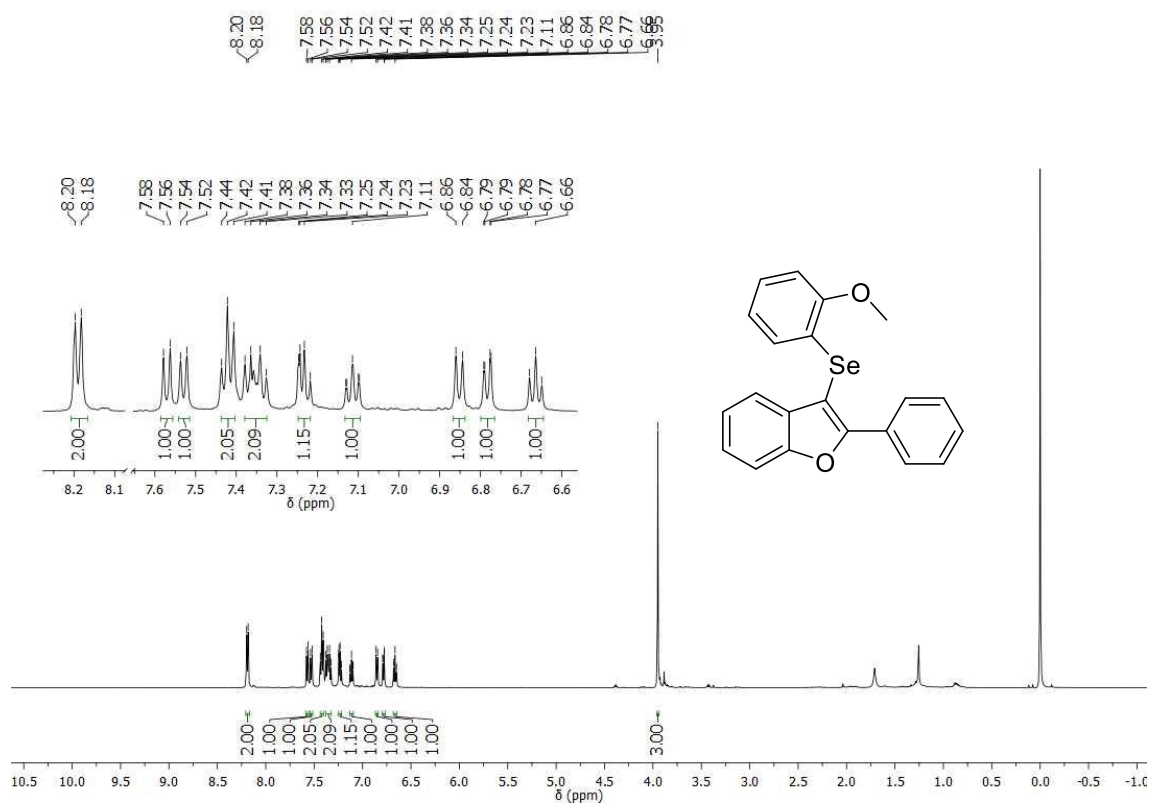

**Figure S9:** <sup>1</sup>H NMR spectrum (500 MHz, CDCl<sub>3</sub>) of compound **3e**

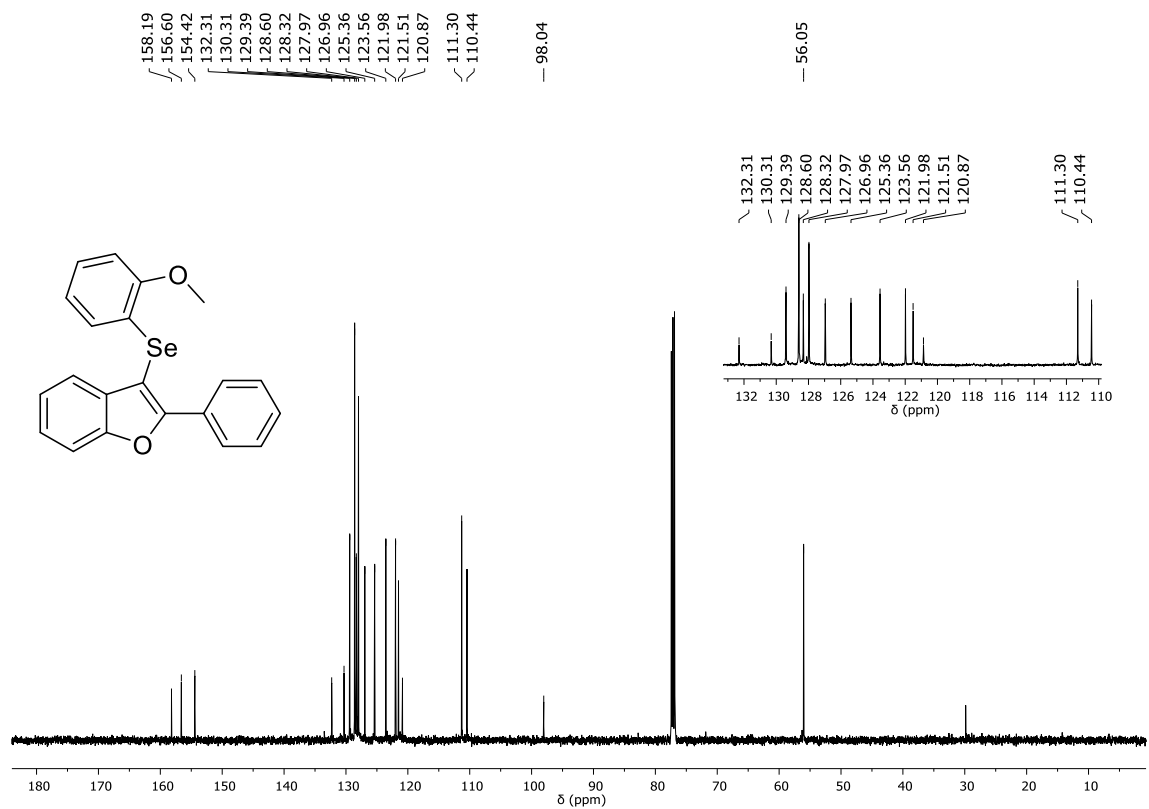

**Figure S10:** <sup>13</sup>C NMR spectrum (125 MHz, CDCl<sub>3</sub>) of compound **3e**

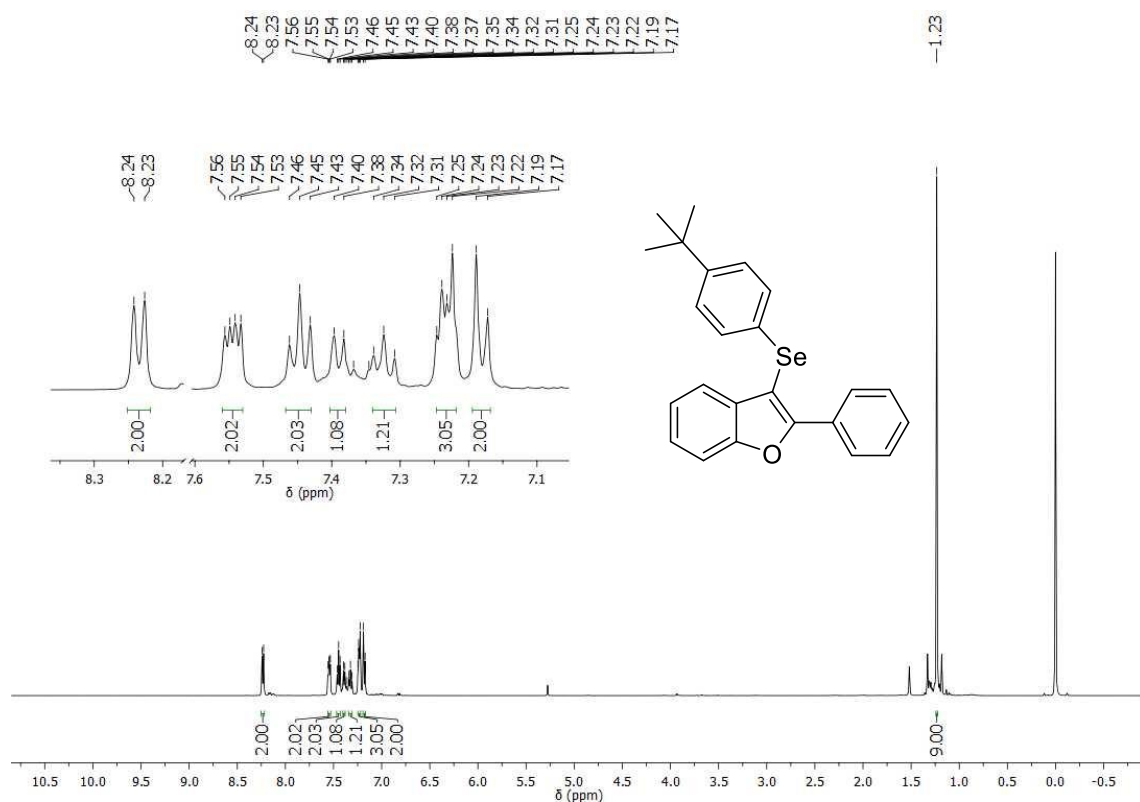

**Figure S11:** <sup>1</sup>H NMR spectrum (500 MHz, CDCl<sub>3</sub>) of compound **3f**

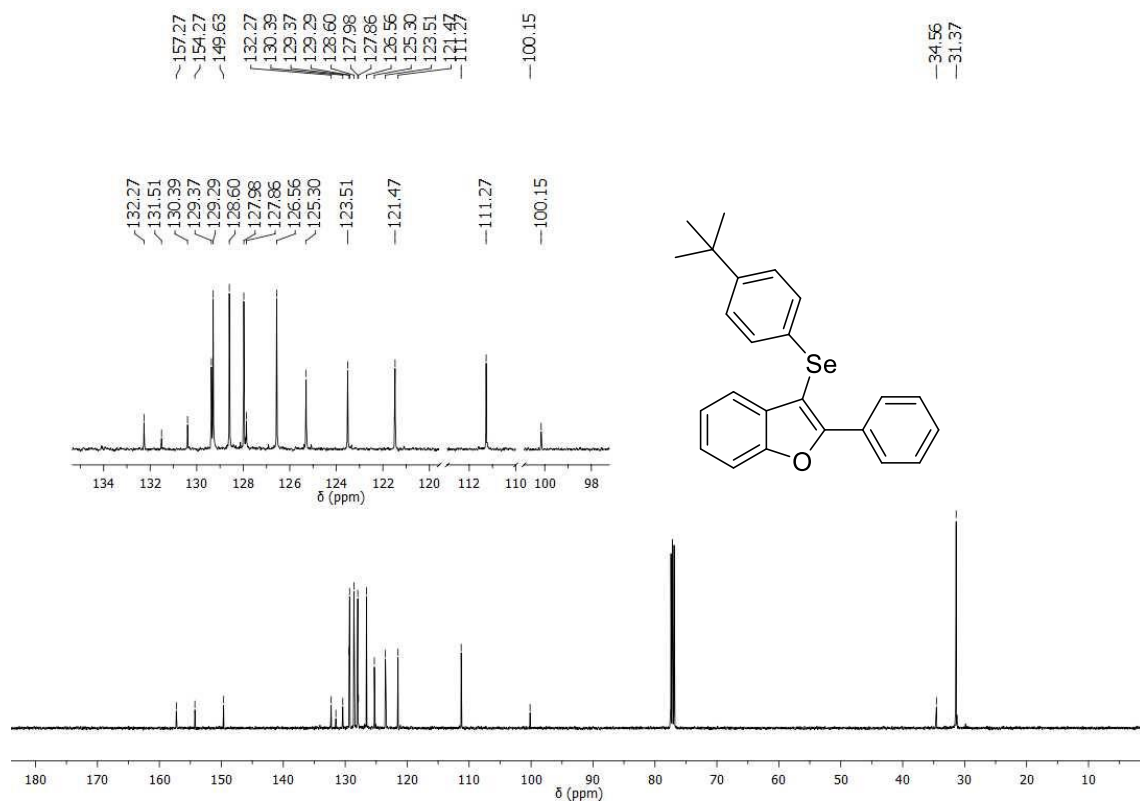

**Figure S12:** <sup>13</sup>C NMR spectrum (125 MHz, CDCl<sub>3</sub>) of compound **3f**



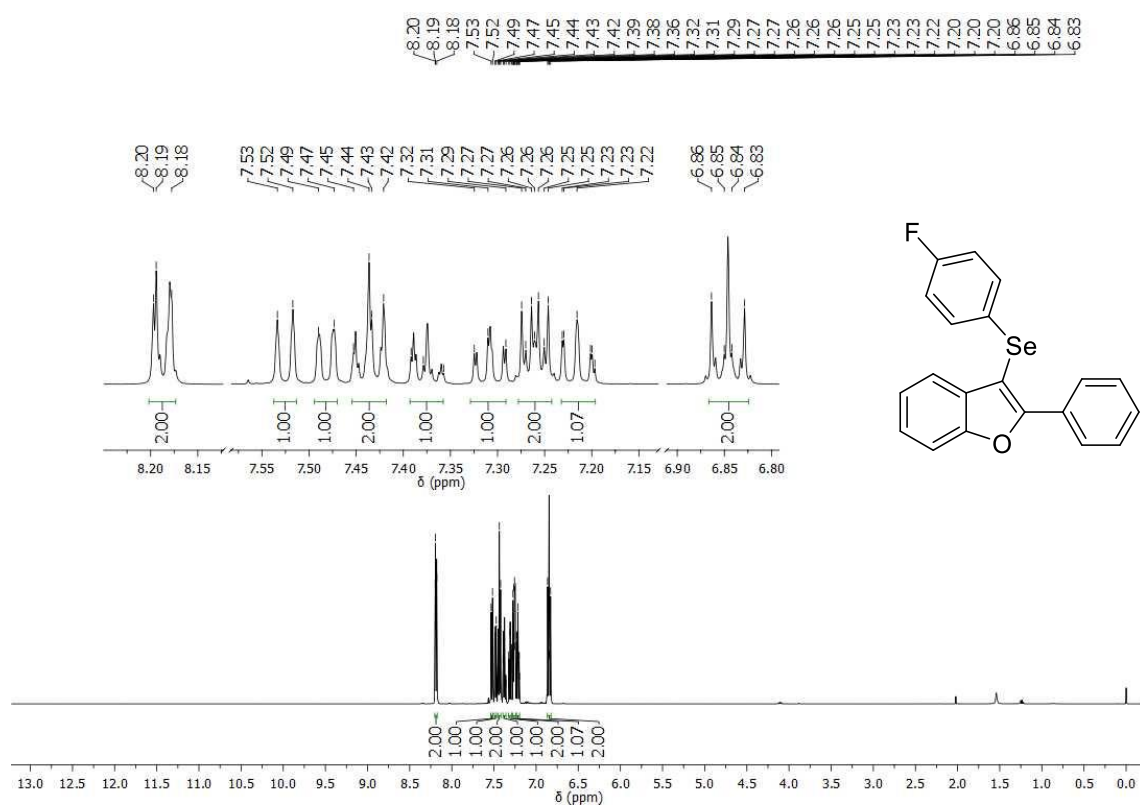

**Figure S15:** <sup>1</sup>H NMR spectrum (500 MHz, CDCl<sub>3</sub>) of compound **3h**

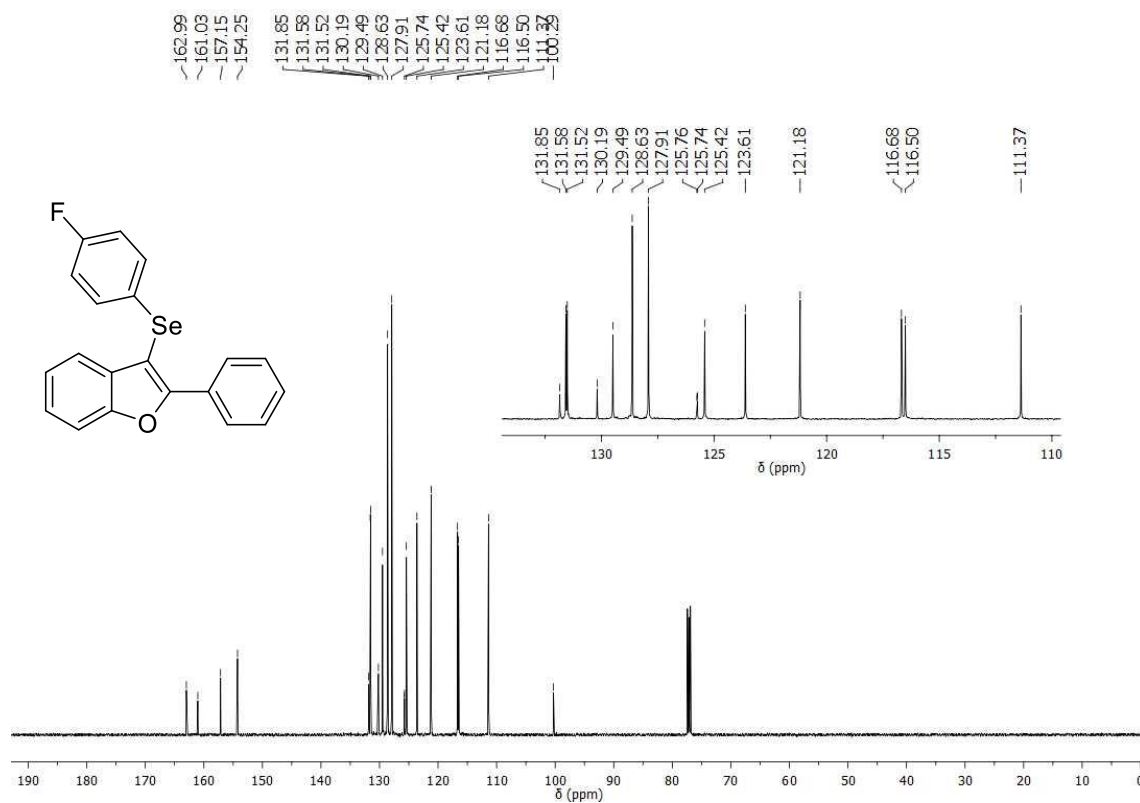

**Figure S16:** <sup>13</sup>C NMR spectrum (125 MHz, CDCl<sub>3</sub>) of compound **3h**

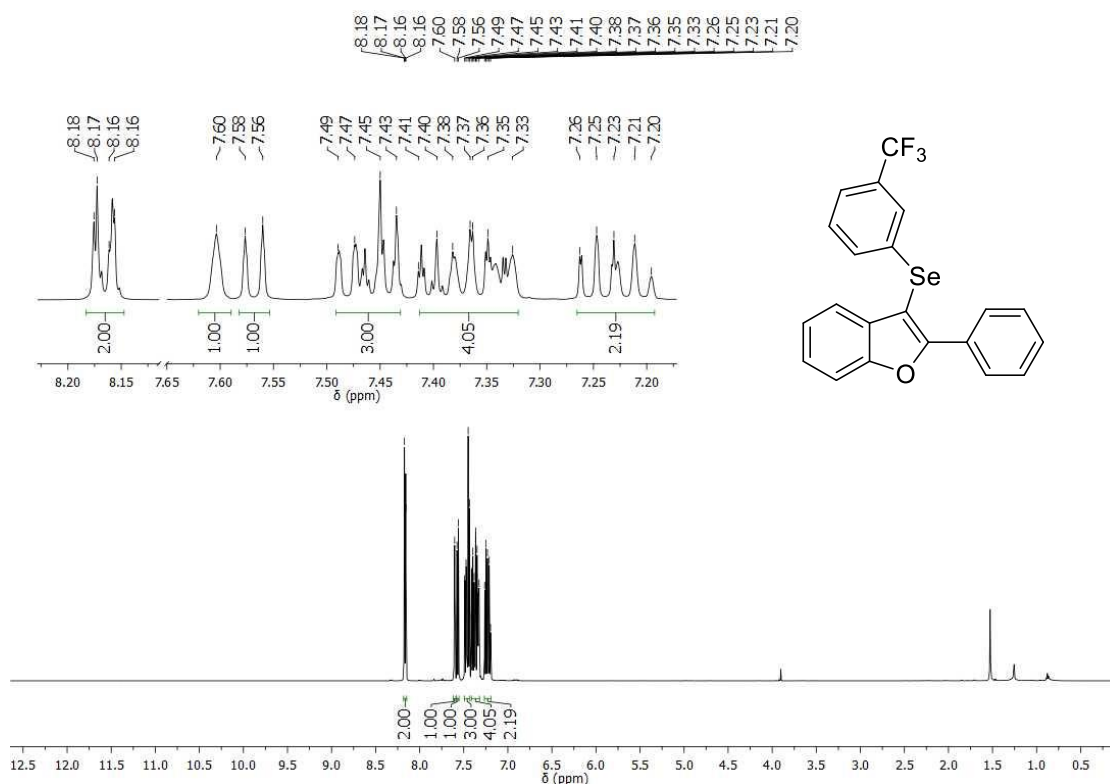

**Figure S17:** <sup>1</sup>H NMR spectrum (500 MHz, CDCl<sub>3</sub>) of compound **3i**

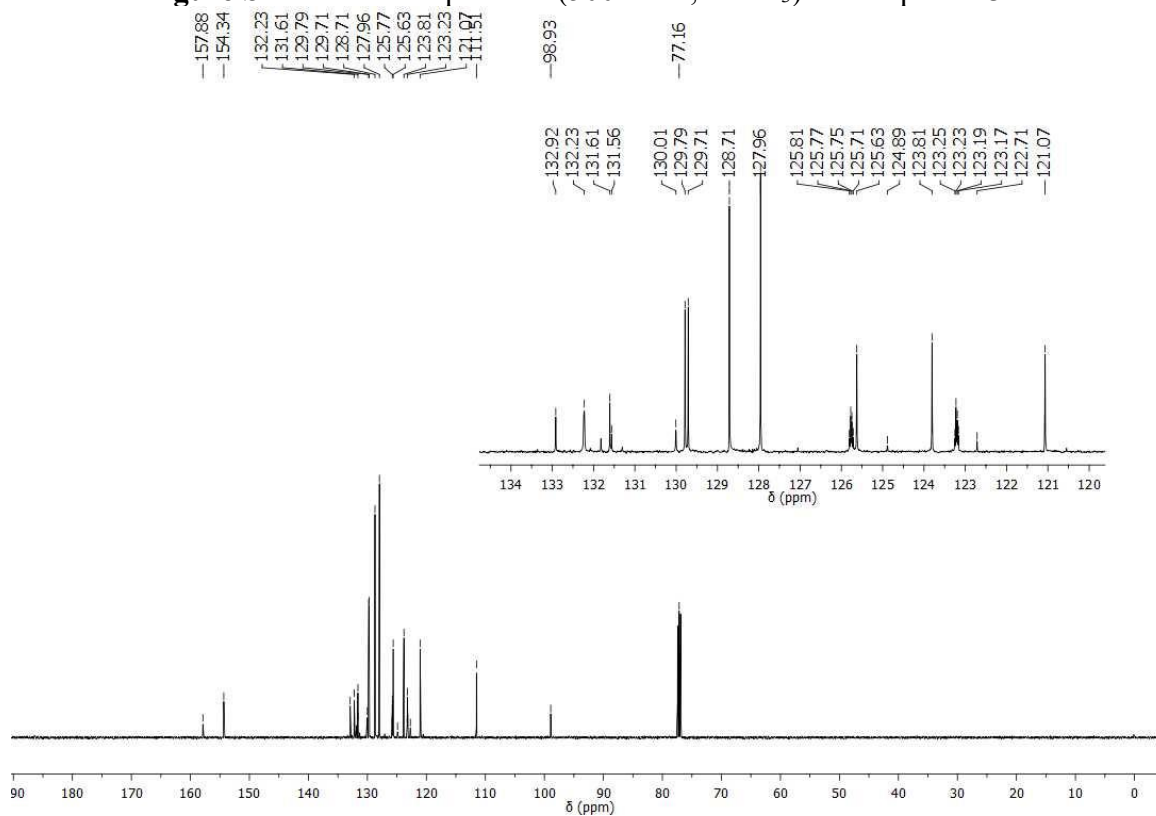

**Figure S18:** <sup>13</sup>C NMR spectrum (125 MHz, CDCl<sub>3</sub>) of compound **3i**



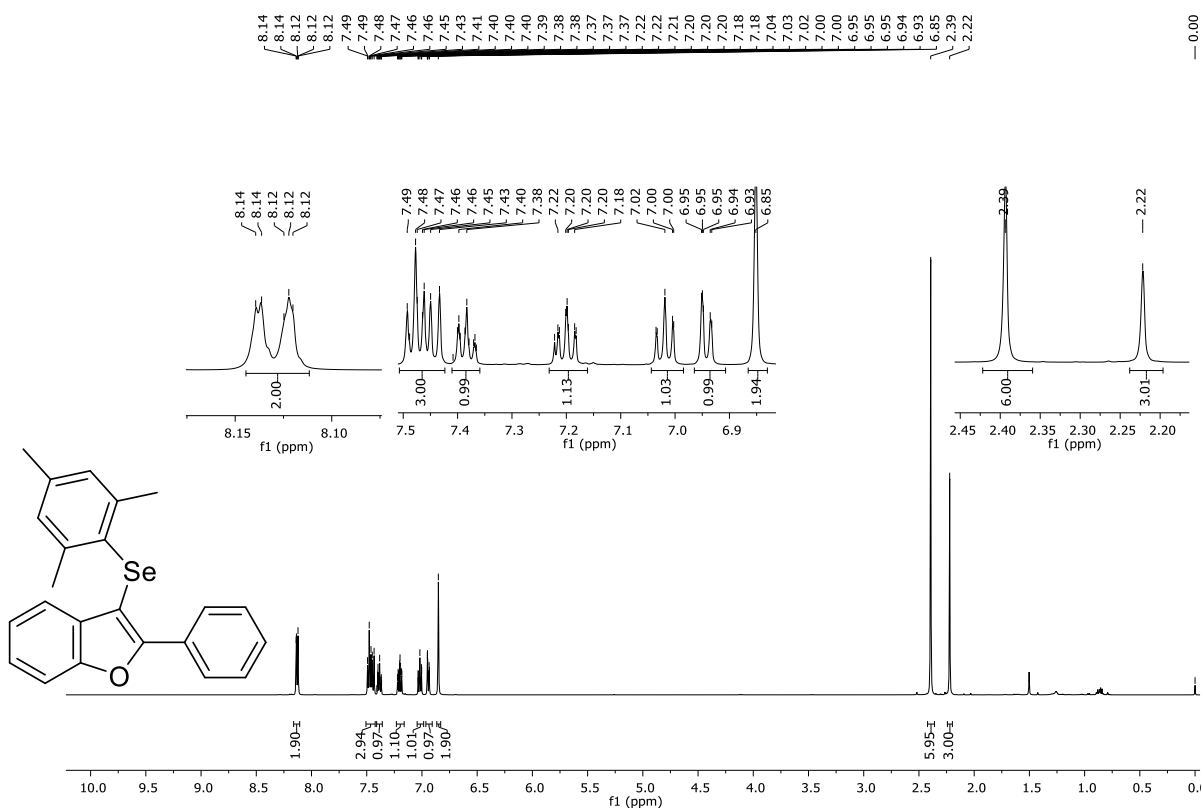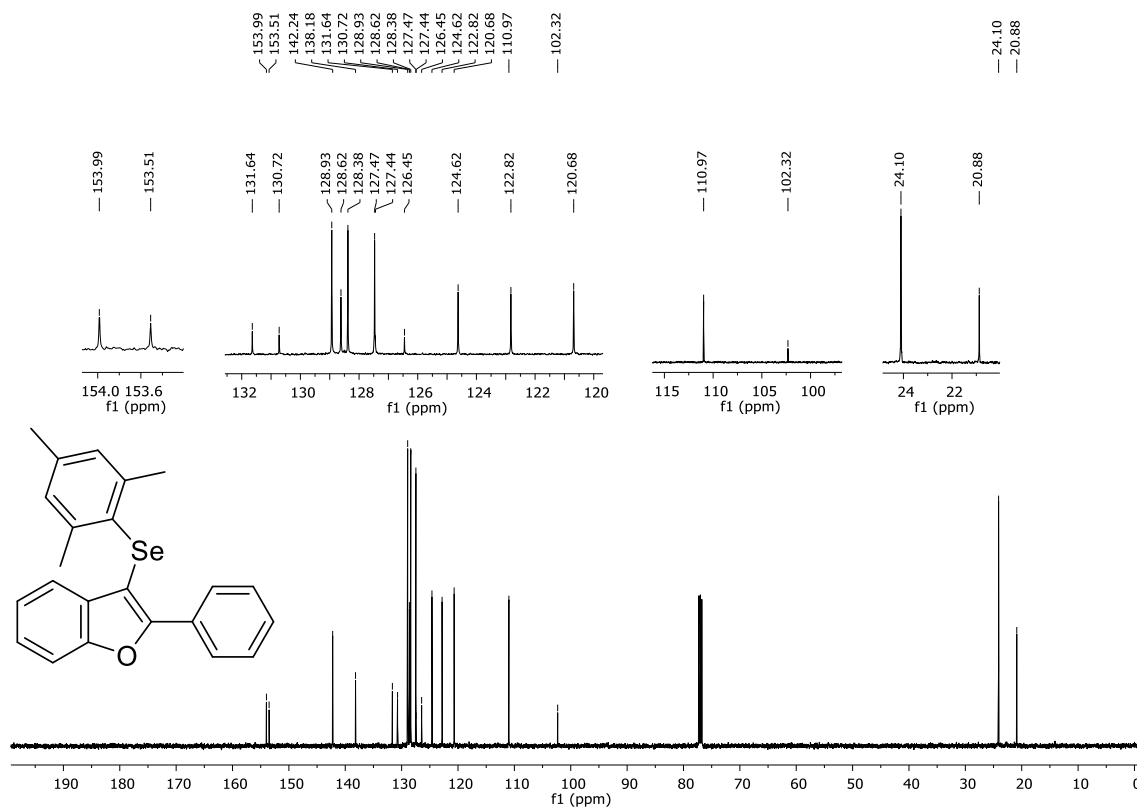

**Figure S20:  $^{13}\text{C}$  NMR spectrum (125 MHz,  $\text{CDCl}_3$ ) of compound **3j****

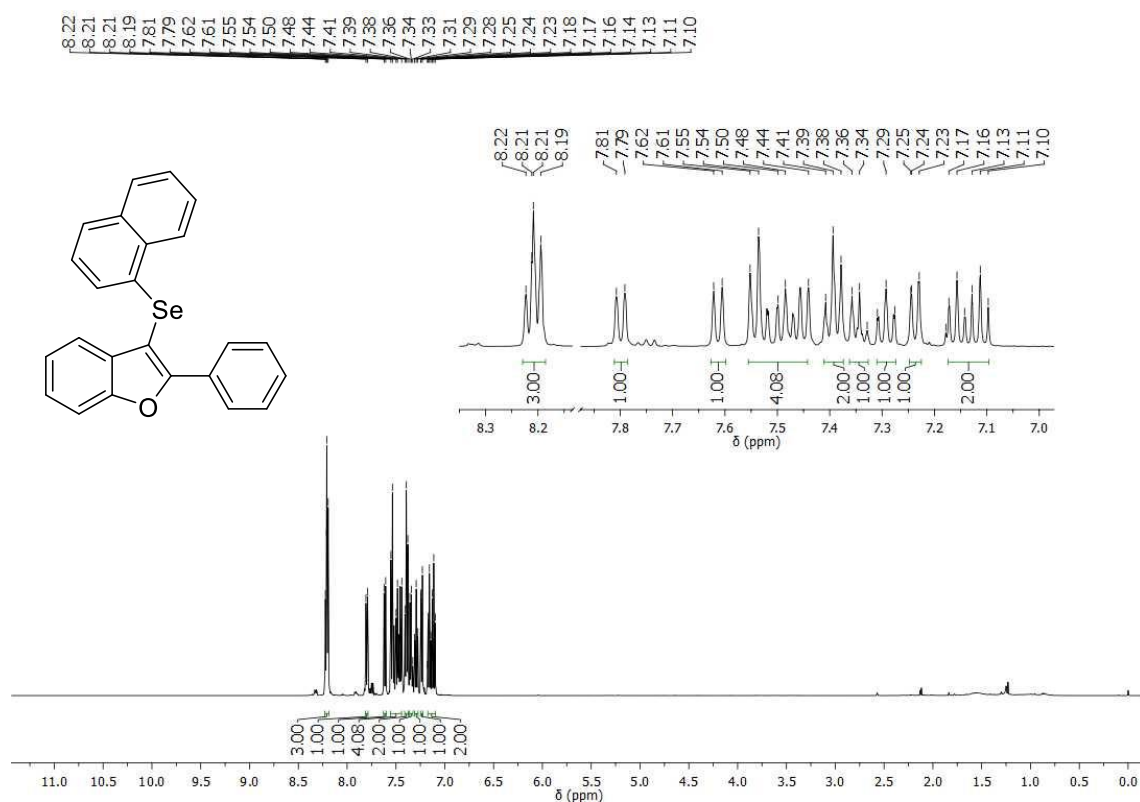

**Figure S21:** <sup>1</sup>H NMR spectrum (500 MHz, CDCl<sub>3</sub>) of compound **3k**

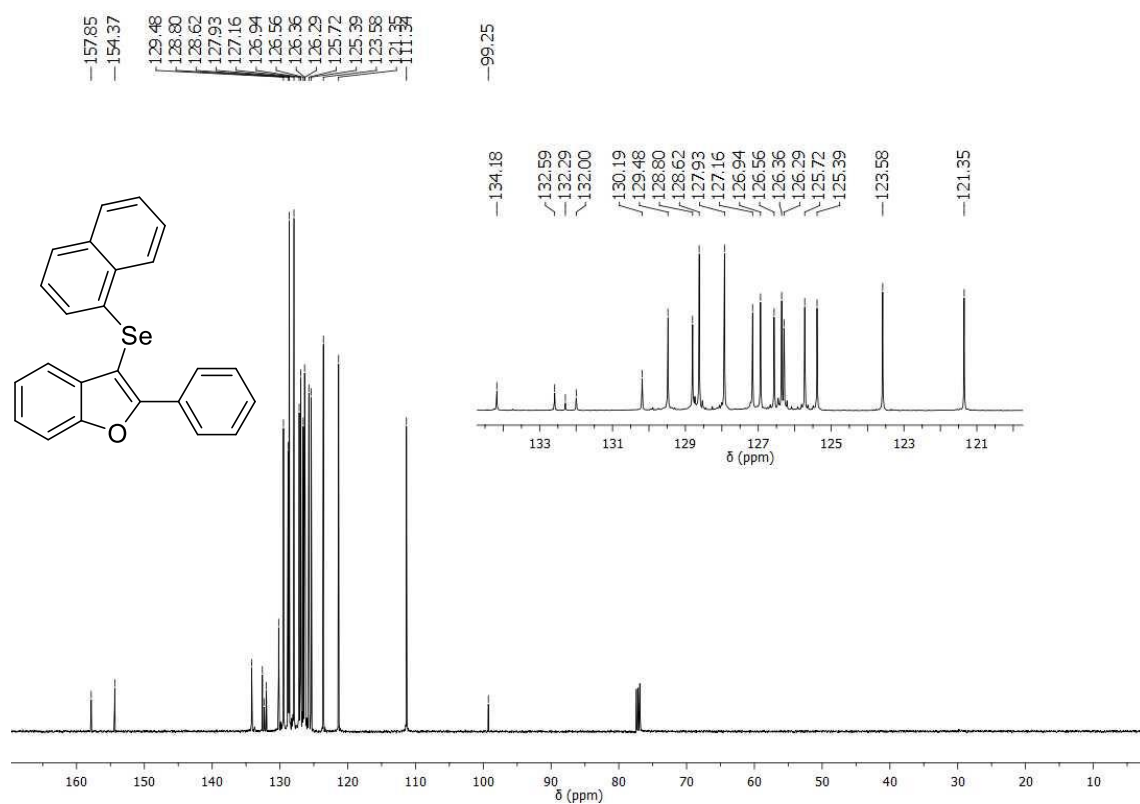

**Figure S22:** <sup>13</sup>C NMR spectrum (125 MHz, CDCl<sub>3</sub>) of compound **3k**

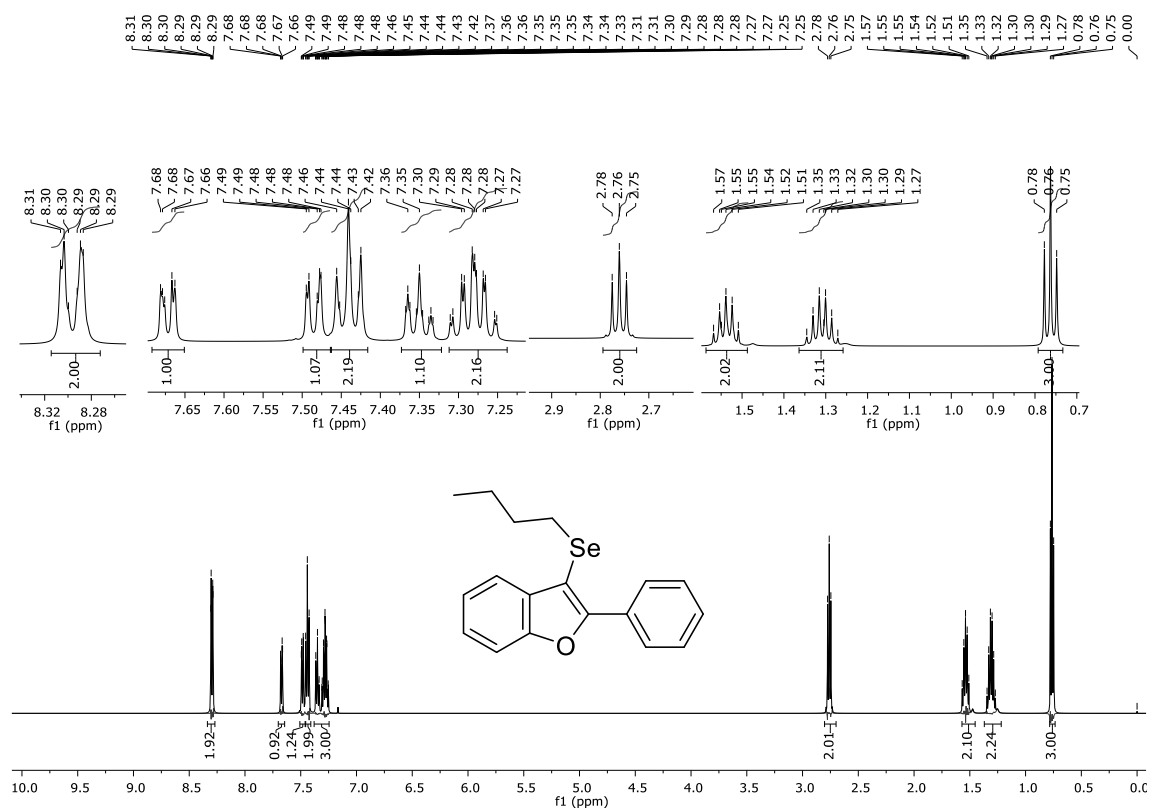

**Figure S23:** <sup>1</sup>H NMR spectrum (500 MHz, CDCl<sub>3</sub>) of compound **31**

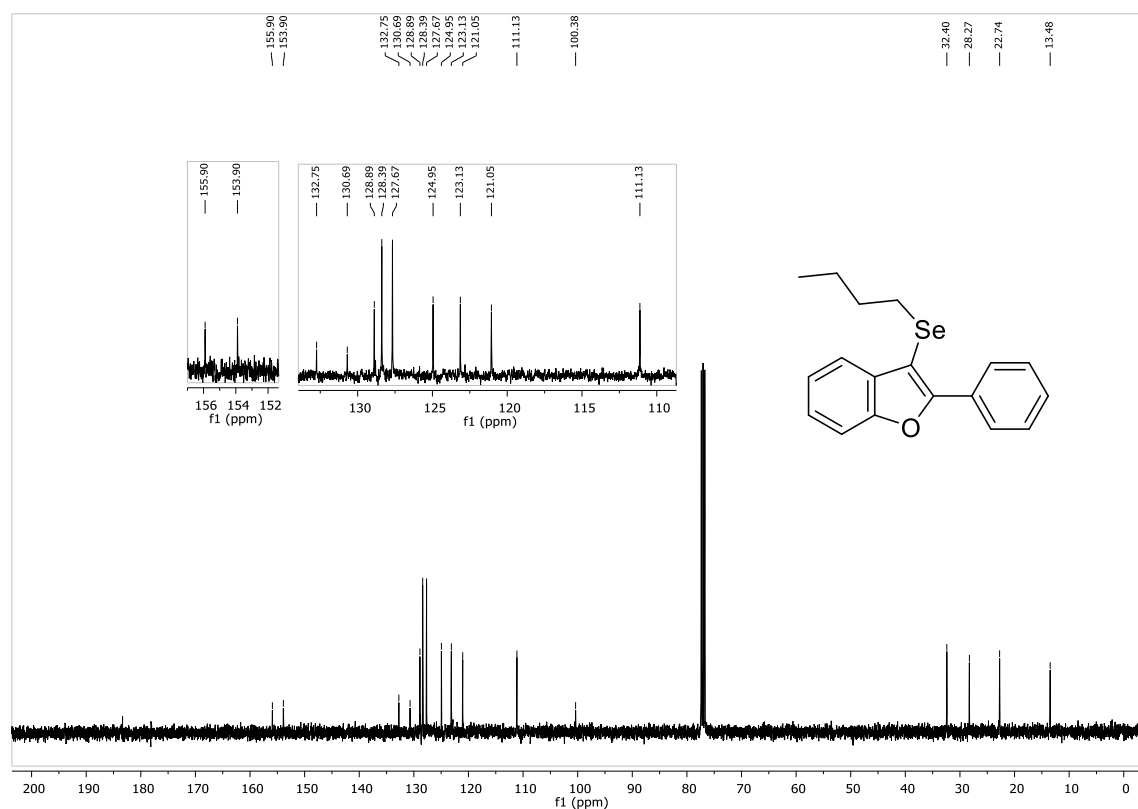

**Figure S24:** <sup>13</sup>C NMR spectrum (125 MHz, CDCl<sub>3</sub>) of compound **31**

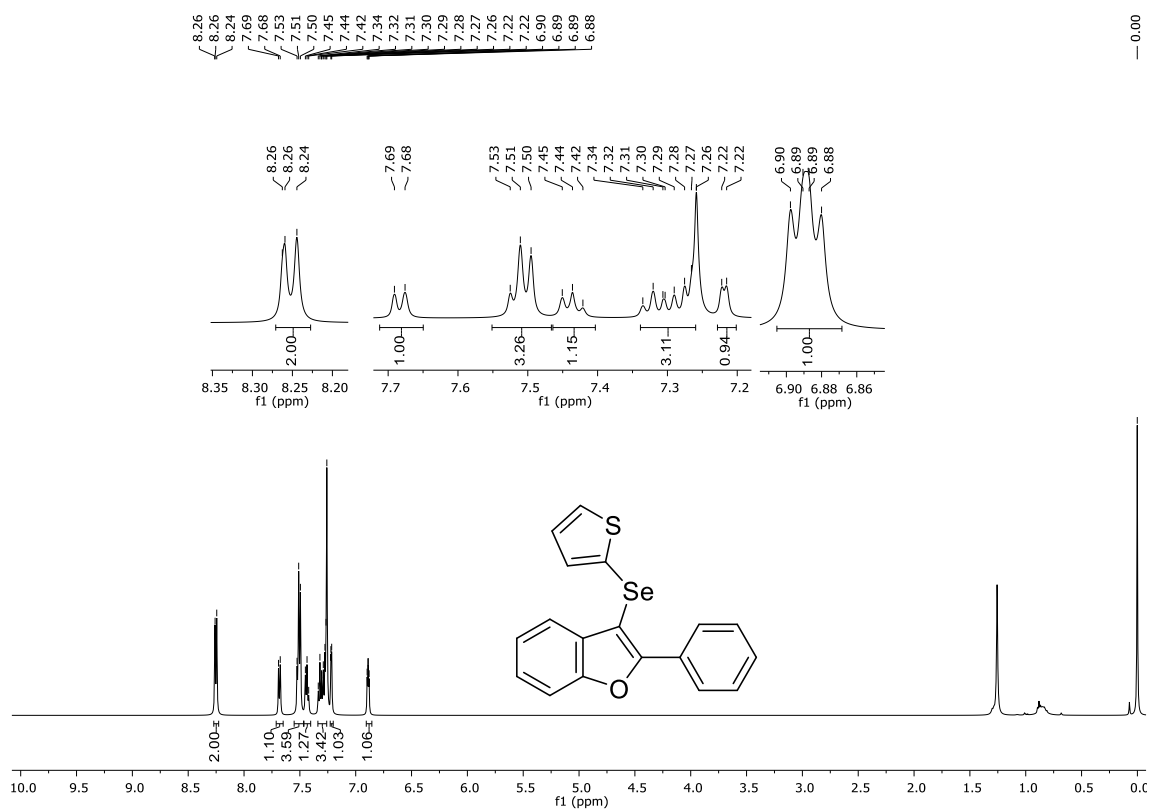

**Figure S25:** <sup>1</sup>H NMR spectrum (500 MHz, CDCl<sub>3</sub>) of compound **3m**

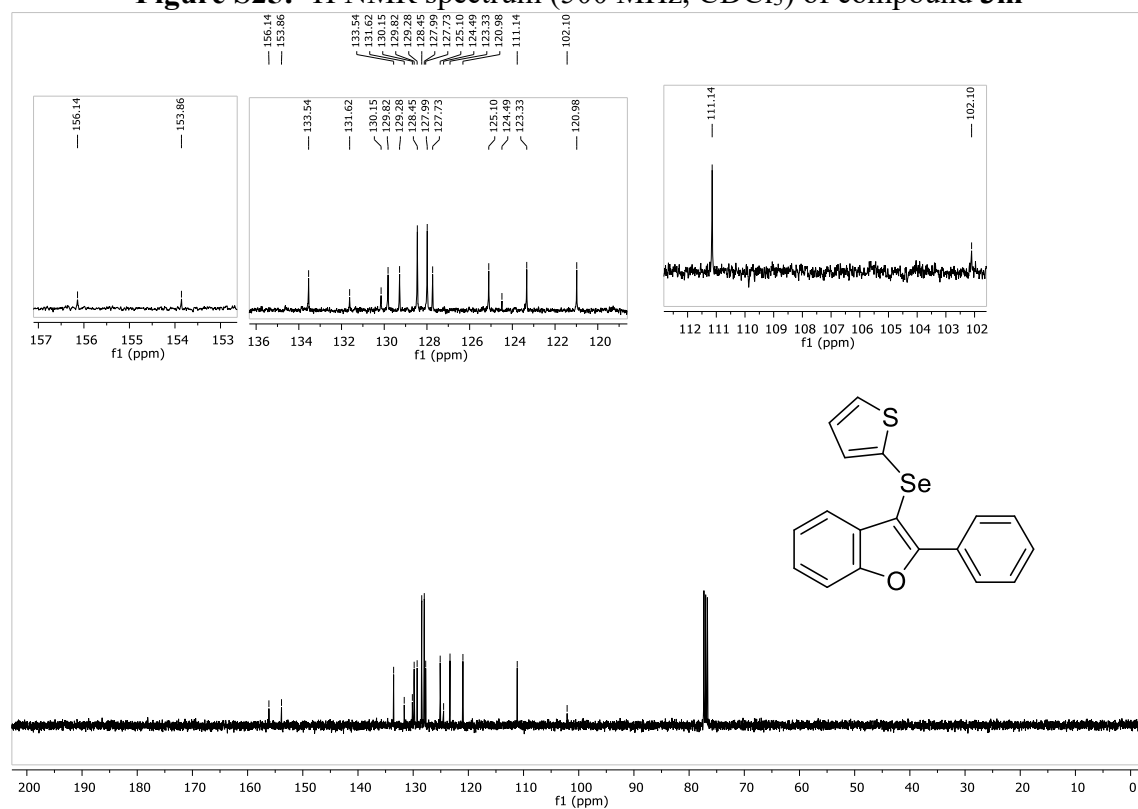

**Figure S26:** <sup>13</sup>C NMR spectrum (125 MHz, CDCl<sub>3</sub>) of compound **3m**

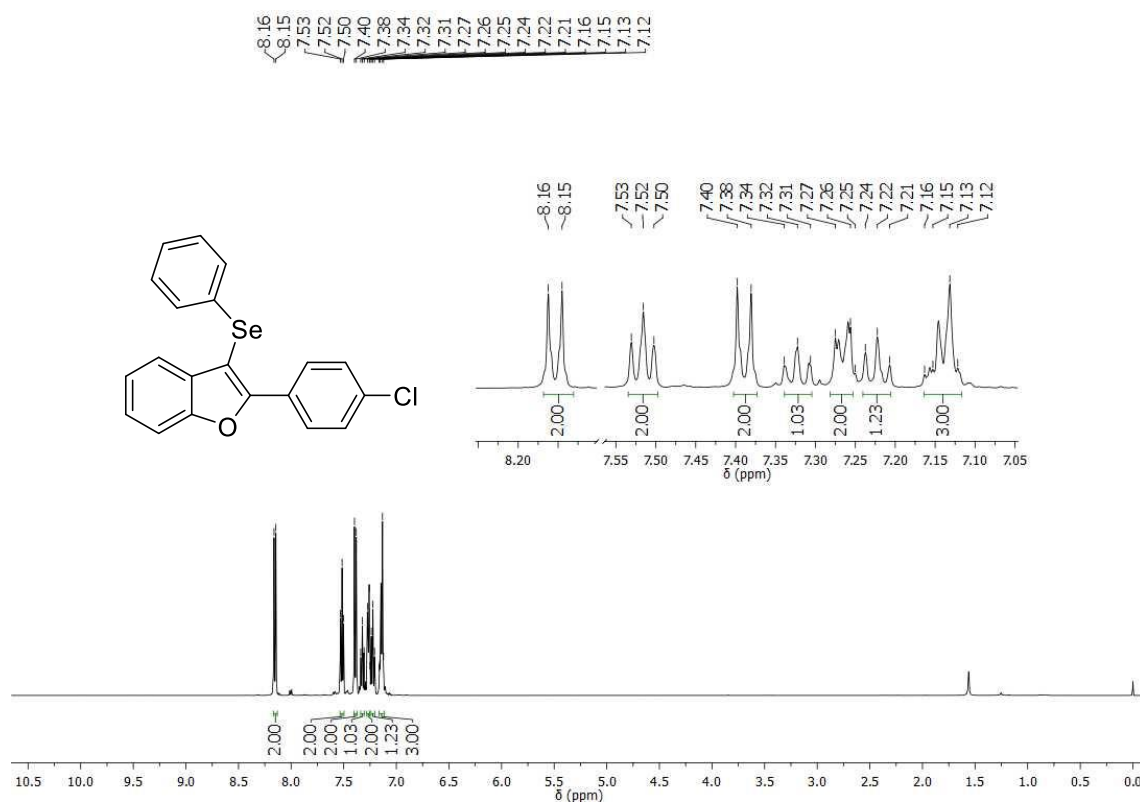

**Figure S27:** <sup>1</sup>H NMR spectrum (500 MHz, CDCl<sub>3</sub>) of compound **3n**

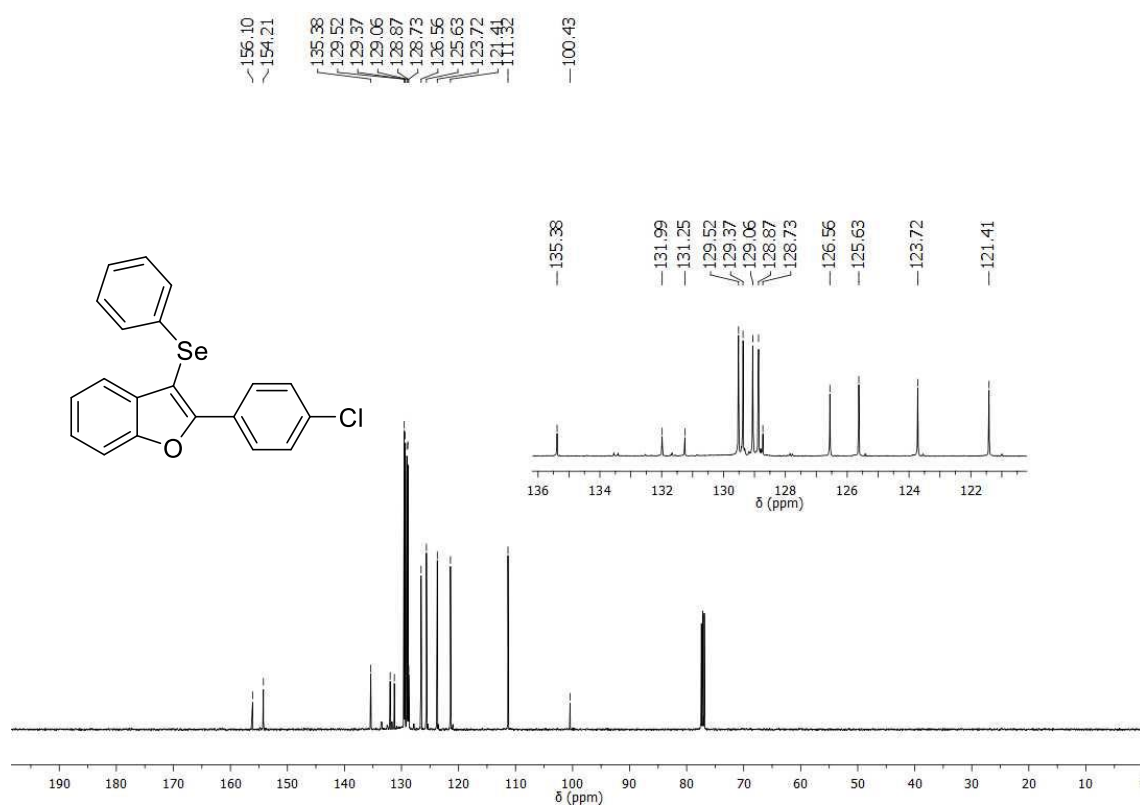

**Figure S28:** <sup>13</sup>C NMR spectrum (125 MHz, CDCl<sub>3</sub>) of compound **3n**

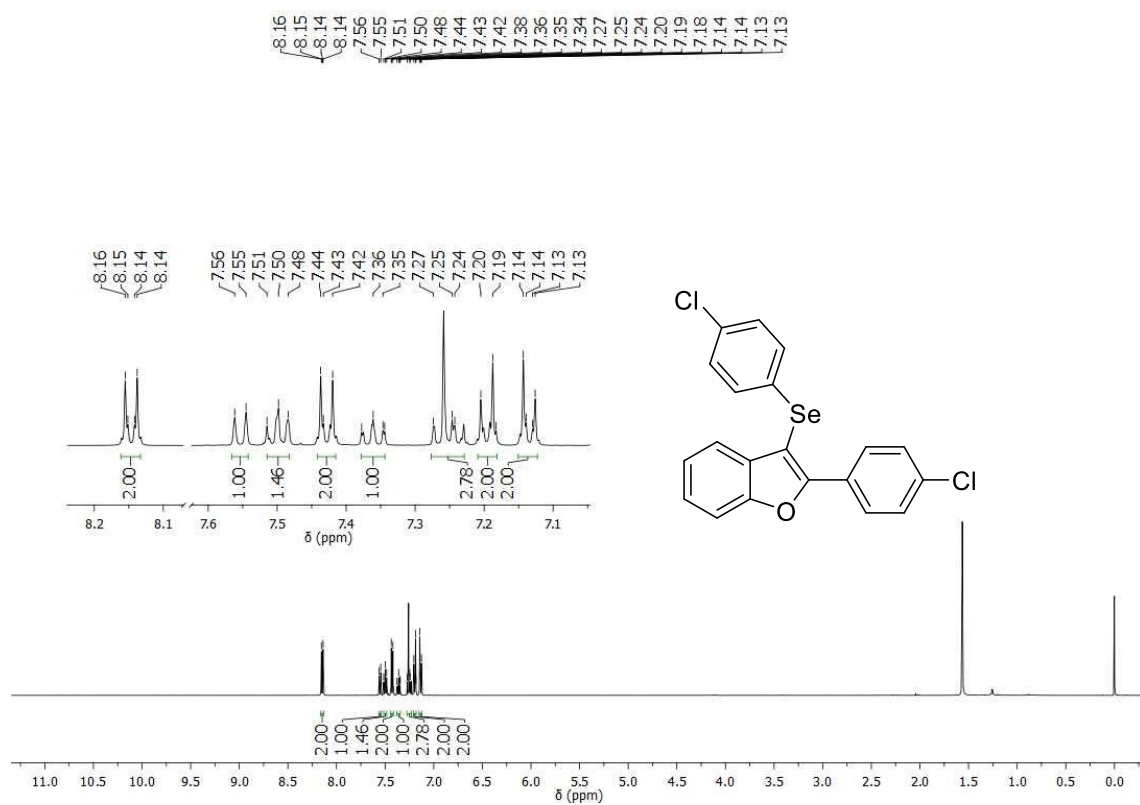

**Figure S29:** <sup>1</sup>H NMR spectrum (500 MHz, CDCl<sub>3</sub>) of compound **3p**

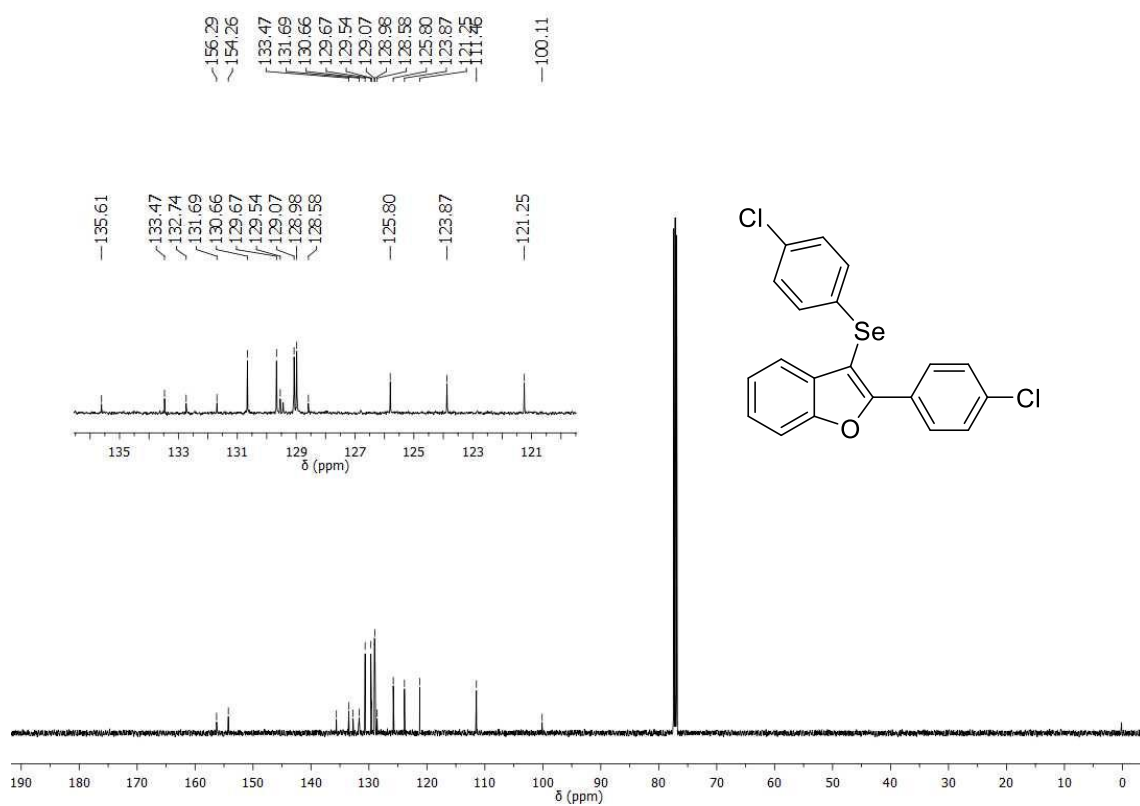

**Figure S30:** <sup>13</sup>C NMR spectrum (125 MHz, CDCl<sub>3</sub>) of compound **3p**

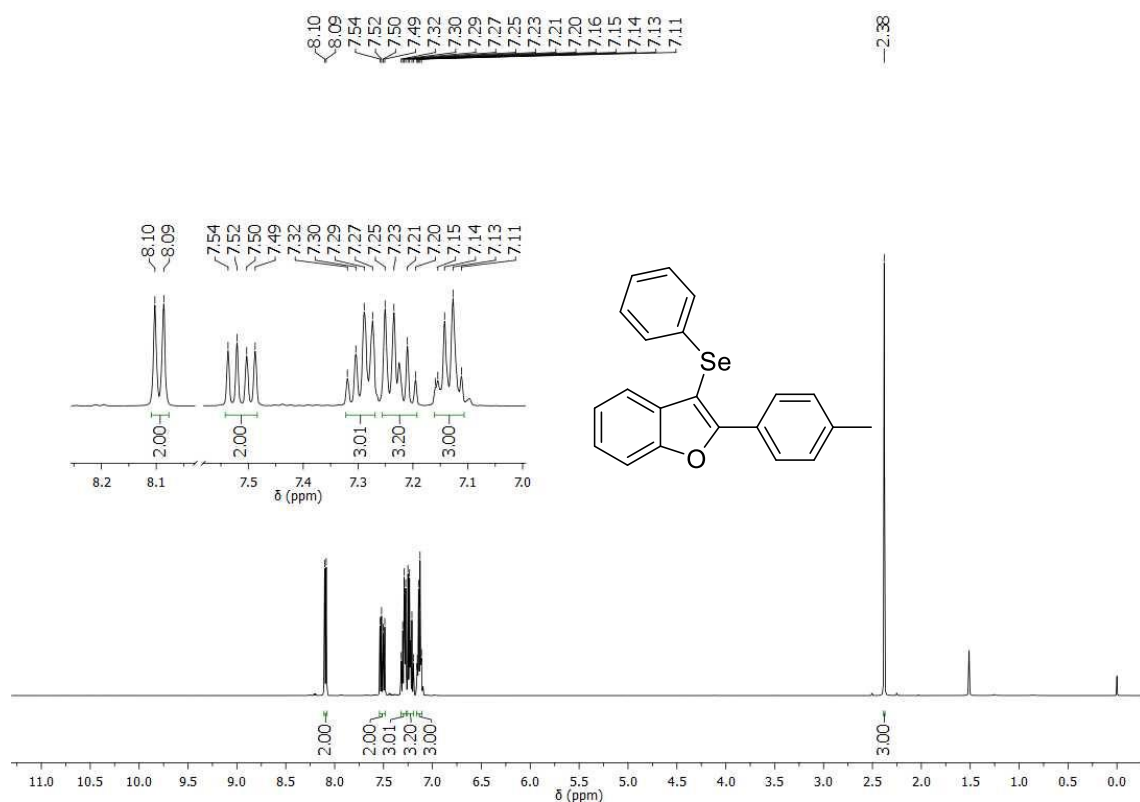

**Figure S31:** <sup>1</sup>H NMR spectrum (500 MHz, CDCl<sub>3</sub>) of compound **3q**

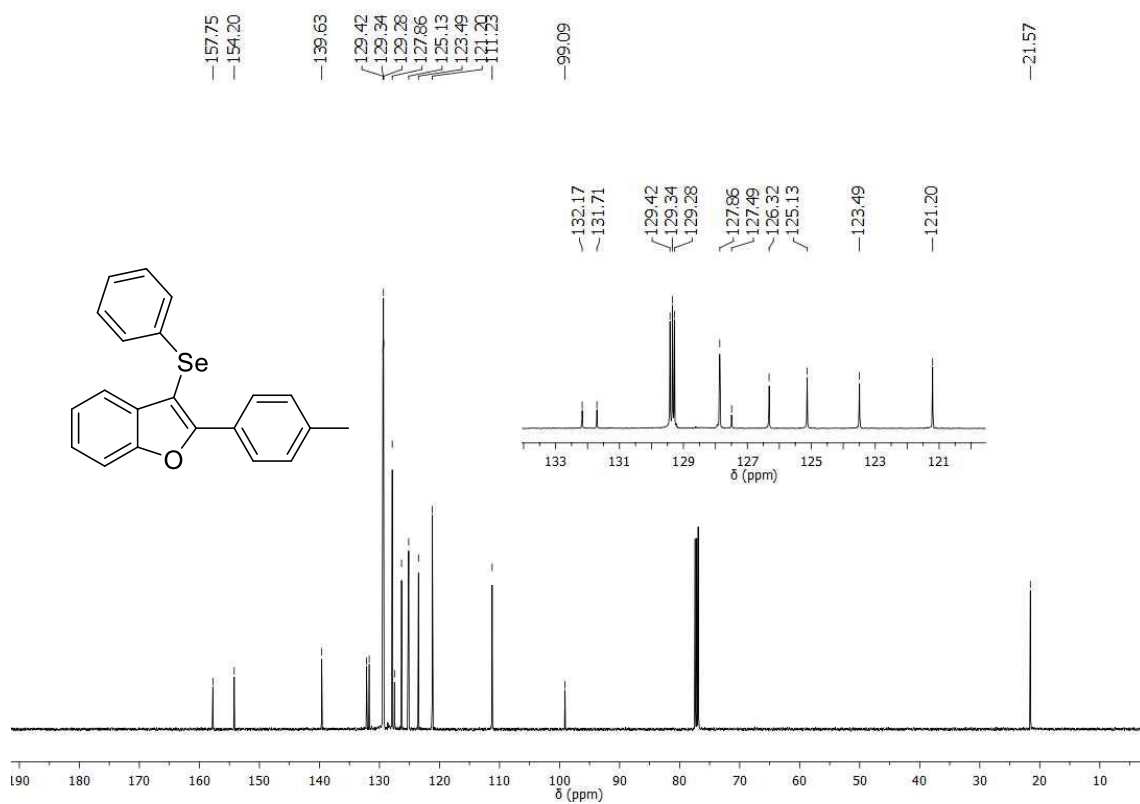

**Figure S32:** <sup>13</sup>C NMR spectrum (125 MHz, CDCl<sub>3</sub>) of compound **3q**

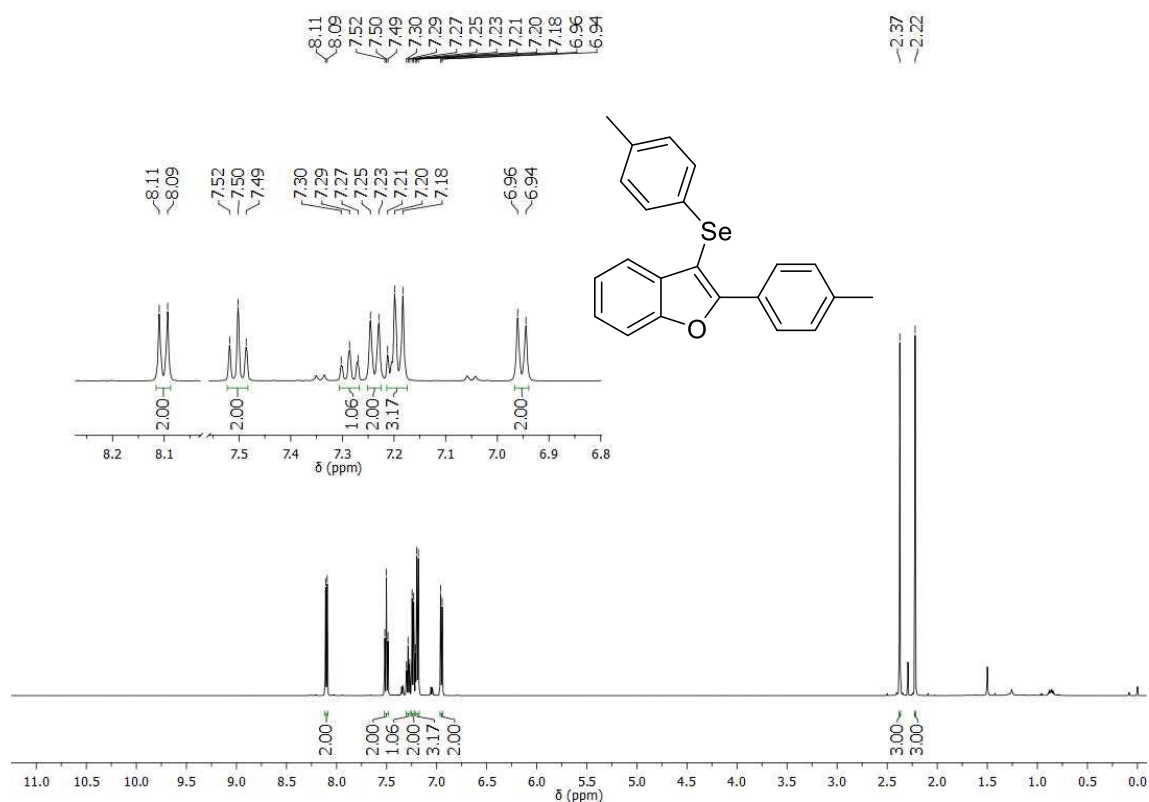

**Figure S33:** <sup>1</sup>H NMR spectrum (500 MHz, CDCl<sub>3</sub>) of compound **3r**

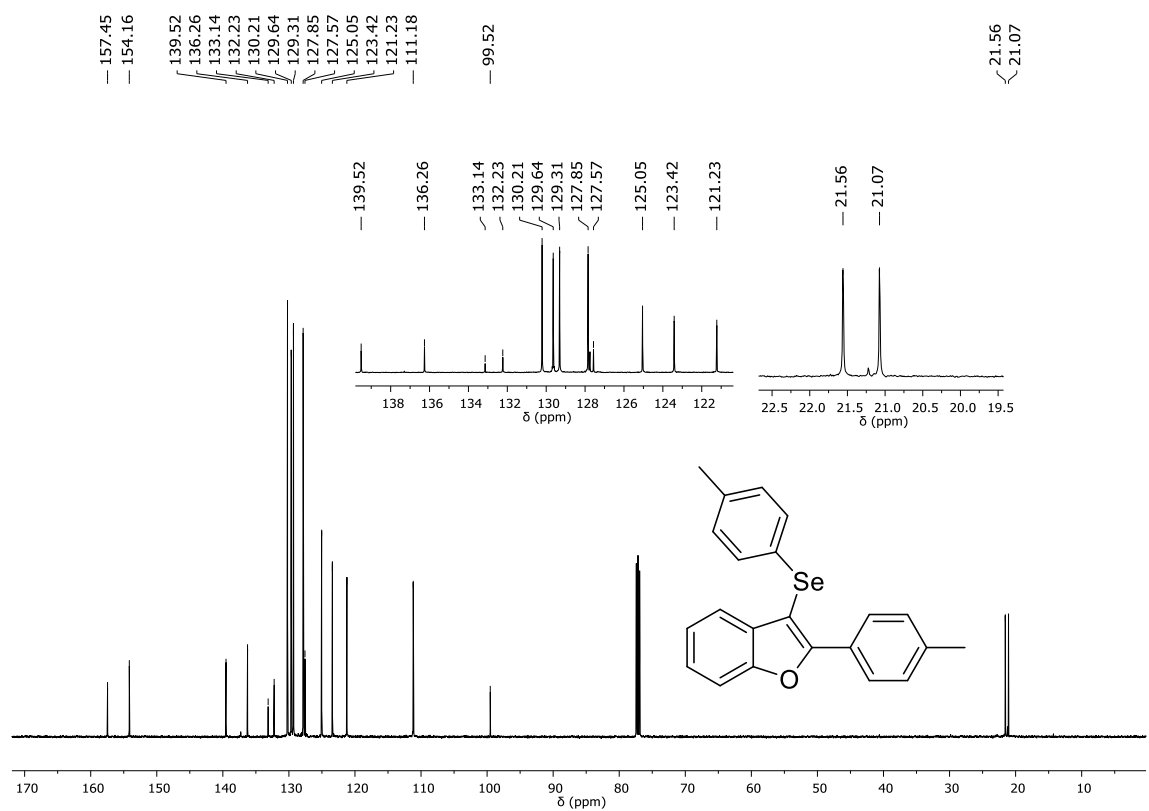

**Figure S34:** <sup>13</sup>C NMR spectrum (125 MHz, CDCl<sub>3</sub>) of compound **3r**



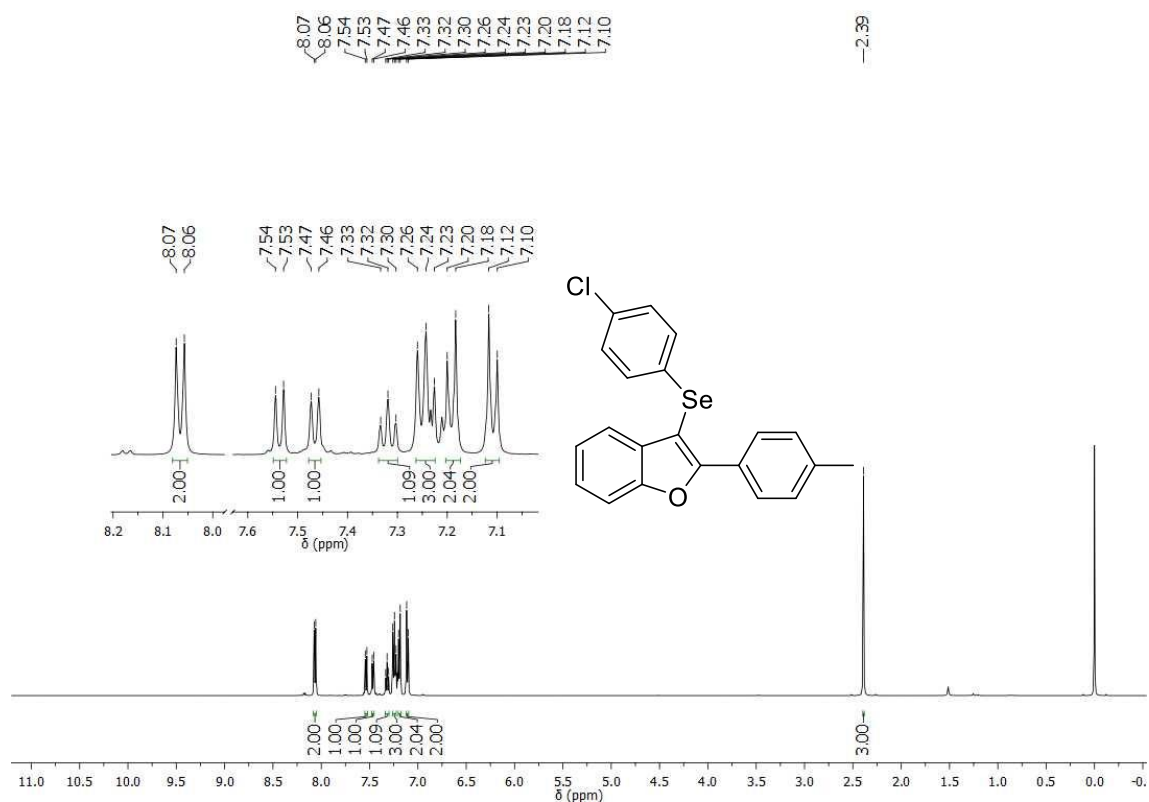

**Figure S35:** <sup>1</sup>H NMR spectrum (500 MHz, CDCl<sub>3</sub>) of compound **3s**

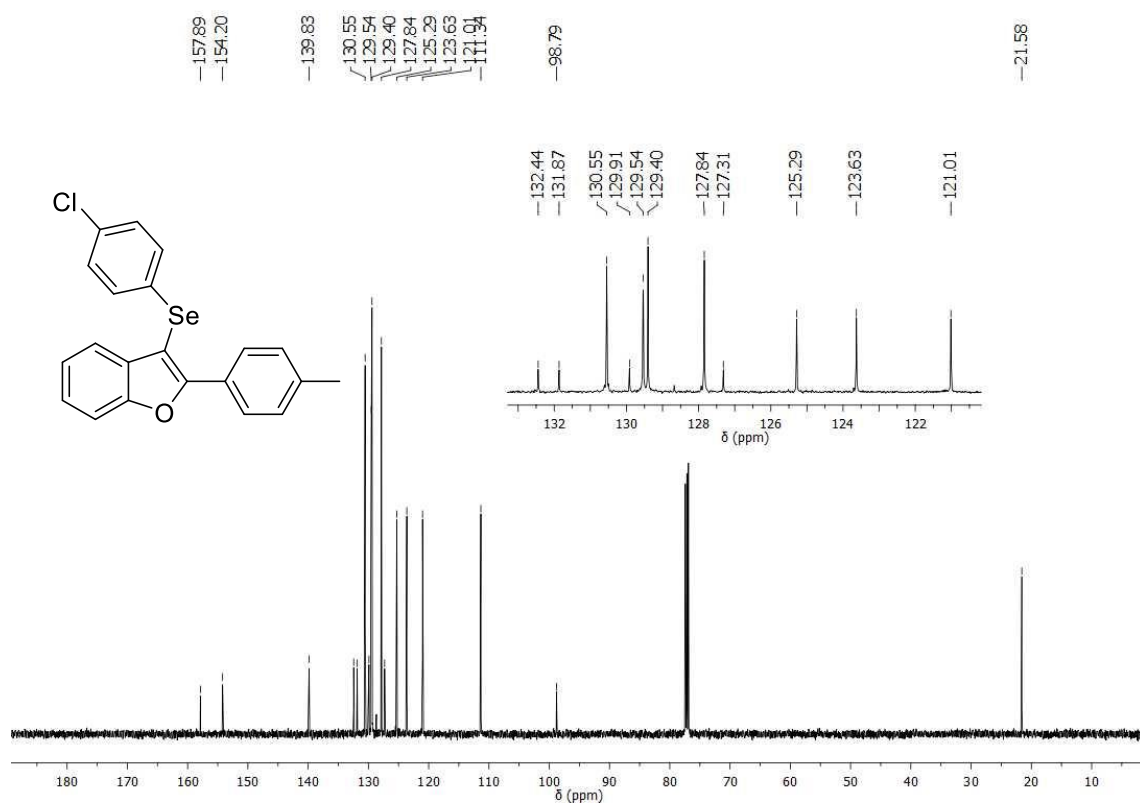

**Figure S36:** <sup>13</sup>C NMR spectrum (125 MHz, CDCl<sub>3</sub>) of compound **3s**

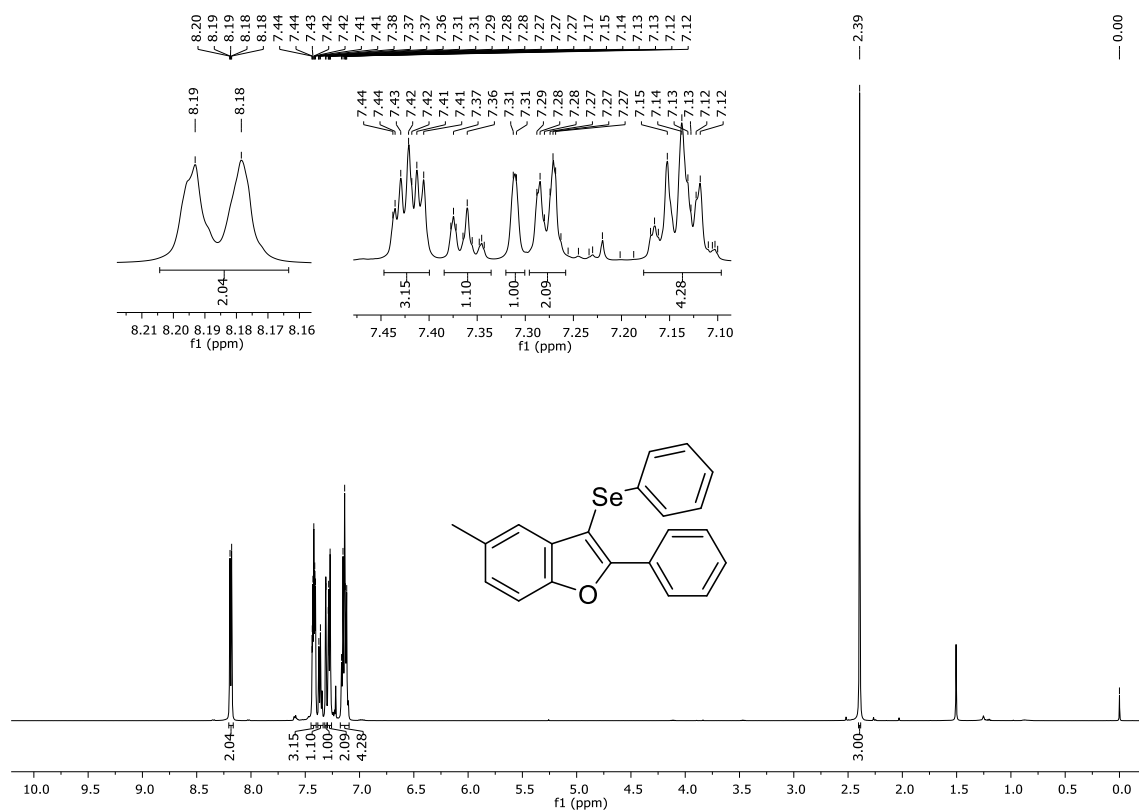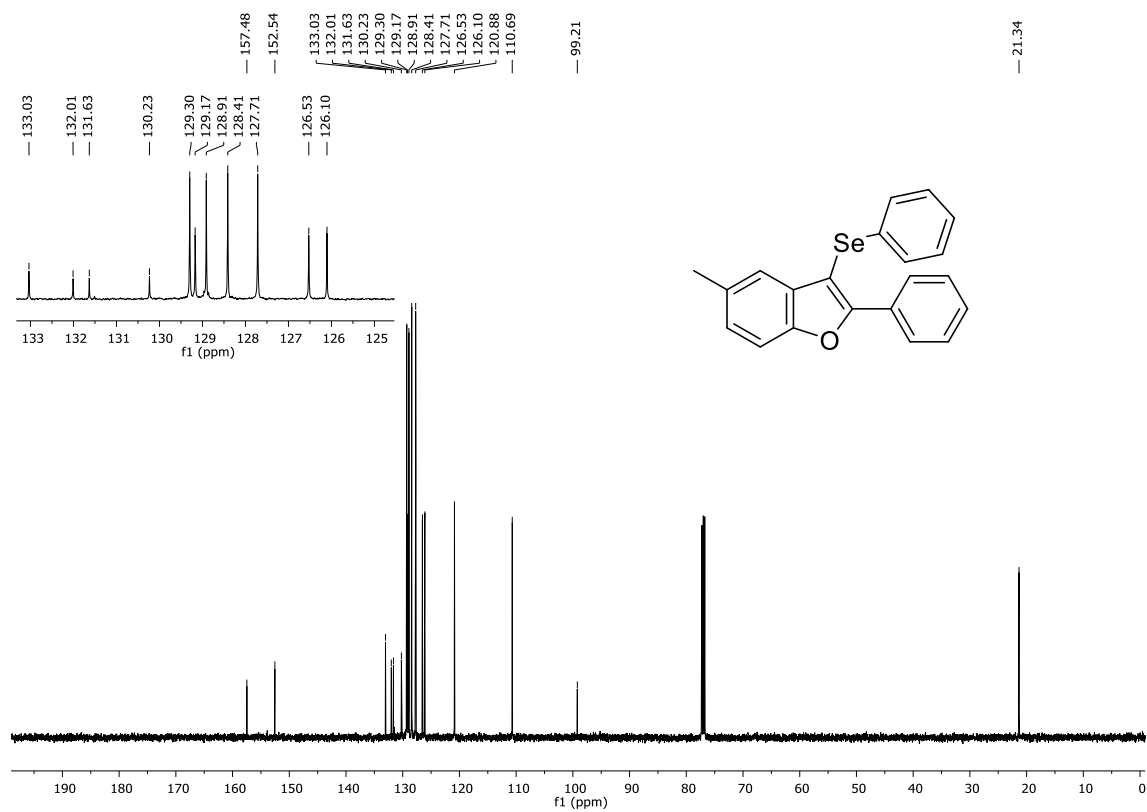

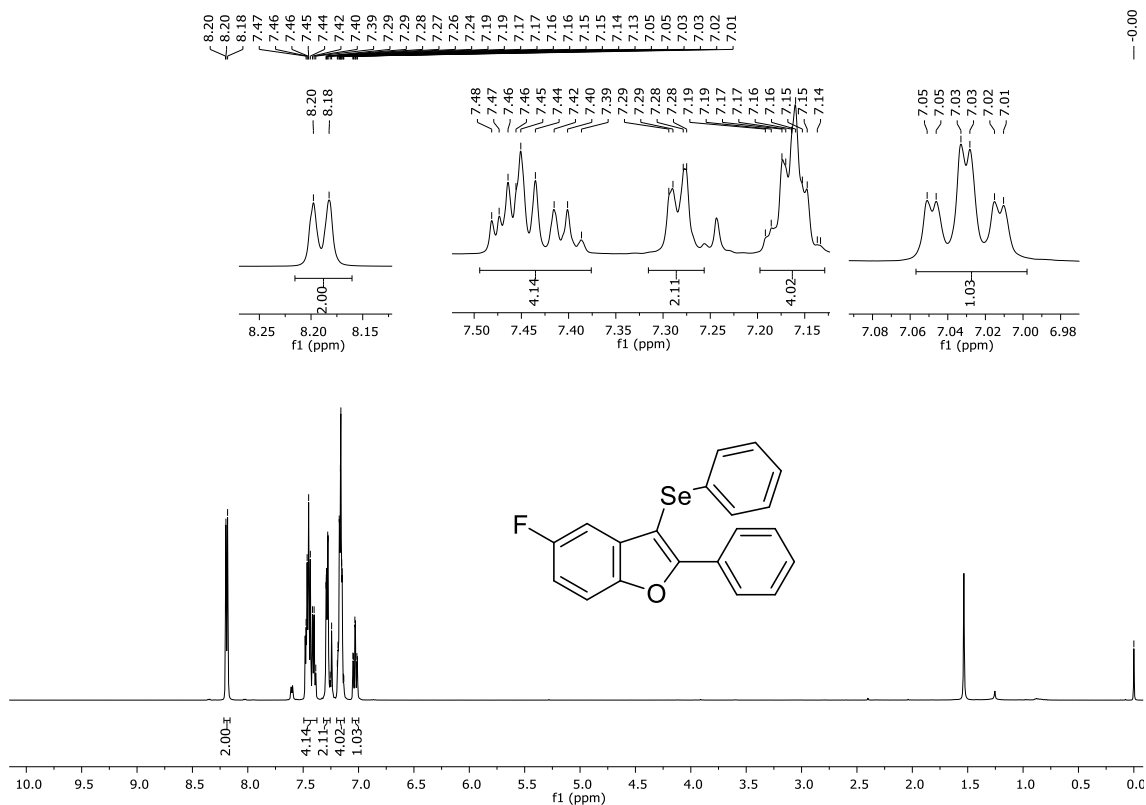

**Figure S39:** <sup>1</sup>H NMR spectrum (500 MHz, CDCl<sub>3</sub>) of compound **3u**

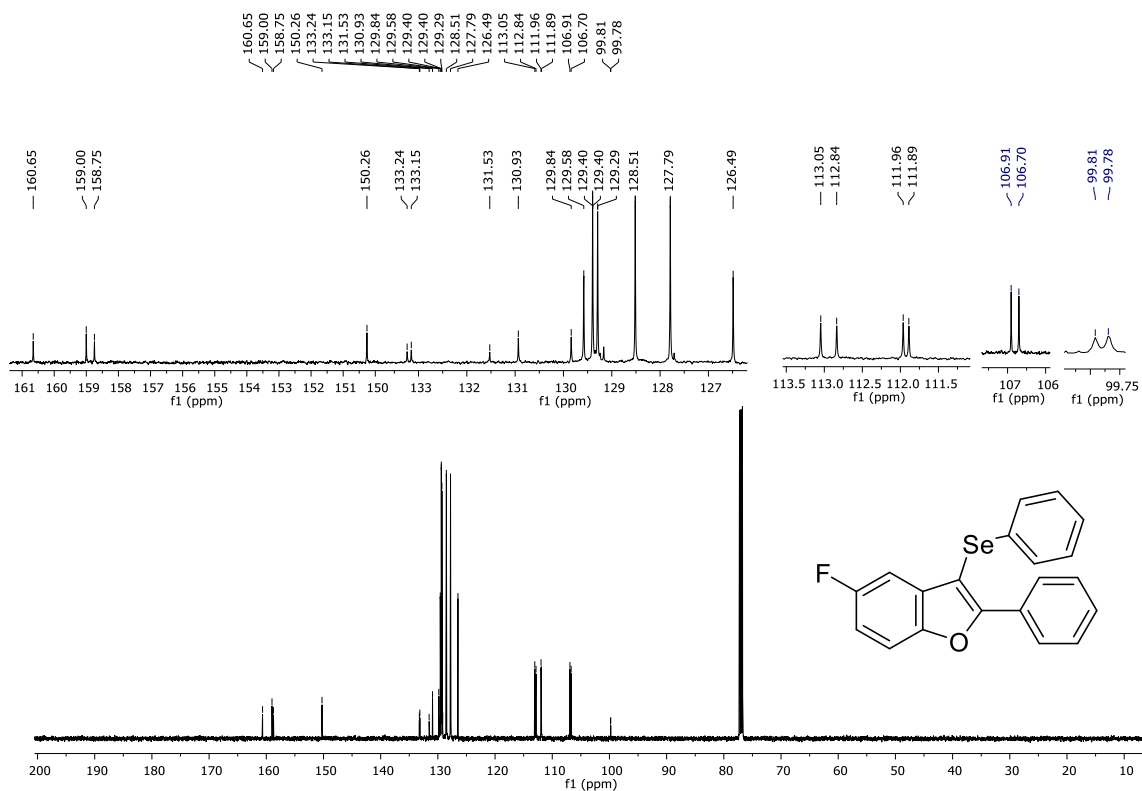

**Figure S40:** <sup>13</sup>C NMR spectrum (125 MHz, CDCl<sub>3</sub>) of compound **3u**



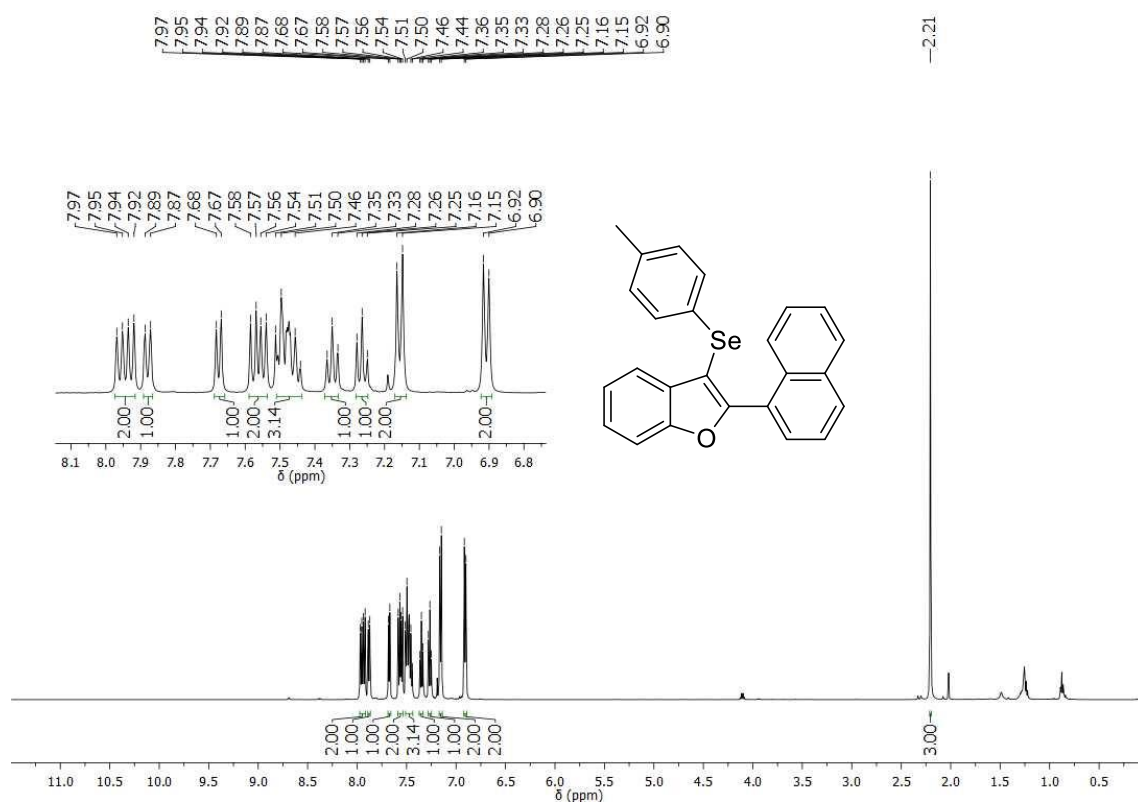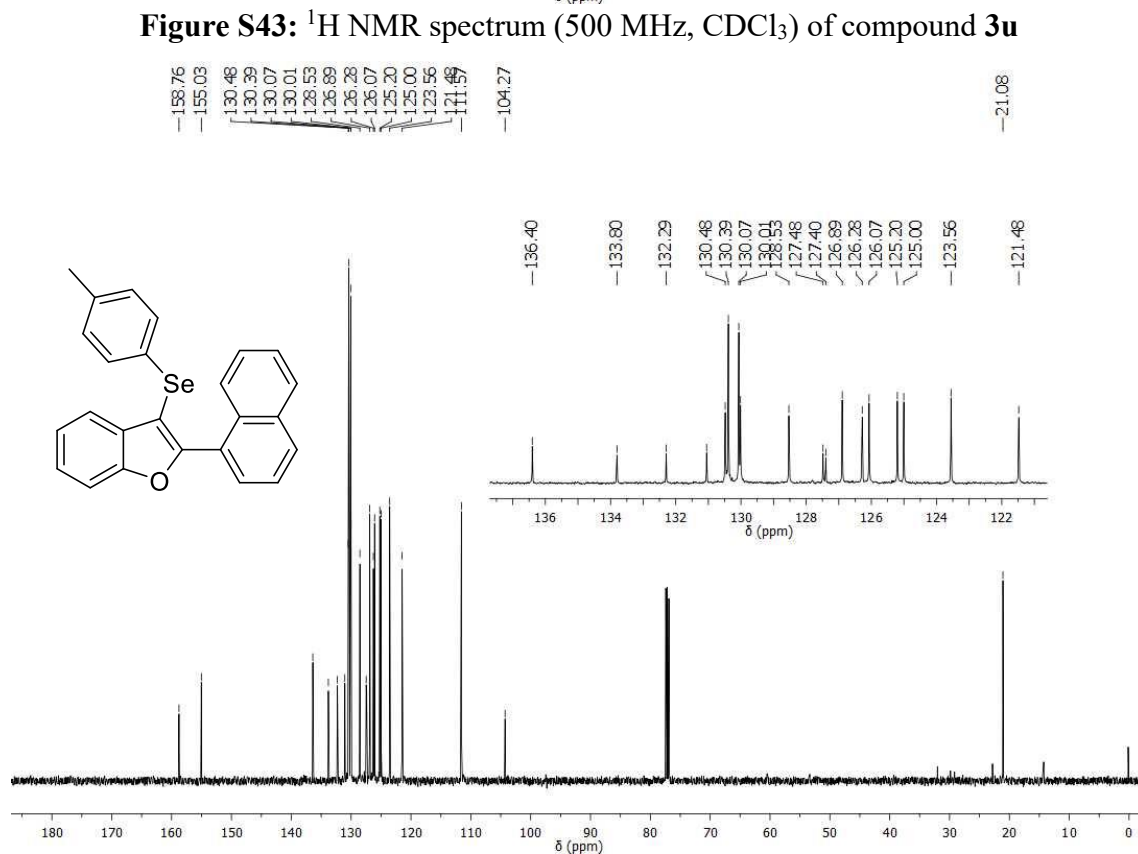

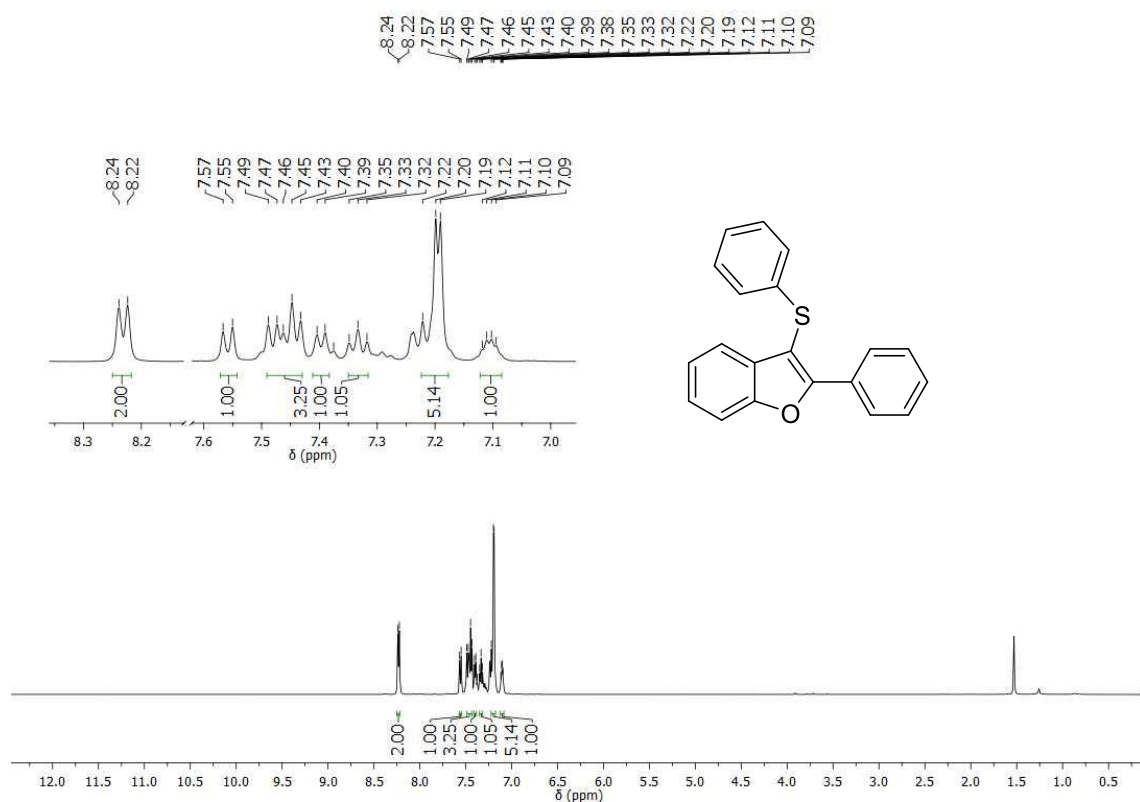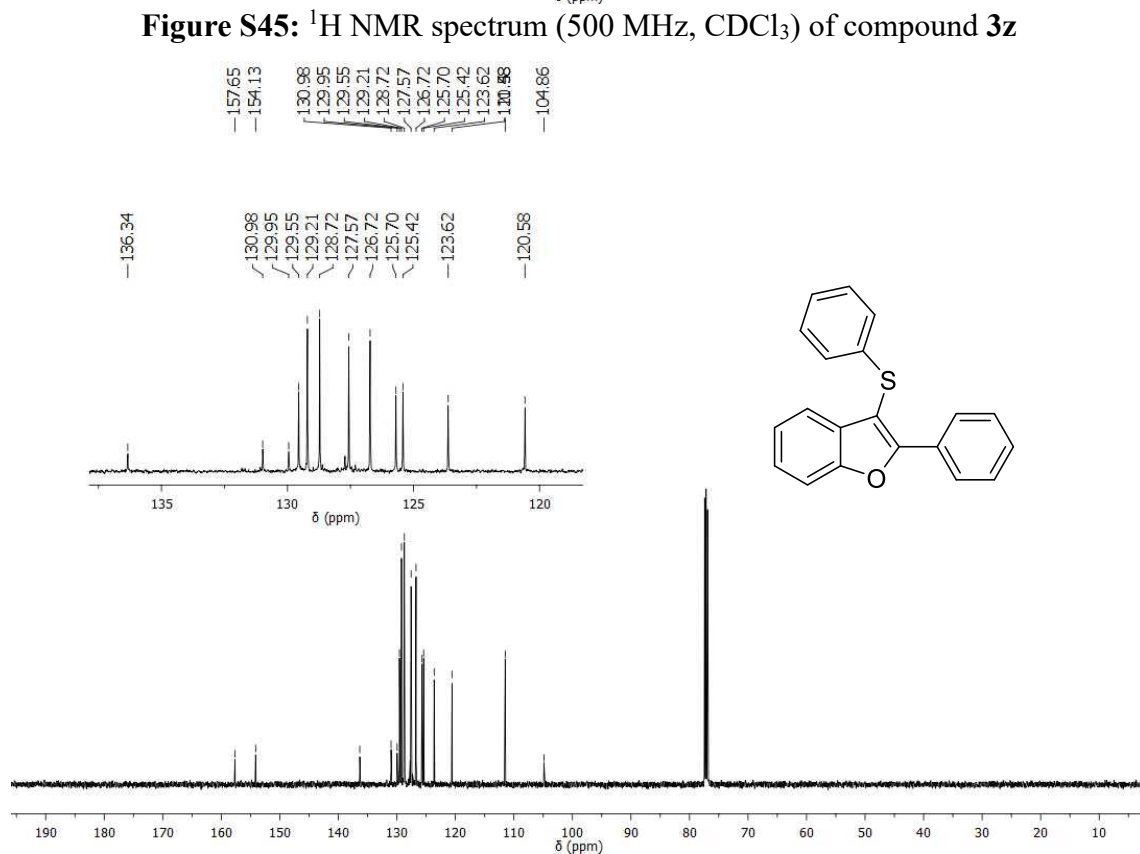

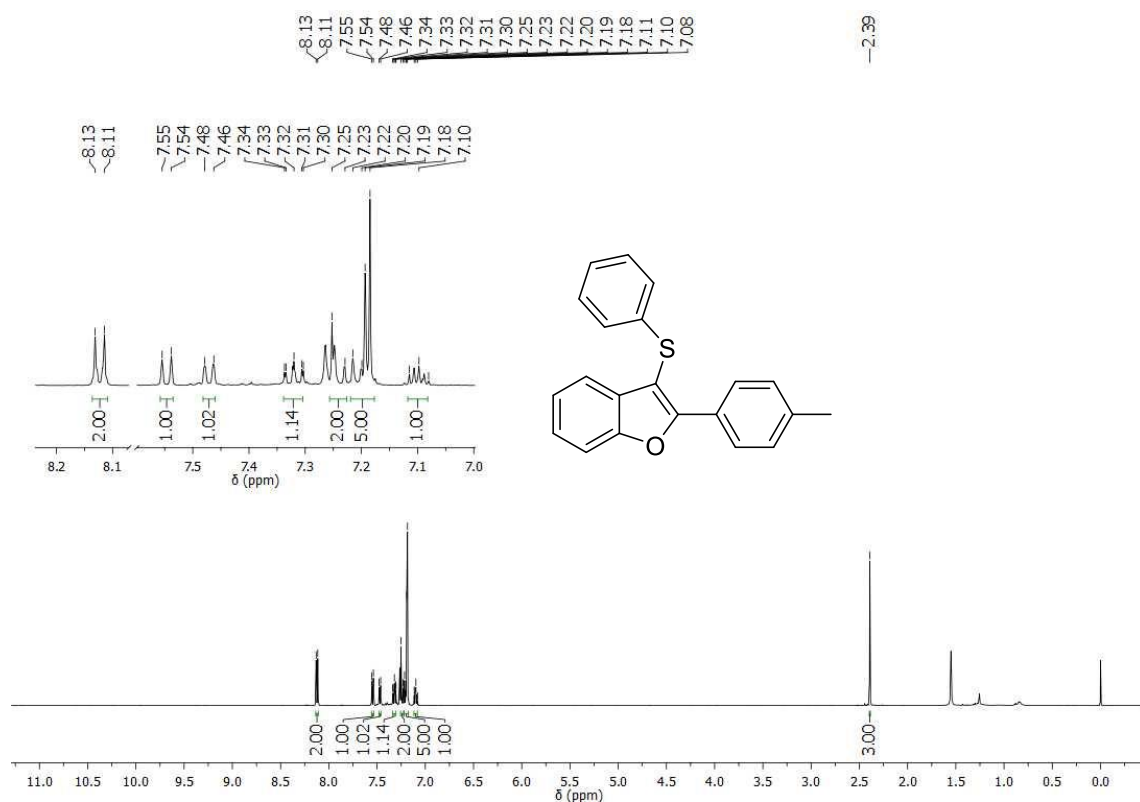

**Figure 47:** <sup>1</sup>H NMR spectrum (500 MHz, CDCl<sub>3</sub>) of compound **3aa**

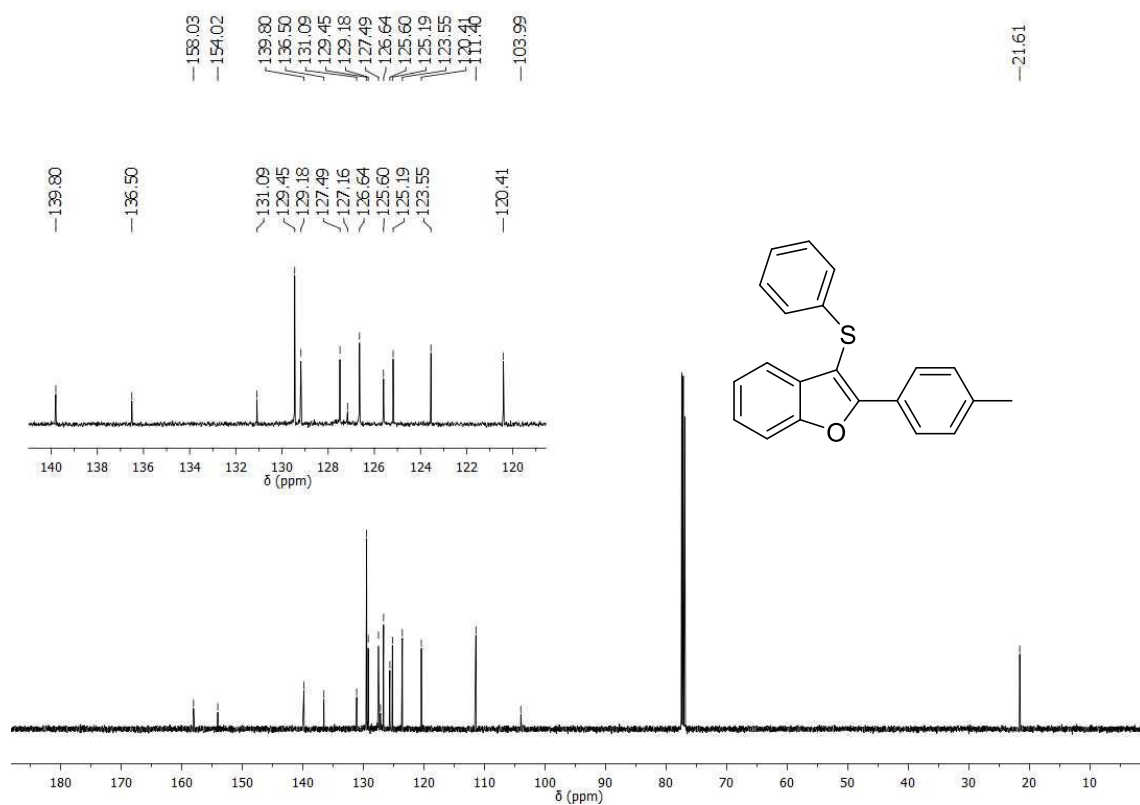

**Figure 48:** <sup>13</sup>C NMR spectrum (125 MHz, CDCl<sub>3</sub>) of compound **3aa**

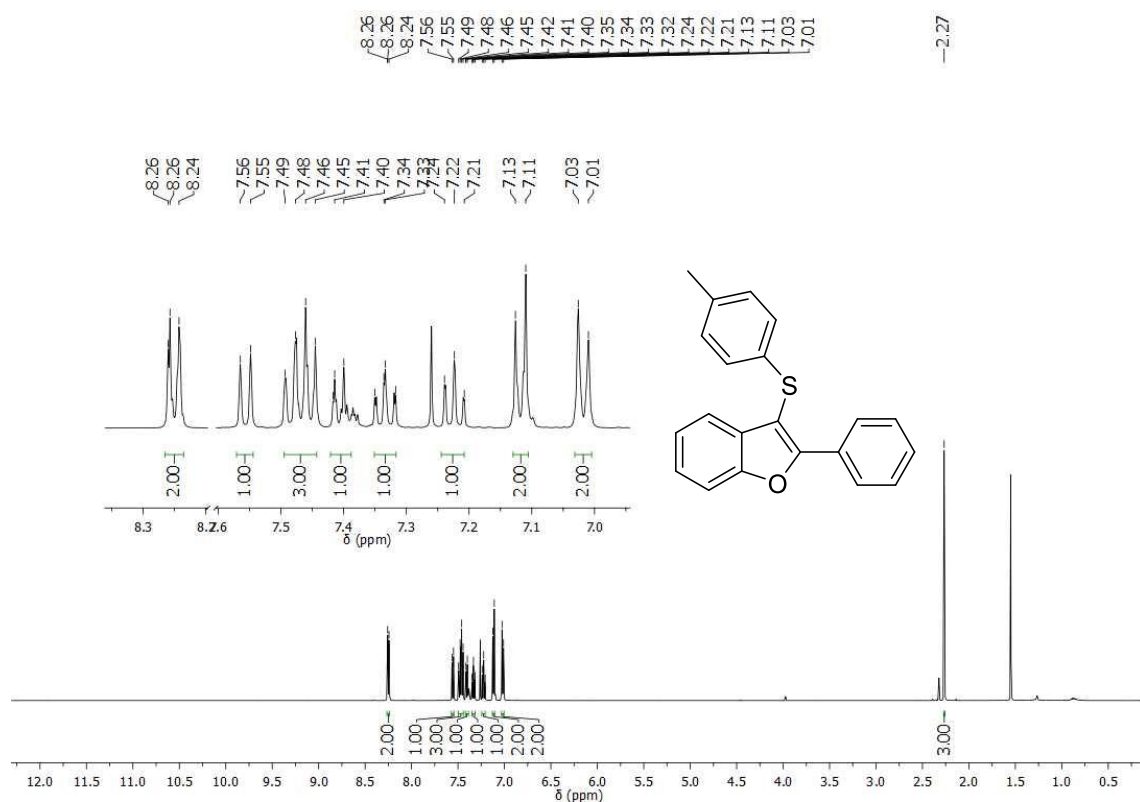

**Figure S49:** <sup>1</sup>H NMR spectrum (500 MHz, CDCl<sub>3</sub>) of compound **3ab**

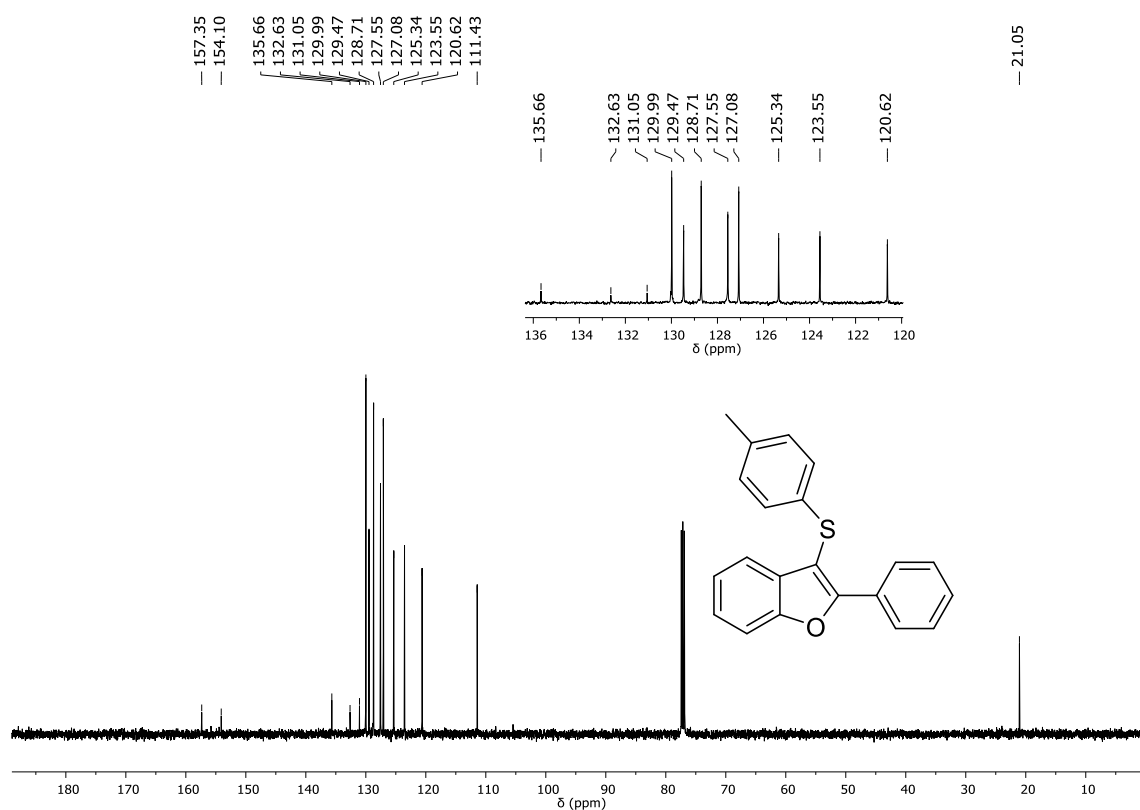

**Figure S50:** <sup>13</sup>C NMR spectrum (125 MHz, CDCl<sub>3</sub>) of compound **3ab**



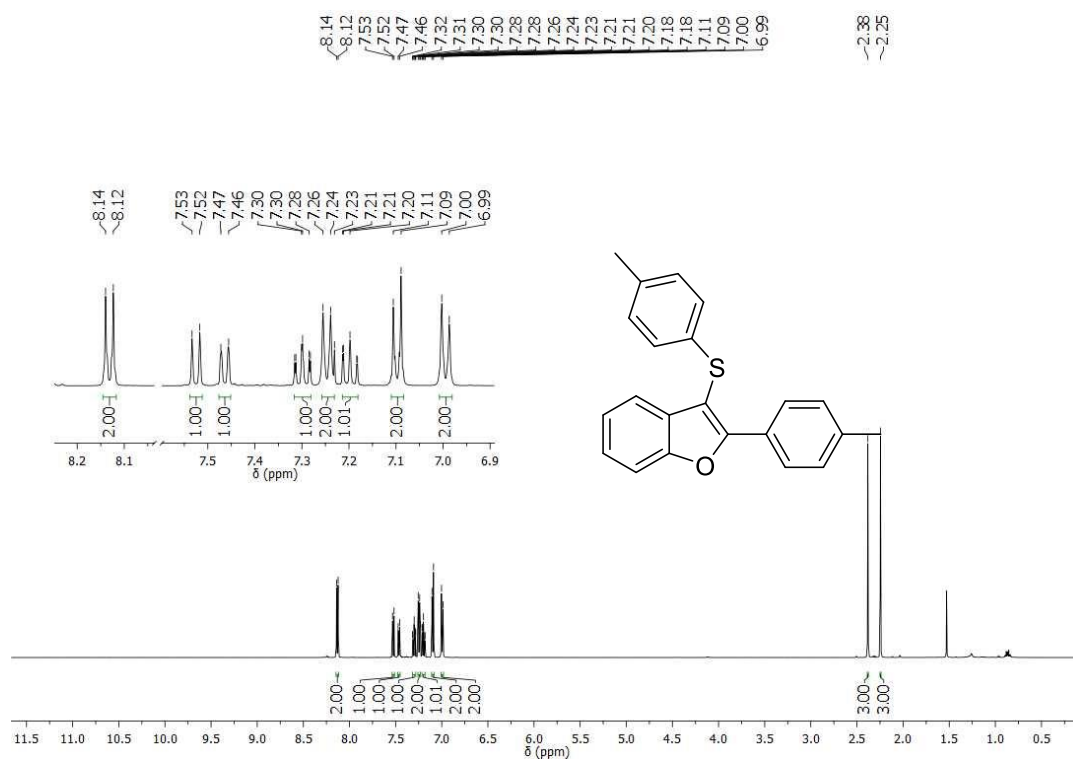

**Figure 51:** <sup>1</sup>H NMR spectrum (500 MHz, CDCl<sub>3</sub>) of compound **3ac**

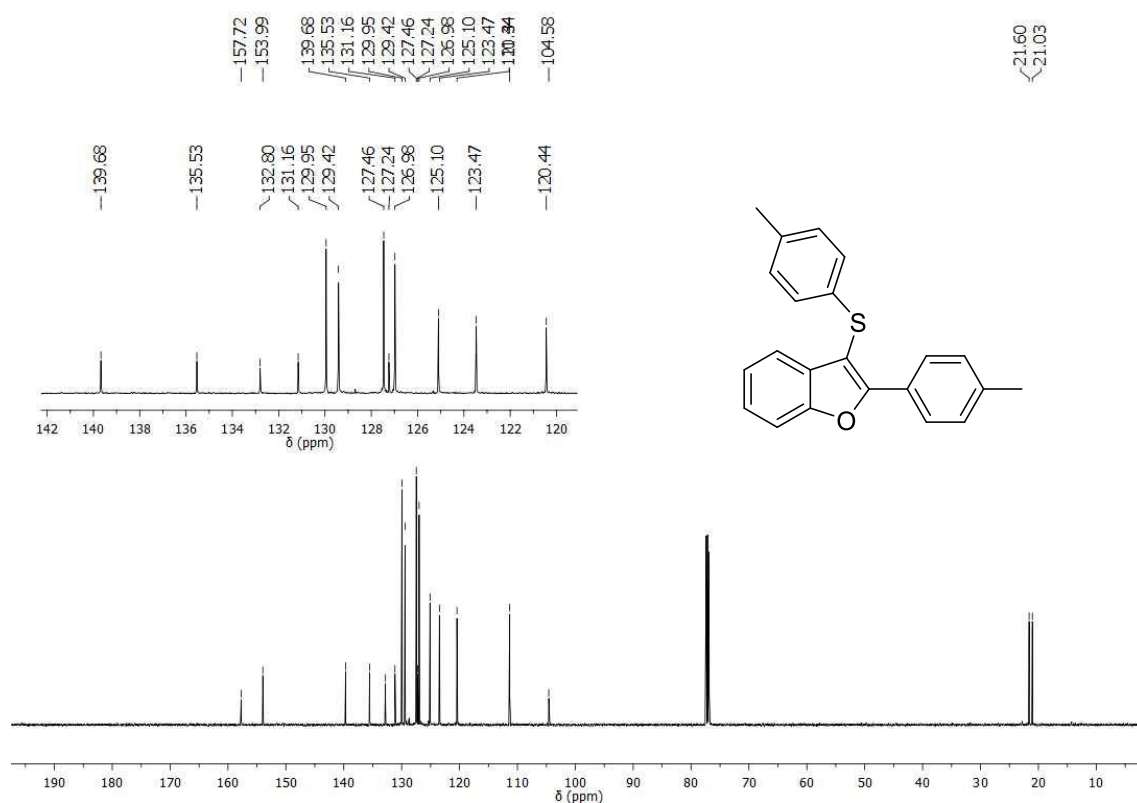

**Figure 52:** <sup>13</sup>C NMR spectrum (125 MHz, CDCl<sub>3</sub>) of compound **3ac**



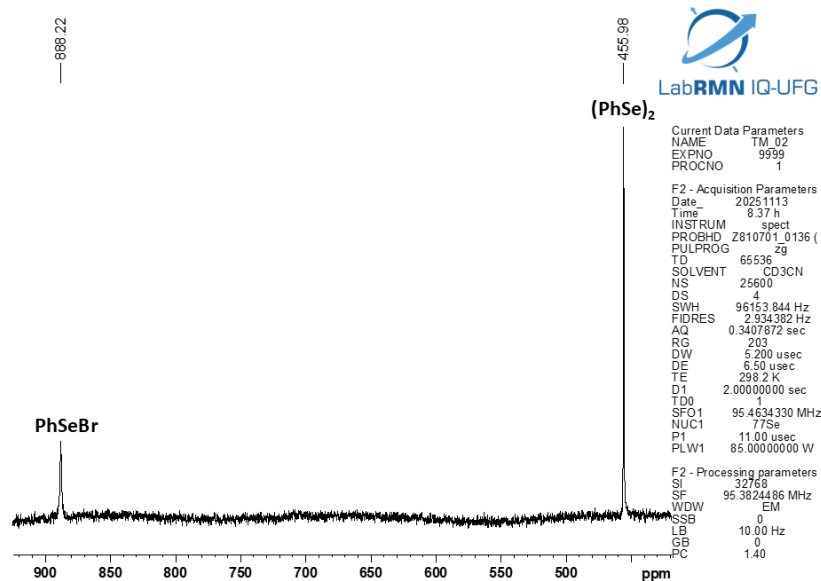

**Figure S55:**  $^{77}\text{Se}$  NMR spectrum (95 MHz,  $\text{CDCl}_3$ ) of mixture between **2a** and  $\text{CBr}_4$

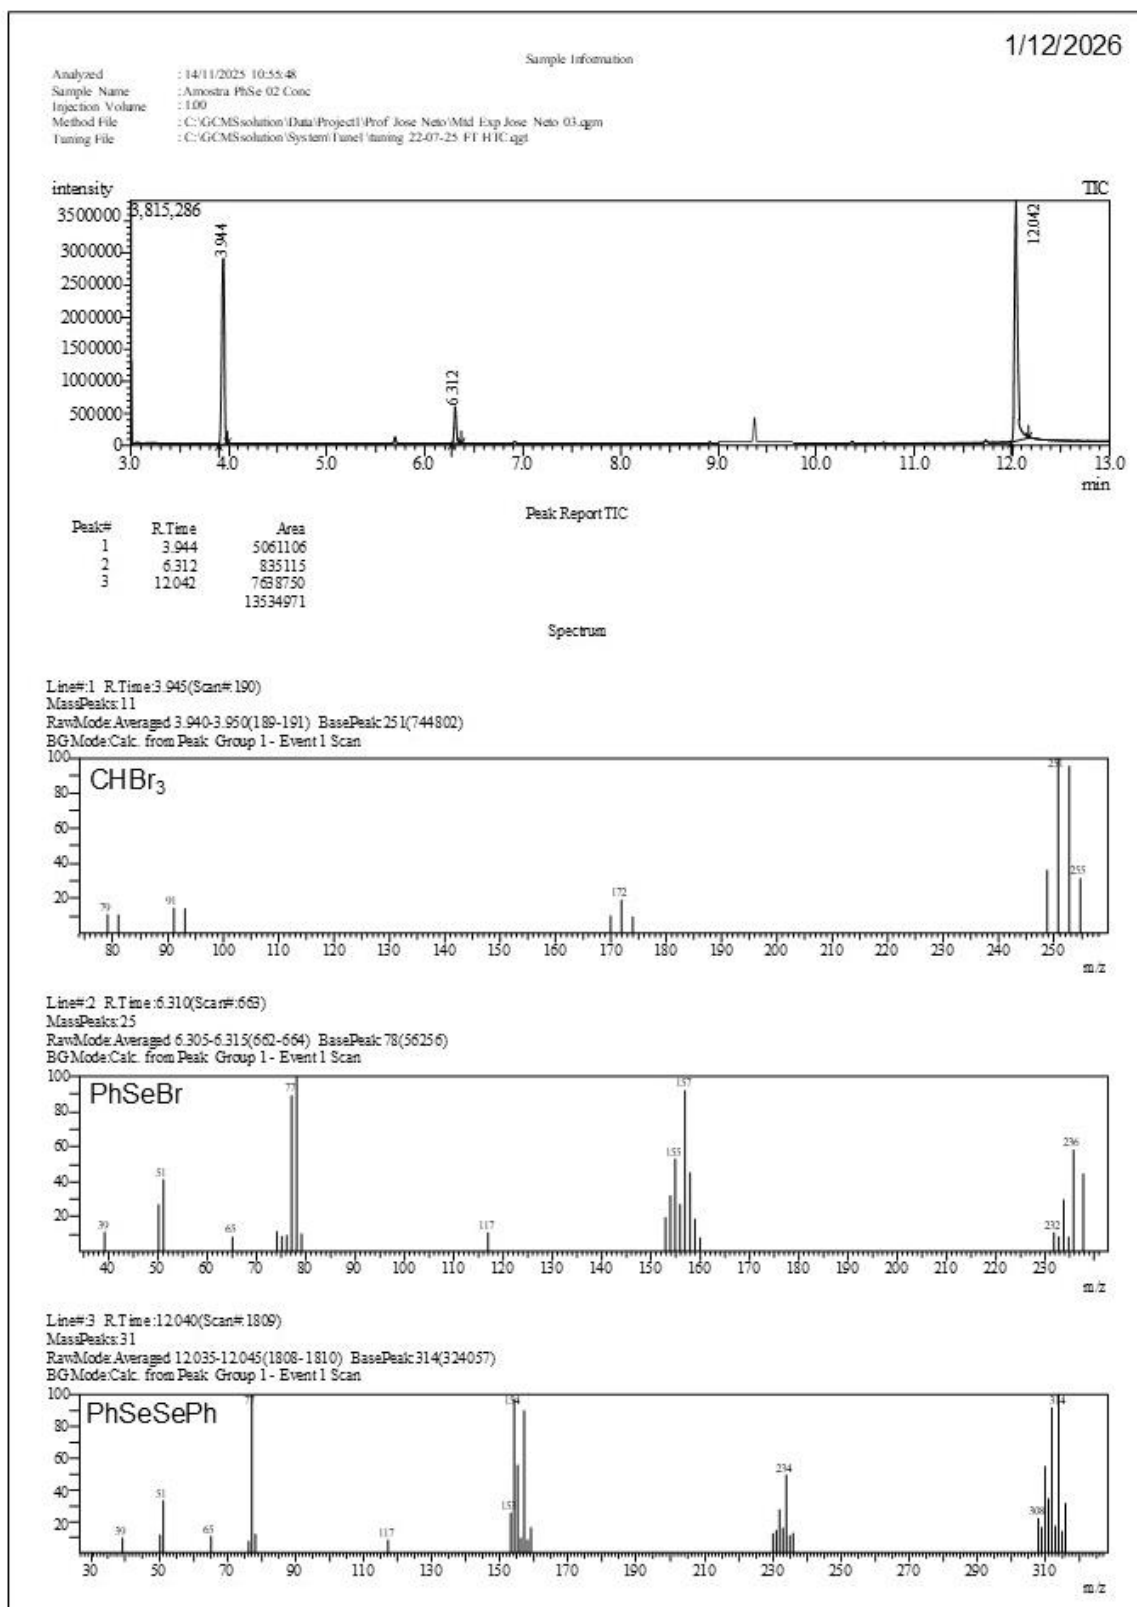

**Figure S56:** GCMS analysis of the reaction mixture between compound **2a** and CBr<sub>4</sub>.

## 8. Supplementary *in silico* data – Molecular docking and ADME/T

**8.1 The molecular docking method.** The 2D structures of the compounds were drawn using ChemDraw, converted to 3D, and optimized using Avogadro.<sup>12</sup> Subsequently, charges were assigned, polar hydrogen atoms were added, and rotatable bonds were defined using the AutoDock Tool (ADT), included in the MGLTools package (version 1.5.7).<sup>13</sup> Considering that xanthine oxidase and xanthine dehydrogenase (XDH) has a molybdenum-pterin centers structurally equivalent, the XDH-base structure was employed for the xanthine oxidase docking analyses<sup>14x</sup>. The 3D crystal structures of NADPH oxidase and XDH (equivalent to xanthine oxidase) were obtained from the Protein Data Bank (PDB) (PDB ID: 2CDU)<sup>15</sup> and (PDB ID: 1N5X).<sup>16</sup> After downloading, the structures were organized, and possible duplicate chains or residues were cleaned using PyMOL 3.0.0.<sup>17</sup> To ensure the complete removal of residues, Chimera 1.17.3 was employed.<sup>18</sup> Water molecules were removed, and polar hydrogens and charges were added using ADT, which was also used to define the grid box parameters for these structures. The grid box for NADPH oxidase was centered at 10.151, 0.699, and 6.106 Å (for x, y, and z) with dimensions of 30 × 30 × 30 points. For xanthine oxidase, the grid box was centered at 115.63, 49.857, and 23.254 Å (for x, y, and z), also with dimensions of 30 × 30 × 30 points. Docking was performed using AutoDock Vina 1.1.1,<sup>16</sup> and the docking scores were reported as binding affinities (kcal/mol). The interactions between the ligands and proteins were analyzed using Discovery Studio version 24.1.0.23298.<sup>19</sup>

**8.2 ADME/T prediction method.** The SMILES codes of the structures were used, obtained through the JSME Test Page software (<https://jsme->

---

<sup>12</sup> M. D. Hanwell, D. E. Curtis, D. C. Lonie, T. Vandermeersch, E. Zurek, G. R. Hutchison, J. Cheminform. 2012, 4, 17.

<sup>13</sup> G. M. Morris, R. Huey, W. Lindstrom, M. F. Sanner, R. K. Belew, D. S. Goodsell, A. J. Olson, J. Comput. Chem. 2009, 30, 2785-2791.

<sup>14</sup> Gao J, Zhang Z, Zhang B, Mao Q, Dai X, Zou Q, Lei Y, Feng Y, Wang S. Bioorg Chem. 2020, 95, 103564.

<sup>15</sup> A. Farouk, M. Mohsen, H. Ali, H. Shaaban, N. Albaridi, Molecules 2021, 26, 4145.

<sup>16</sup> X. J. Wang, Z. J. Lin, B. Zhang, C. S. Zhu, H. J. Niu, Y. Zhou, A. Z. Nie, Y. Wang, Zhongguo Zhong Yao Za Zhi 2015, 40, 3818–3825.

<sup>17</sup> The PyMOL Molecular Graphics System, Version 1.2r3pre, Schrödinger, LLC.

<sup>18</sup> E. F. Pettersen, T. D. Goddard, C. C. Huang, G. S. Couch, D. M. Greenblatt, E. C. Meng, T. E. Ferrin, J. Comput. Chem. 2004, 25, 1605-1612.

<sup>19</sup> Dassault Systèmes BIOVIA, 2024. BIOVIA Discovery Studio, 24.1.0.23298, San Diego: Dassault Systèmes, 2024.

editor.github.io/dist/JSME\_test.html). The predictions were performed on the pkCSM website,<sup>20</sup> evaluating aspects related to Absorption, Distribution, Metabolism, Excretion, and Toxicity (ADME/T) for each compound. Among the parameters generated by the program, the most relevant for the research were selected: for the pharmacokinetic property of absorption, Caco-2 permeability and human intestinal absorption were highlighted; for distribution, blood-brain barrier permeability and central nervous system permeability were analyzed. For metabolism, interactions with cytochrome P450 isoforms were evaluated, considering both the potential of the compounds to act as substrates and inhibitors. For the excretion property, total clearance was selected, while for the toxicity parameter, AMES toxicity and hepatotoxicity were considered.

### 8.3 Molecular docking results

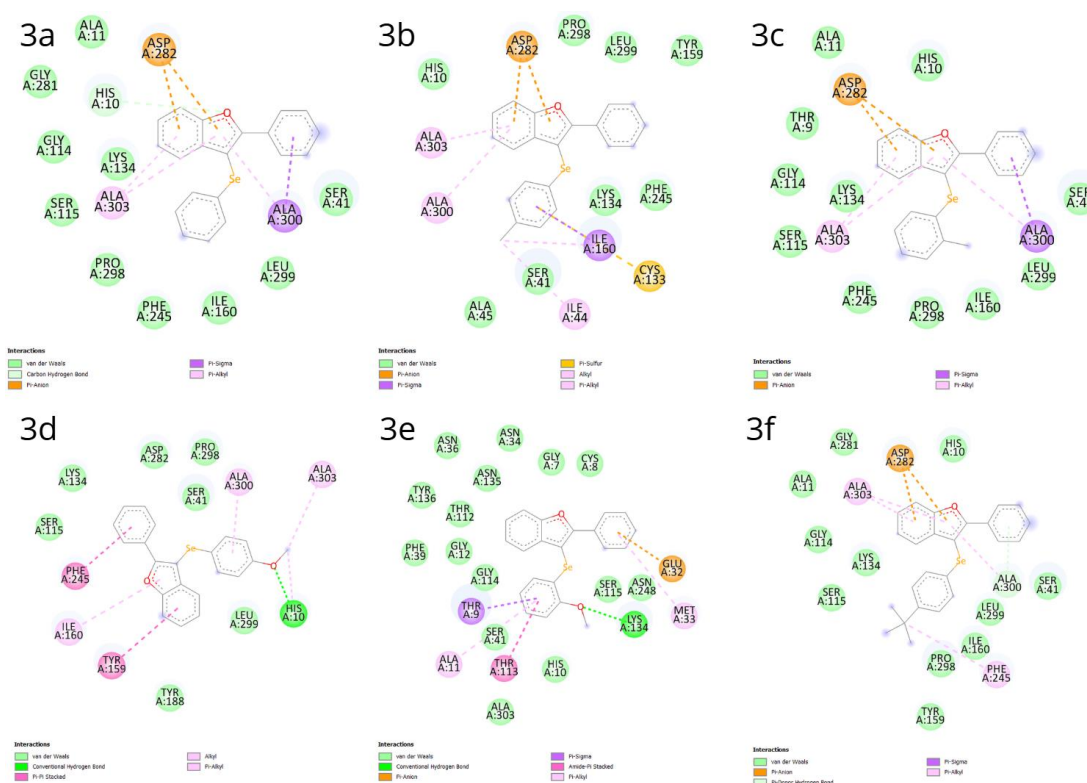

<sup>20</sup> D. E. Pires, T. L. Blundell, D. B. Ascher, J. Med. Chem. 2015, 58, 4066-4072.

**Figure S57.** 2D interaction diagrams of compounds **3a**, **3b**, **3c**, **3d**, **3e** and **3f** bound to NADPH oxidase active site.

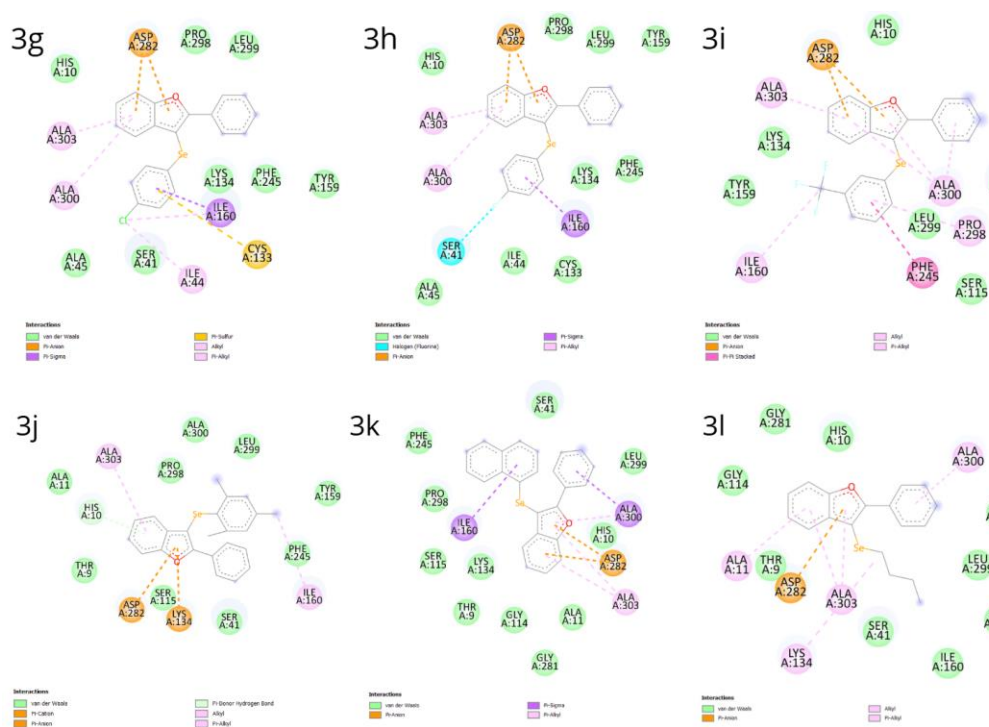

**Figure S58.** 2D interaction diagrams of compounds **3g**, **3h**, **3i**, **3j**, **3k**, and **3l** bound to NADPH oxidase active site.

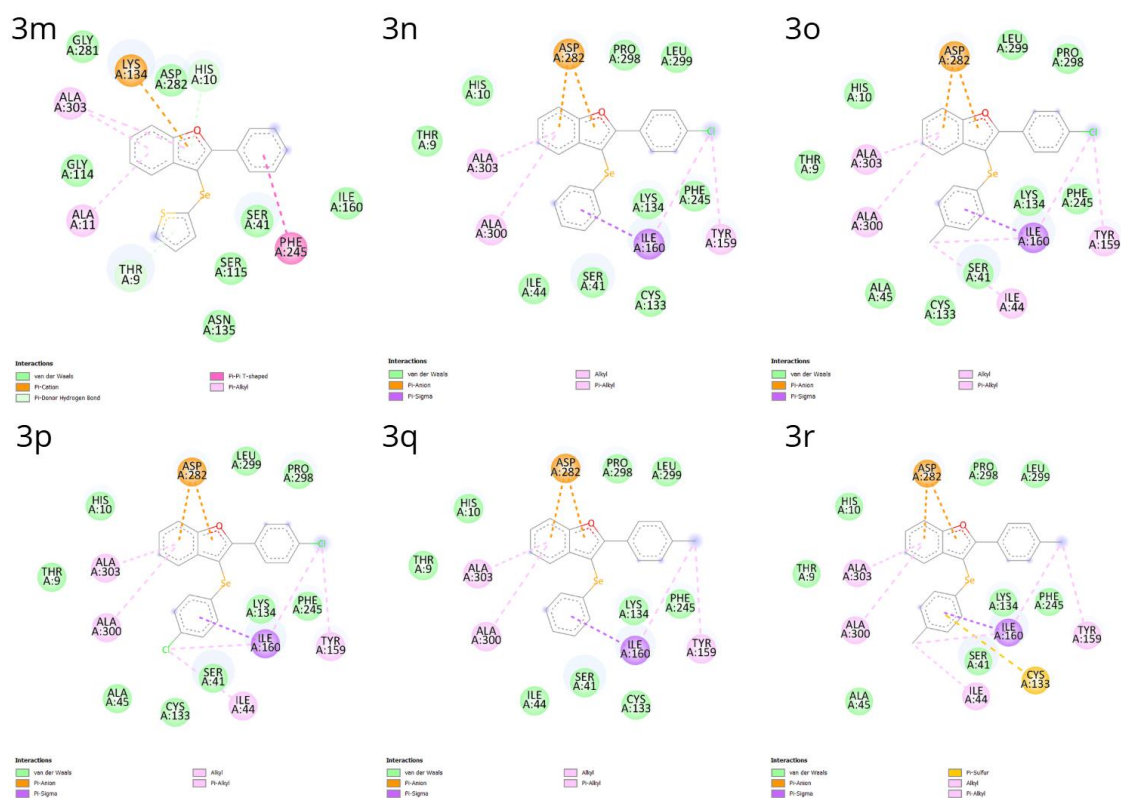

**Figure S59.** 2D interaction diagrams of compounds **3m**, **3n**, **3o**, **3p**, **3q** and **3r** bound to NADPH oxidase active site.

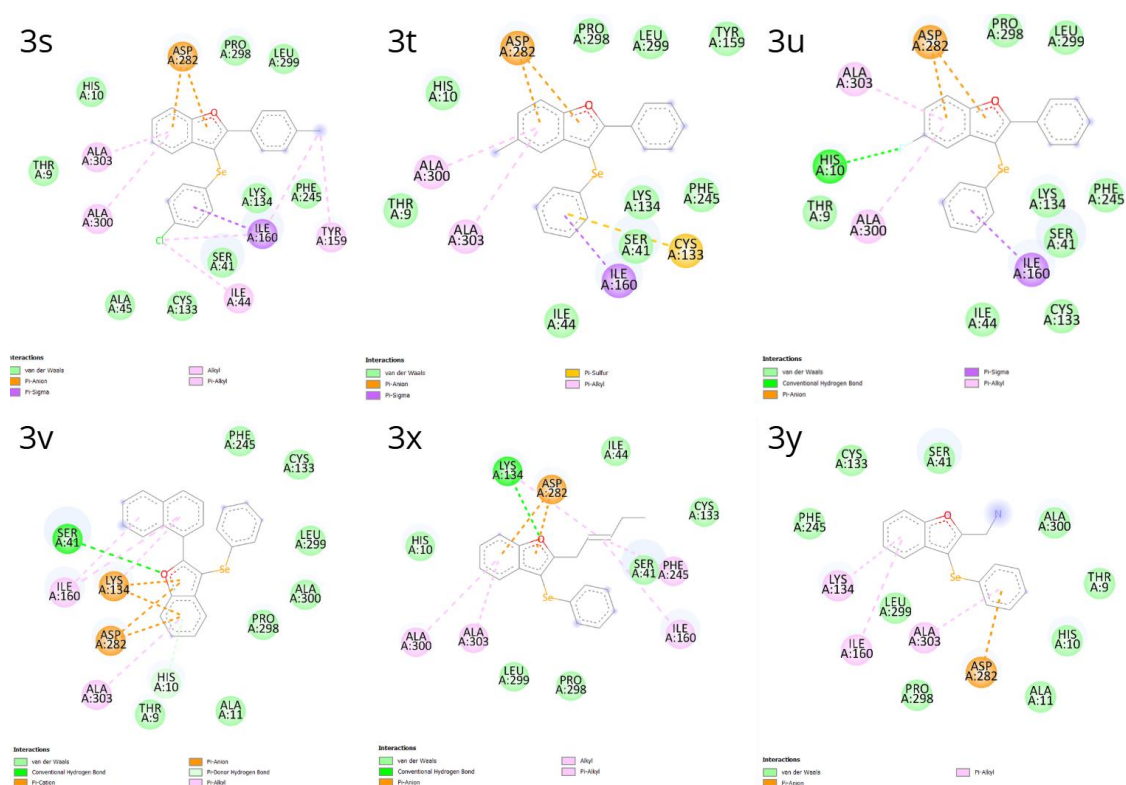

**Figure S60.** 2D interaction diagrams of compounds **3s**, **3t**, **3u**, **3v**, **3x** and **3y** bound to NADPH oxidase active site.



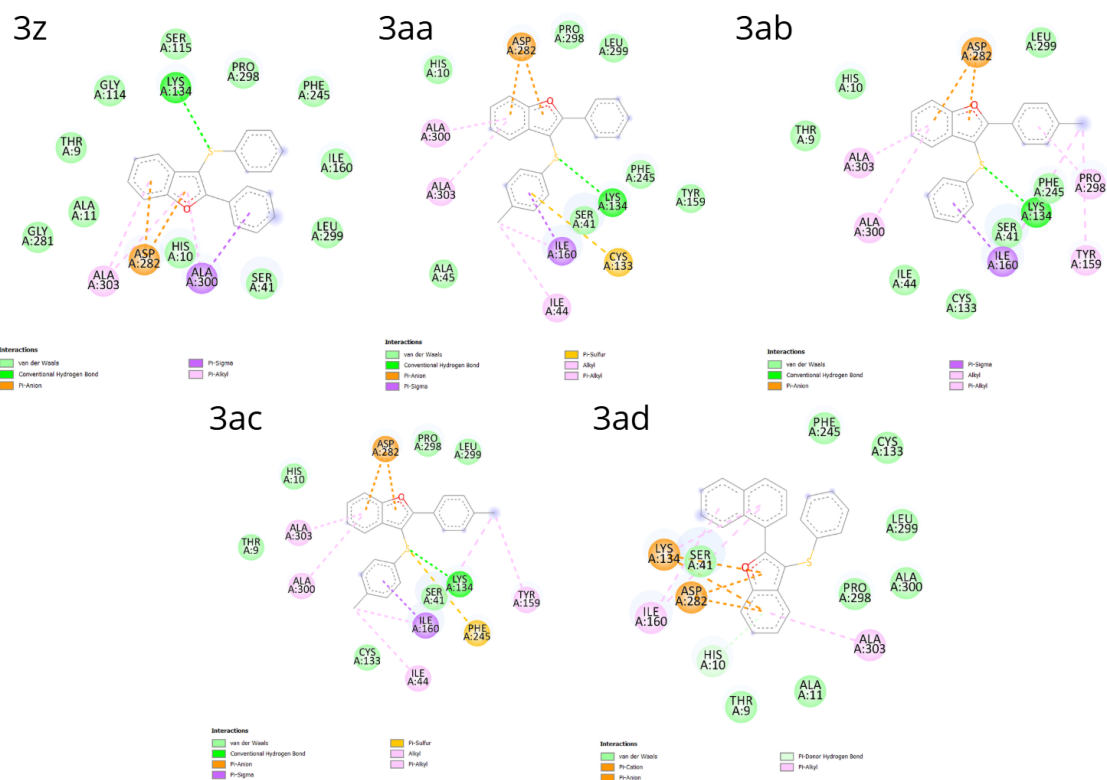

**Figure S61.** 2D interaction diagrams of compounds **3z**, **3aa**, **3ab**, **3ac** and **3ad** bound to NADPH oxidase active site.

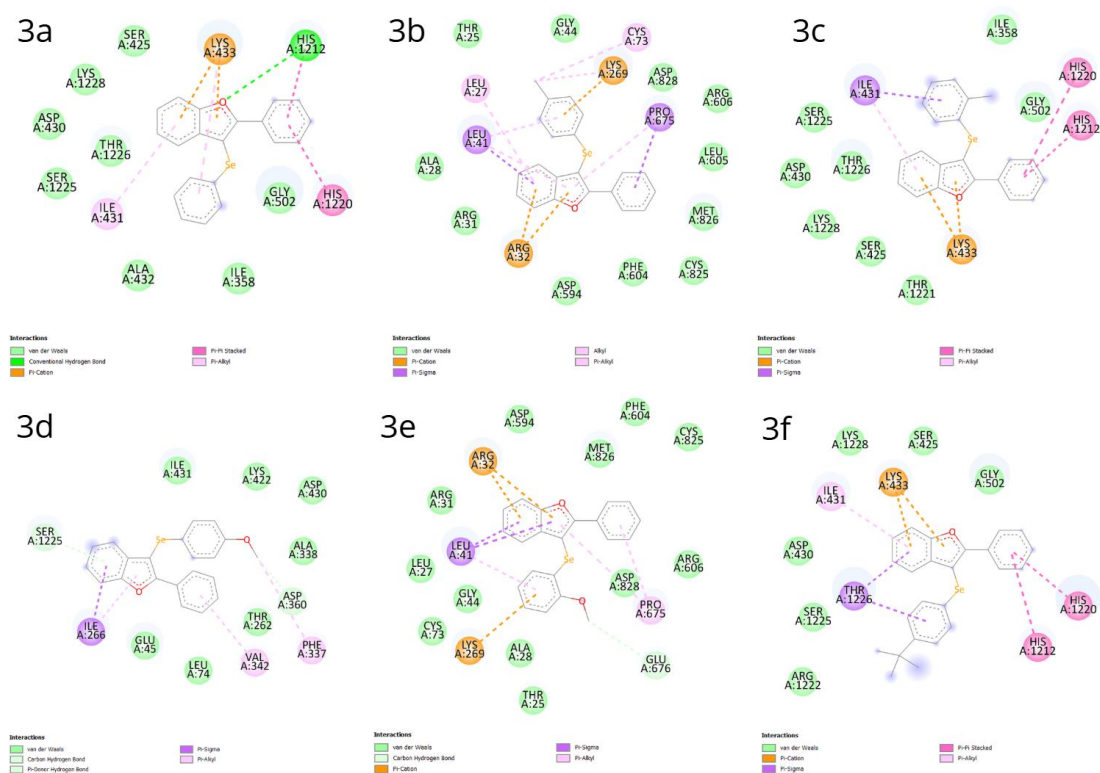

**Figure S62.** 2D interaction diagrams of compounds **3a**, **3b**, **3c**, **3d**, **3e** and **3f** bound to xanthine oxidase active site.



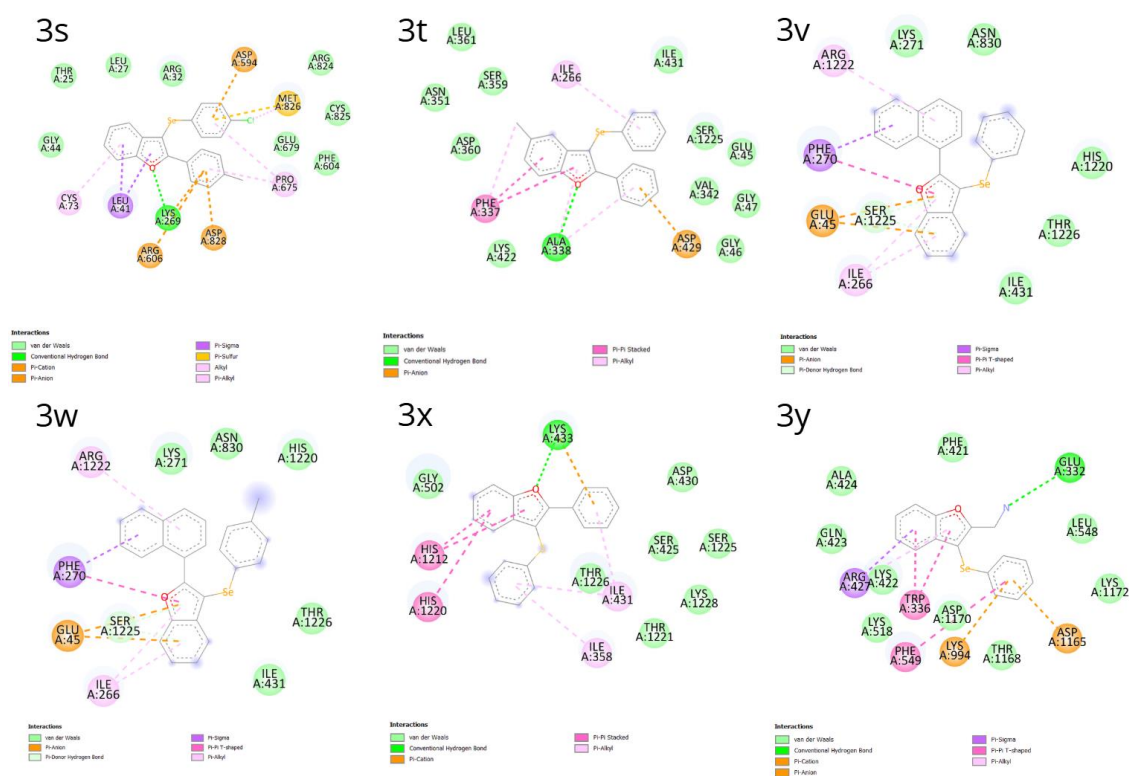

**Figure S65.** 2D interaction diagrams of compounds **3s**, **3t**, **3v**, **3w**, **3x** and **3y** bound to xanthine oxidase active site.

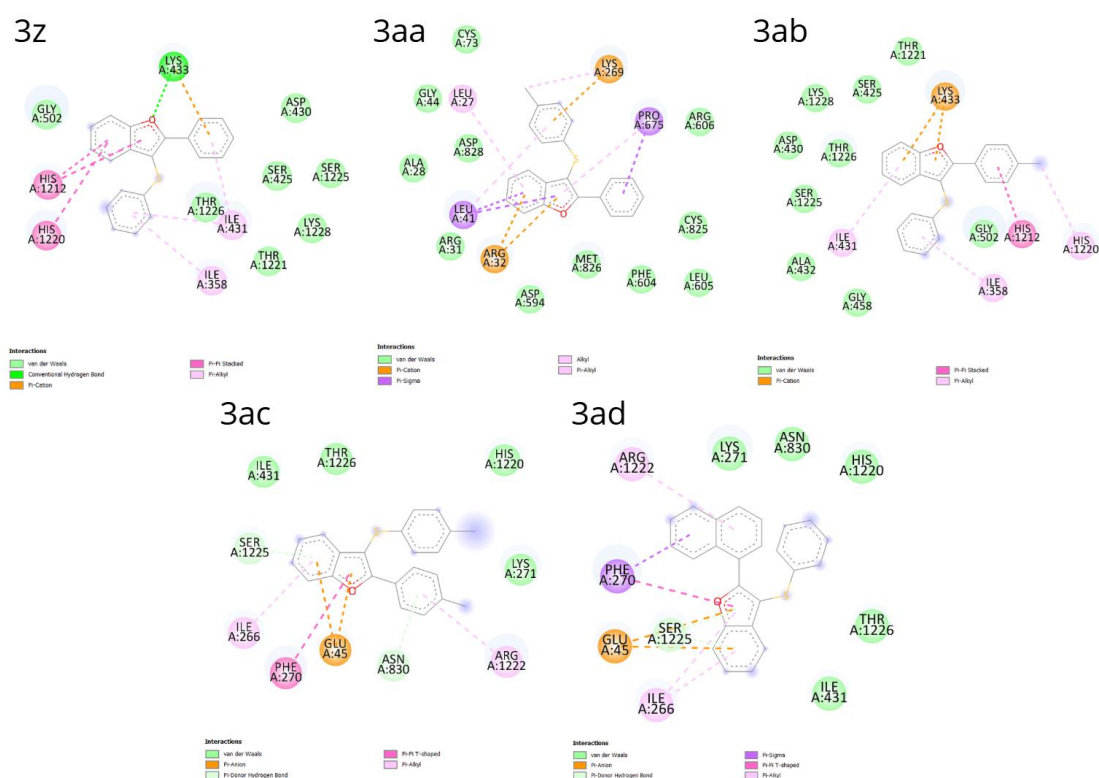

**Figure S66.** 2D interaction diagrams of compounds **3z**, **3aa**, **3ab**, **3ac** and **3ad** bound to xanthine oxidase active site.

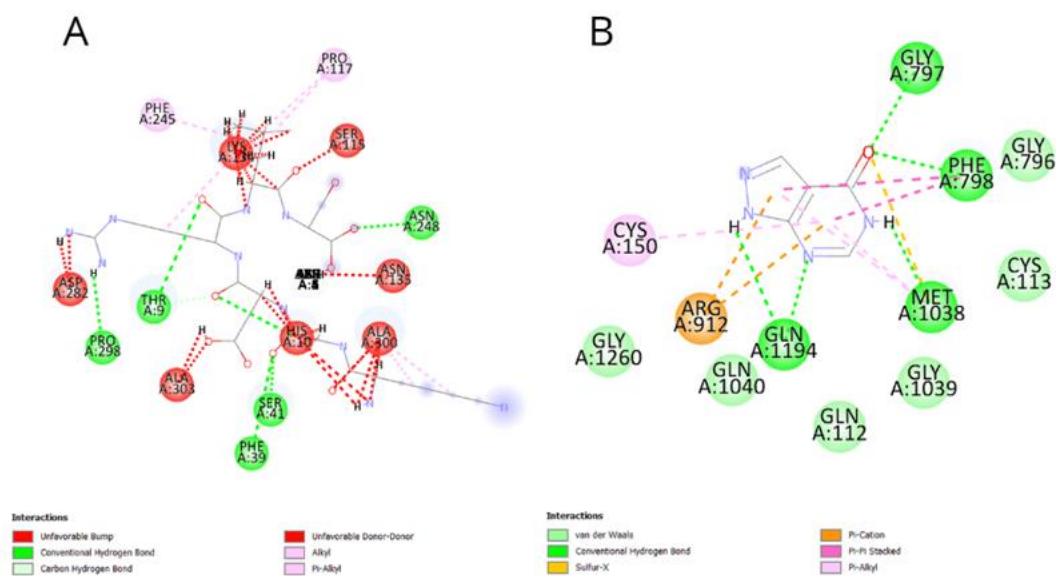

**Figure S67.** 2D interaction diagrams of the standard control TNF- $\alpha$  with active site of NADPH oxidase (A) and the standard control allopurinol with the active site of xanthine oxidase (B).

## 8.4 ADME/T results

**Table S1.** Prediction of the interaction of compounds **3a-3ae** with cytochrome P450 isoforms.

| #          | CYP2D6<br>substrate<br>(Yes/No) | CYP3A4<br>substrate<br>(Yes/No) | CYP2C9<br>inhibitor<br>(Yes/No) | CYP2D6<br>inhibitor<br>(Yes/No) | CYP3A4<br>inhibitor<br>(Yes/No) |
|------------|---------------------------------|---------------------------------|---------------------------------|---------------------------------|---------------------------------|
| <b>3a</b>  | No                              | Yes                             | No                              | No                              | No                              |
| <b>3b</b>  | No                              | Yes                             | Yes                             | No                              | No                              |
| <b>3c</b>  | No                              | Yes                             | Yes                             | No                              | No                              |
| <b>3d</b>  | No                              | Yes                             | Yes                             | No                              | No                              |
| <b>3e</b>  | No                              | Yes                             | Yes                             | No                              | Yes                             |
| <b>3f</b>  | No                              | Yes                             | Yes                             | No                              | No                              |
| <b>3g</b>  | No                              | Yes                             | Yes                             | No                              | Yes                             |
| <b>3h</b>  | No                              | Yes                             | Yes                             | Yes                             | No                              |
| <b>3i</b>  | No                              | Yes                             | Yes                             | Yes                             | No                              |
| <b>3j</b>  | No                              | Yes                             | Yes                             | No                              | No                              |
| <b>3k</b>  | No                              | Yes                             | Yes                             | No                              | No                              |
| <b>3l</b>  | No                              | Yes                             | No                              | No                              | No                              |
| <b>3m</b>  | No                              | Yes                             | No                              | No                              | No                              |
| <b>3n</b>  | No                              | Yes                             | Yes                             | No                              | No                              |
| <b>3o</b>  | No                              | Yes                             | Yes                             | No                              | Yes                             |
| <b>3p</b>  | No                              | Yes                             | Yes                             | No                              | No                              |
| <b>3q</b>  | No                              | Yes                             | Yes                             | No                              | No                              |
| <b>3r</b>  | No                              | Yes                             | Yes                             | No                              | No                              |
| <b>3s</b>  | No                              | Yes                             | Yes                             | Yes                             | Yes                             |
| <b>3t</b>  | No                              | Yes                             | Yes                             | No                              | No                              |
| <b>3u</b>  | No                              | Yes                             | Yes                             | No                              | No                              |
| <b>3v</b>  | No                              | Yes                             | Yes                             | Yes                             | No                              |
| <b>3w</b>  | No                              | Yes                             | No                              | No                              | No                              |
| <b>3x</b>  | No                              | Yes                             | No                              | No                              | No                              |
| <b>3y</b>  | No                              | Yes                             | No                              | Yes                             | No                              |
| <b>3z</b>  | No                              | Yes                             | No                              | No                              | No                              |
| <b>3aa</b> | No                              | Yes                             | Yes                             | No                              | No                              |
| <b>3ab</b> | No                              | Yes                             | Yes                             | No                              | No                              |
| <b>3ac</b> | No                              | Yes                             | Yes                             | No                              | No                              |
| <b>3ad</b> | No                              | Yes                             | Yes                             | Yes                             | No                              |

**Table S2.** Prediction of the pharmacokinetic parameter excretion and toxicological parameters of compounds **3a-3ad**.

| #          | Total clearance<br>(log ml/min/kg) | AMES toxicity<br>(Yes/No) | Hepatotoxicity<br>(Yes/No) |
|------------|------------------------------------|---------------------------|----------------------------|
| <b>3a</b>  | 1.984                              | No                        | No                         |
| <b>3b</b>  | 2.041                              | Yes                       | Yes                        |
| <b>3c</b>  | 2.043                              | Yes                       | Yes                        |
| <b>3d</b>  | 2.109                              | Yes                       | Yes                        |
| <b>3e</b>  | 2.113                              | Yes                       | Yes                        |
| <b>3f</b>  | 1.869                              | Yes                       | No                         |
| <b>3g</b>  | 1.941                              | No                        | No                         |
| <b>3h</b>  | 2.165                              | No                        | Yes                        |
| <b>3i</b>  | 2.150                              | No                        | Yes                        |
| <b>3j</b>  | 2.168                              | Yes                       | Yes                        |
| <b>3k</b>  | 0.068                              | Yes                       | No                         |
| <b>3l</b>  | 1.961                              | Yes                       | Yes                        |
| <b>3m</b>  | 0.072                              | No                        | No                         |
| <b>3n</b>  | 2.041                              | Yes                       | Yes                        |
| <b>3o</b>  | 0.067                              | No                        | Yes                        |
| <b>3p</b>  | 0.034                              | Yes                       | No                         |
| <b>3q</b>  | 2.041                              | Yes                       | Yes                        |
| <b>3r</b>  | 2.099                              | Yes                       | Yes                        |
| <b>3s</b>  | 0.067                              | No                        | Yes                        |
| <b>3t</b>  | 2.049                              | Yes                       | Yes                        |
| <b>3u</b>  | 1.875                              | Yes                       | No                         |
| <b>3v</b>  | 2.169                              | No                        | Yes                        |
| <b>3w</b>  | 2.231                              | No                        | Yes                        |
| <b>3x</b>  | 2.022                              | Yes                       | Yes                        |
| <b>3y</b>  | 1.657                              | Yes                       | Yes                        |
| <b>3z</b>  | 0.309                              | Yes                       | No                         |
| <b>3aa</b> | 0.250                              | Yes                       | No                         |
| <b>3ab</b> | 0.251                              | Yes                       | No                         |
| <b>3ac</b> | 0.196                              | Yes                       | No                         |
| <b>3ad</b> | 0.265                              | No                        | No                         |
